# Supplementary material for: Steric and electronic effects in latent S-chelated olefin metathesis catalysts
Source: Royal Society of Chemistry journal article supplement (doi:10.1039/d2cy00943a), 2022-06-14
Supplement: d2cy00943a1.pdf [file d2cy00943a1.pdf]

**Steric and electronic effects in latent S-chelated olefin metathesis catalysts**  
Nebal Alassad,<sup>a</sup> Noy B. Nechmad,<sup>a</sup> Ravindra S. Phatake,<sup>a,b</sup> Ofer Reany,<sup>b,\*</sup> N. Gabriel  
Lemcoff<sup>c,a\*</sup>

<sup>a</sup> Chemistry Department, Ben-Gurion University of the Negev, Beer-Sheva 8410501, Israel. E-mail: lemcoff@bgu.ac.il

<sup>b</sup> Department of Natural Sciences, The Open University of Israel, Ra'anana 4353701, Israel. E-mail: oferre@openu.ac.il

<sup>c</sup> Ilse Katz Institute for Nanoscale Science and Technology, Ben-Gurion University of the Negev, Beer-Sheva 8410501, Israel.

**Table of Contents**

| <b>Content</b>                                                                                                                                                                                                       | <b>Page</b> |
|----------------------------------------------------------------------------------------------------------------------------------------------------------------------------------------------------------------------|-------------|
| <b>Part I</b> General information                                                                                                                                                                                    | S4          |
| <b>Part II</b> Synthesis and characterization of the complexes                                                                                                                                                       | S4-S6       |
| <b>Part III</b> NMR data of new complexes                                                                                                                                                                            | S7-S13      |
| <b>Figure S1.</b> NMR spectra of <b>SIMes-SPh-Br<sub>2</sub></b> . <i>Top:</i> <sup>1</sup> H-NMR (400MHz, Acetone-d <sub>6</sub> ), <i>Bottom:</i> <sup>13</sup> C-NMR (400MHz, Acetone-d <sub>6</sub> ).           | S7          |
| <b>Figure S2.</b> NMR spectra of <b>SIMes-SCF<sub>3</sub>-Br<sub>2</sub></b> . <i>Top:</i> <sup>1</sup> H-NMR (400MHz, Acetone-d <sub>6</sub> ), <i>Bottom:</i> <sup>13</sup> C-NMR (400MHz, DCM-d <sub>2</sub> )    | S8          |
| <b>Figure S3.</b> NMR spectra of <b>SIPr-SPh-Cl<sub>2</sub></b> . <i>Top:</i> <sup>1</sup> H-NMR (400MHz, Acetone-d <sub>6</sub> ), <i>Bottom:</i> <sup>13</sup> C-NMR (400MHz, DCM-d <sub>2</sub> ).                | S9          |
| <b>Figure S4.</b> NMR spectra of <b>SIPr-SPh-Br<sub>2</sub></b> . <i>Top:</i> <sup>1</sup> H-NMR (400MHz, Acetone-d <sub>6</sub> ), <i>Bottom:</i> <sup>13</sup> C-NMR (400MHz, Acetone-d <sub>6</sub> ).            | S10         |
| <b>Figure S5.</b> NMR spectra of <b>SIPr-SPh-I<sub>2</sub></b> . <i>Top:</i> <sup>1</sup> H-NMR (400MHz, Acetone-d <sub>6</sub> ), <i>Bottom:</i> <sup>13</sup> C-NMR (400MHz, DCM-d <sub>2</sub> ).                 | S11         |
| <b>Figure S6.</b> NMR spectra of <b>SIPr-SCF<sub>3</sub>-Br<sub>2</sub></b> . <i>Top:</i> <sup>1</sup> H-NMR (400MHz, Acetone-d <sub>6</sub> ), <i>Bottom:</i> <sup>13</sup> C-NMR (400MHz, Acetone-d <sub>6</sub> ) | S12         |
| <b>Figure S7.</b> NMR spectra of <b>SIPr-SCF<sub>3</sub>-I<sub>2</sub></b> . <i>Top:</i> <sup>1</sup> H-NMR (400MHz, DCM-d <sub>2</sub> ), <i>Bottom:</i> <sup>13</sup> C-NMR (400MHz, DCM-d <sub>2</sub> )          | S13         |
| <b>Part IV</b> HRMS data of new complexes                                                                                                                                                                            | S14         |
| <b>Figure S8.</b> Experimental (A) and simulated (B) HRMS chromatogram of <b>SIMes-SPh-Br<sub>2</sub></b>                                                                                                            | S14         |
| <b>Figure S9.</b> Experimental (A) and simulated (B) HRMS chromatogram of <b>SIMes-SCF<sub>3</sub>-Br<sub>2</sub></b>                                                                                                | S15         |
| <b>Figure S10.</b> Experimental (A) and simulated (B) HRMS chromatogram of <b>SIPr-SPh-Cl<sub>2</sub></b>                                                                                                            | S16         |
| <b>Figure S11.</b> Experimental (A) and simulated (B) HRMS chromatogram of <b>SIPr-SPh-Br<sub>2</sub></b>                                                                                                            | S17         |
| <b>Figure S12.</b> Experimental (A) and simulated (B) HRMS chromatogram of <b>SIPr-SPh-I<sub>2</sub></b>                                                                                                             | S18         |
| <b>Figure S13.</b> Experimental (A) and simulated (B) HRMS chromatogram of <b>SIPr-SCF<sub>3</sub>-Br<sub>2</sub></b>                                                                                                | S19         |
| <b>Figure S14.</b> Experimental (A) and simulated (B) HRMS chromatogram of <b>SIPr-SCF<sub>3</sub>-I<sub>2</sub></b>                                                                                                 | S20         |
| <b>Part V</b> X-ray data                                                                                                                                                                                             | S21         |
| <b>Table S1.</b> Crystallographic data of <b>SIMes-SPh-Br<sub>2</sub></b> and <b>SIMes-SCF<sub>3</sub>-Br<sub>2</sub></b>                                                                                            | S21         |
| <b>Part VI</b> <i>Cis-trans</i> isomerization studies following heating to 80 °C                                                                                                                                     | S22-S27     |
| <b>Figures S15 – S26</b>                                                                                                                                                                                             |             |
| <b>Part VII</b> <i>Cis-trans</i> photoisomerization studies following irradiation at 350 nm.                                                                                                                         | S28-S33     |
| <b>Figures S27-S38</b>                                                                                                                                                                                               |             |
| <b>Part VIII</b> <i>Cis-trans</i> photoisomerization studies following irradiation at 510 nm.                                                                                                                        | S33-S38     |

**Figures S39-S50**

|                                                                                                                                                                                                                                                                                                                                  |         |
|----------------------------------------------------------------------------------------------------------------------------------------------------------------------------------------------------------------------------------------------------------------------------------------------------------------------------------|---------|
| <b>Part IX</b> Reactivity of equilibrated Ru complexes at <i>RT</i>                                                                                                                                                                                                                                                              | S40-S44 |
| <b>Figure S51.</b> RCM of <i>N,N</i> -diallyl-4-methylbenzenesulfonamide. Reaction conditions: toluene- <i>d</i> <sub>8</sub> , 0.1M of substrate, 1 mol-% <b>SIMes-SCF<sub>3</sub>-Cl<sub>2</sub></b>                                                                                                                           | S40     |
| <b>Figure S52.</b> RCM of <i>N,N</i> -diallyl-4-methylbenzenesulfonamide. Reaction conditions: toluene- <i>d</i> <sub>8</sub> , 0.1M of substrate, 1 mol-% <b>SIMes-SCF<sub>3</sub>-Br<sub>2</sub></b>                                                                                                                           | S40     |
| <b>Figure S53.</b> RCM of <i>N,N</i> -diallyl-4-methylbenzenesulfonamide. Reaction conditions: toluene- <i>d</i> <sub>8</sub> , 0.1M of substrate, 1 mol-% <b>SIMes-SCF<sub>3</sub>-I<sub>2</sub></b> .                                                                                                                          | S41     |
| <b>Figure S54.</b> RCM of <i>N,N</i> -diallyl-4-methylbenzenesulfonamide. Reaction conditions: toluene- <i>d</i> <sub>8</sub> , 0.1M of substrate, 1 mol-% <b>SIPr-SPh-Cl<sub>2</sub></b>                                                                                                                                        | S41     |
| <b>Figure S55.</b> RCM of <i>N,N</i> -diallyl-4-methylbenzenesulfonamide. Reaction conditions: toluene- <i>d</i> <sub>8</sub> , 0.1M of substrate, 1 mol-% <b>SIPr-SPh-Br<sub>2</sub></b> .                                                                                                                                      | S42     |
| <b>Figure S56.</b> RCM of <i>N,N</i> -diallyl-4-methylbenzenesulfonamide. Reaction conditions: toluene- <i>d</i> <sub>8</sub> , 0.1M of substrate, 1 mol-% <b>SIPr-SPh-I</b> .                                                                                                                                                   | S42     |
| <b>Figure S57.</b> RCM of <i>N,N</i> -diallyl-4-methylbenzenesulfonamide. Reaction conditions: toluene- <i>d</i> <sub>8</sub> , 0.1M of substrate, 1 mol-% <b>SIPr-SCF<sub>3</sub>-Cl<sub>2</sub></b> .                                                                                                                          | S43     |
| <b>Figure S58.</b> RCM of <i>N,N</i> -diallyl-4-methylbenzenesulfonamide. Reaction conditions: toluene- <i>d</i> <sub>8</sub> , 0.1M of substrate, 1 mol-% <b>SIPr-SCF<sub>3</sub>-Br<sub>2</sub></b> .                                                                                                                          | S43     |
| <b>Figure S59.</b> RCM of <i>N,N</i> -diallyl-4-methylbenzenesulfonamide. Reaction conditions: toluene- <i>d</i> <sub>8</sub> , 0.1M of substrate, 1 mol-% <b>SIPr-SCF<sub>3</sub>-I<sub>2</sub></b> .                                                                                                                           | S44     |
| <b>Part X</b> <i>Cis-trans</i> isomerization of <b>SIPr-SPh-I<sub>2</sub></b> at room temperature                                                                                                                                                                                                                                | S44     |
| <b>Figure S60.</b> SIPr-SPh-I <sub>2</sub> in toluene- <i>d</i> <sub>8</sub> at <i>RT</i> .                                                                                                                                                                                                                                      | S44     |
| <b>Part XI</b> Reactivity under irradiation for SIPr-SPh complexes after isomerization                                                                                                                                                                                                                                           | S45-S48 |
| <b>Table S2.</b> Reactivity of the SIPr-SPh complexes (1 mol-%) with 0.1M of <i>N,N</i> -diallyl-4-methylbenzenesulfonamide in toluene- <i>d</i> <sub>8</sub> , under different conditions.                                                                                                                                      | S45     |
| <b>Figure S61.</b> <sup>1</sup> H NMR spectra of RCM with <i>N,N</i> -diallyl-4-methylbenzenesulfonamide in toluene- <i>d</i> <sub>8</sub> , following irradiation of different precatalysts (1 mol-%) at 350 nm for 1 h and then addition of the RCM substrate at <i>RT</i> for 1h (Route a in Table S2).                       | S45     |
| <b>Figure S62.</b> <sup>1</sup> H NMR spectra of RCM with <i>N,N</i> -diallyl-4-methylbenzenesulfonamide in toluene- <i>d</i> <sub>8</sub> , following heating the different precatalysts (1 mol-%) to 100 °C for 30 min. and then addition of the RCM substrate followed by irradiation at 350 nm for 1h (Route b in Table S2). | S46     |
| <b>Figure S63.</b> <sup>1</sup> H NMR spectra of RCM with <i>N,N</i> -diallyl-4-methylbenzenesulfonamide in toluene- <i>d</i> <sub>8</sub> , following irradiation of different precatalysts (1 mol-%) and the RCM substrate at 350 nm for 1h (Route c in Table S2).                                                             | S46     |
| <b>Table S3.</b> Reactivity of the SIPr-SPh complexes (1 mol-%) with 0.1M of <i>N,N</i> -diallyl-4-methylbenzenesulfonamide in toluene- <i>d</i> <sub>8</sub> under irradiation at 510 nm in different conditions                                                                                                                | S47     |
| <b>Figure S64.</b> <sup>1</sup> H NMR spectra of RCM with <i>N,N</i> -diallyl-4-methylbenzenesulfonamide in toluene- <i>d</i> <sub>8</sub> , following heating the different precatalysts (1 mol-%) to 100 °C for 30 min. and then addition of the RCM substrate followed by irradiation at 510 nm for 1h (Route a in Table S3). | S47     |
| <b>Figure S65.</b> <sup>1</sup> H NMR spectra of RCM with <i>N,N</i> -diallyl-4-methylbenzenesulfonamide in toluene- <i>d</i> <sub>8</sub> , following irradiation of different precatalysts (1 mol-%) and the RCM substrate at 510 nm for 1h (Route c in Table S3).                                                             | S48     |
| <b>Figure S66.</b> RCM of <i>N,N</i> -diallyl-4-methylbenzenesulfonamide. Reaction conditions: toluene- <i>d</i> <sub>8</sub> , 0.1M of substrate, 1 mol-% <b>SIPr-SPh-Br<sub>2</sub></b> at <i>RT</i> .                                                                                                                         | S49     |
| <b>Figure S67.</b> RCM of <i>N,N</i> -diallyl-4-methylbenzenesulfonamide. Reaction conditions: toluene- <i>d</i> <sub>8</sub> , 0.1M of substrate, 1 mol-% <b>SIPr-SPh-Br<sub>2</sub></b> at 510 nm.                                                                                                                             | S49     |
| <b>Figure S68.</b> Isomerization 68% <b>trans-SIPr-SPh-Br<sub>2</sub></b> at <i>RT</i>                                                                                                                                                                                                                                           | S50     |

|                                                                                                                                                                                                         |     |
|---------------------------------------------------------------------------------------------------------------------------------------------------------------------------------------------------------|-----|
| <b>Figure S69.</b> Isomerization 68% <i>trans</i> -SIPr-SPh-Br <sub>2</sub> at 510nm                                                                                                                    | S50 |
| <b>Figure S70.</b> A) Isomerization of SIPr-SPh-Br <sub>2</sub> at 510nm for longer time. B) Zoom-in of the carbene region.                                                                             | S51 |
| <b>Part XII</b> Kinetic analysis of initiation of SIPr-SPh complexes                                                                                                                                    | S52 |
| <b>Figure S71.</b> Kinetic profile of initiation of SIPr-SPh-X <sub>2</sub> complexes. B) Kinetic profile of initiation of SIPr-SPh-I <sub>2</sub> and SIPr-SCF <sub>3</sub> -I <sub>2</sub> complexes. | S52 |
| <b>References</b>                                                                                                                                                                                       | S53 |

## Part I. General information

All commercially available solvents and reagents were of reagent grade and used without further purification unless otherwise stated. The ruthenium complexes, **Ru(SIMes)(=CHPhSPh)Cl<sub>2</sub>**, **Ru(SIMes)(=CHPhSPh)I<sub>2</sub>** and **Ru(SIMes)(=CHPhSCF<sub>3</sub>)I<sub>2</sub>** were prepared according to the previously reported procedures.<sup>1</sup> Purification by column chromatography was performed on Fluka silica gel 60 (40–60 μm). TLC analyses were performed using Merck pre-coated silica gel (0.2 mm) aluminum sheets.

All nuclear magnetic resonance (NMR) spectra were acquired on a Bruker AVANCE III 400 MHz spectrometer, chemical shifts, given in ppm are relative to Me<sub>4</sub>Si as the internal standard, or to the residual solvent peak. HRMS analyses were done on a Q Exactive™ Focus by Thermo Fisher with an ESI probe.

Irradiation experiments were carried out using a Luzchem LZC-ORG photoreactor with 510 nm lamps (green LED) and were carried out in 5mm NMR tubes at room temperature.

X-ray experimental data: Single crystals of **SIMes-SPh-Br<sub>2</sub>** and **SIMes-SCF<sub>3</sub>-Br<sub>2</sub>** were obtained by slow diffusion of pentane into dichloromethane and acetone solutions of the complexes, respectively, at 5 °C. A suitable crystal was selected and mounted on a Bruker APEXII DUO CCD diffractometer equipped with Cu-microsource, and data was collected using Mo-K<sub>α</sub> radiation (λ = 0.71073). The crystal was kept at 200.15 K during data collection. Using Olex2,<sup>2</sup> the structure was solved with the olex2.solve<sup>3</sup> structure solution program using Charge Flipping and refined with the SHELXL<sup>4</sup> refinement package using Least Squares minimization. Non-hydrogen atoms were refined anisotropically and hydrogen atoms isotropically.

## Part II. Synthesis and characterization of new complexes

**Ru(SIMes)(=CHPhSPh)Br<sub>2</sub>** A solution of lithium bromide (64 mg, 0.74 mmol, 5.0 equiv) in dry acetone (1 mL) was added to SIMes-SPh-Cl<sub>2</sub> (50 mg, 0.074 mmol, 1.0 equiv) in acetone (0.5 mL). The reaction mixture was stirred for 15 min, during which the color turned to bright green. The crude was filtered over celite with DCM as an eluent. Solvents were removed under vacuum. A minimal amount of acetone was added, followed by addition of hexane to obtain green crystals. Filtration over Büchner and washing with hexane produced dark green crystals (40 mg, 52.2 μmol, 70%). Crystals suitable for X-ray diffraction were obtained by slow diffusion of pentane to a DCM solution at –20 °C.

<sup>1</sup>H NMR (Acetone-d<sub>6</sub>, 400 MHz): δ (ppm) 17.05 (s, 1H), 7.55–7.51 (m, 1H), 7.36–7.31 (m, 2H), 7.29–7.22 (m, 3H), 7.11–7.08 (m, 2H), 7.01–6.99 (m, 2H), 6.92 (s, 2H), 6.05 (s, 1H), 4.24–4.06 (m, 4H), 2.72 (s, 3H), 2.63 (s, 3H), 2.53 (s, 3H), 2.24 (s, 3H), 2.18 (s, 3H), 1.86 (s, 3H). <sup>13</sup>C NMR (acetone-d<sub>6</sub>, 100 MHz): δ (ppm) 17.2, 18.7, 19.2, 20.1, 20.3, 20.4, 51.3, 51.7, 123.3, 128.0, 128.9, 129.1, 129.2, 129.3, 129.4, 129.5, 130.2, 132.4, 133.9, 135.5, 135.9, 136.5, 137.3, 138.0, 138.1, 138.9, 139.9, 155.1, 212.7, 280.6. HRMS m/z: calcd for [C<sub>34</sub>H<sub>36</sub>BrN<sub>2</sub>RuS]<sup>+</sup>, 685.08306; found, 685.08307.

**Ru(SIMes)(=CHPhSCF<sub>3</sub>)Cl<sub>2</sub>** The complex was synthesized according to the following modified procedure. A SMes 3<sup>rd</sup> generation Grubbs (250.0 mg, 0.31 mmol, 1.0 equiv) was dissolved in dry DCM (12 mL) followed by addition of the styrene ligand (75.6 mg, 0.37 mmol, 1.2 equiv) the reaction mixture was refluxed overnight. The solvent was removed under vacuum. The crude was purified by precipitations to give blue solid (190mg, 0.25 mmol, 82%). NMR spectra and HRMS matched the reported characterization.<sup>1b</sup>

**Ru(SIMes)(=CHPhSCF<sub>3</sub>)Br<sub>2</sub>** A solution of lithium bromide (64 mg, 0.75 mmol, 5.0 equiv) in dry acetone (1 mL) was added to SIMes-SCF<sub>3</sub>-Cl<sub>2</sub> (50 mg, 0.075 mmol, 1.0 equiv) in acetone (0.5 mL). The reaction mixture was stirred for 15 min, during which the color turned to bright green. The crude was filtered over celite with DCM as an eluent. Solvents were removed under vacuum. A minimal amount of

acetone was added, followed by addition of hexane to obtain green crystals. Filtration over Büchner and washing with hexane produced dark green crystals (40 mg, 52.8  $\mu\text{mol}$ , 70%). Crystals suitable for X-ray diffraction were obtained by slow diffusion of pentane to a DCM solution at  $-20\text{ }^{\circ}\text{C}$ .

$^1\text{H}$  NMR (Acetone- $d_6$ , 400 MHz):  $\delta$  (ppm) 16.82 (s, 1H), 7.89–7.87 (d, 1H), 7.78–7.35 (m, 1H), 7.49–7.45 (m, 1H), 7.09–7.00 (m, 4H), 6.88 (s, 1H), 4.29–4.06 (m, 4H), 2.65 (s, 3H), 2.63 (s, 3H), 2.45 (s, 3H), 2.30 (s, 3H), 2.15 (s, 3H), 1.78 (s, 3H).  $^{13}\text{C}$  NMR (DCM- $d_2$ , 100 MHz):  $\delta$  (ppm) 17.9, 19.5, 19.6, 21.2, 21.4, 21.5, 52.1, 52.3, 124.8, 129.5, 129.9, 130.1, 130.2, 131.0, 131.7, 135.4, 136.7, 137.9, 139.2, 141.1, 155.5, 209.6, 284.1 HRMS  $m/z$ : calcd for  $[\text{C}_{29}\text{H}_{31}\text{BrF}_3\text{N}_2\text{RuS}]^+$ , 677.03814; found, 677.03784.

**Ru(SIPr)(=CHPhSPh)Cl<sub>2</sub>** A SIPr Grubbs (250.0 mg, 0.27 mmol, 1.0 equiv) was dissolved in dry DCM (15 mL) followed by addition of the styrene ligand (68.3 mg, 0.32 mmol, 1.2 equiv) the reaction mixture was refluxed for 4 days. The solvent was removed under vacuum. The crude was purified by flash chromatography using 3:7 to 5:5 acetone/hexane as eluent to give a green solid after solvent evaporation (113.6 mg, 0.15 mmol, 55%).

$^1\text{H}$  NMR (Acetone- $d_6$ , 400 MHz):  $\delta$  (ppm) 17.01 (s, 1H), 7.59–7.50 (m, 3H), 7.43–7.41 (m, 1H), 7.35–7.22 (m, 5H), 7.13 (t, 2H), 6.89–7.87 (m, 1H), 6.84–6.82 (m, 2H), 6.64–6.62 (m, 1H), 4.37–4.10 (m, 4H), 3.48 (m, 1H), 2.55 (m, 1H), 1.73–1.72 (d, 3H), 1.66–1.64 (d, 3H), 1.54–1.52 (d, 3H), 1.32–1.30 (d, 3H), 1.19 (t, 6H), 1.04–1.03 (d, 3H), 0.42–0.40 (d, 3H).  $^{13}\text{C}$  NMR (DCM- $d_2$ , 100 MHz):  $\delta$  (ppm) 21.5, 22.8, 23.2, 24.9, 26.5, 27.1, 28.2, 28.3, 28.9, 29.1, 29.4, 29.6, 31.2, 124.0, 125.0, 125.6, 126.3, 128.5, 129.4, 129.8, 129.9, 130.7, 131.2, 131.4, 132.4, 133.9, 136.8, 139.0, 146.1, 147.9, 149.8, 151.4, 155.9, 217.3, 285.5. HRMS  $m/z$ : calcd for  $[\text{C}_{40}\text{H}_{48}\text{BrN}_2\text{RuS}]^+$ , 725.22647; found, 725.22681.

**Ru(SIPr)(=CHPhSPh)Br<sub>2</sub>** A solution of lithium bromide (45.7 mg, 0.53 mmol, 5.0 equiv) in dry acetone (1 mL) was added to SIPr-SPh-Cl<sub>2</sub> (40.0 mg, 0.0053 mmol, 1.0 equiv) in acetone (0.5 mL). The reaction mixture was stirred for 15 min, during which the color turned to bright green. The crude was filtered over celite with DCM as an eluent. Solvents were removed under vacuum. A minimal amount of acetone was added, followed by addition of hexane to obtain green crystals. Filtration over Büchner and washing with hexane produced dark green crystals (31.0 mg, 36.5  $\mu\text{mol}$ , 69%).

$^1\text{H}$  NMR (Acetone- $d_6$ , 400 MHz):  $\delta$  (ppm) 16.96 (s, 1H), 7.60–7.51 (m, 3H), 7.40–7.38 (m, 1H), 7.35–7.24 (m, 5H), 7.18–7.14 (m, 2H), 6.92–6.86 (m, 3H), 6.61–6.59 (m, 1H), 4.38–4.32 (m, 4H), 3.49 (m, 1H), 2.62 (m, 1H), 1.71–1.69 (d, 3H), 1.64–1.63 (d, 3H), 1.54–1.52 (d, 3H), 1.30–1.29 (d, 3H), 1.18 (t, 6H), 1.04–1.02 (d, 3H), 0.49–0.47 (d, 3H).  $^{13}\text{C}$  NMR (Acetone- $d_6$ , 100 MHz):  $\delta$  (ppm) 20.9, 21.9, 22.7, 24.4, 25.9, 26.2, 27.2, 27.5, 53.7, 54.2, 123.4, 124.2, 124.6, 124.9, 125.6, 127.8, 128.7, 129.2, 129.3, 130.2, 130.4, 130.7, 132.3, 133.6, 136.8, 137.6, 145.7, 147.3, 148.9, 150.4, 155.4, 216.3, 282.7. HRMS  $m/z$ : calcd for  $[\text{C}_{40}\text{H}_{48}\text{BrN}_2\text{RuS}]^+$ , 769.17596; found, 771.175542.

### **Ru(SIPr)(=CHPhSPh)I<sub>2</sub>**

A solution of sodium iodide (78.9 mg, 0.53 mmol, 5.0 equiv) in dry acetone (1 mL) was added to SIPr-SPh-Cl<sub>2</sub> (40.0 mg, 0.0053 mmol, 1.0 equiv) in acetone (0.5 mL). The reaction mixture was stirred for 15 min, during which the color turned to bright brown. The crude was filtered over celite with DCM as an eluent. Solvents were removed under vacuum. A minimal amount of acetone was added, followed by addition of hexane to obtain brown crystals. Filtration over Büchner and washing with hexane produced dark brown crystals (29.8 mg, 31.58  $\mu\text{mol}$ , 60%).

$^1\text{H}$  NMR (Acetone- $d_6$ , 400 MHz):  $\delta$  (ppm) 16.74 (s, 1H), 7.62–7.58 (dt, 3H), 7.50 (s, 1H), 7.49–7.48 (d, 1H), 7.35–7.23 (m, 5H), 7.17 (t, H), 7.05–7.02 (m, 3H), 6.97–6.95 (dd, 1H), 6.57–6.54 (dd, 1H), 4.38–4.18 (m, 4H), 3.53 (m, 1H), 2.87 (m, 1H), 1.60–1.59 (d, 3H), 1.57–1.54 (m, 6H), 1.27–1.25 (d, 3H),

1.17 (t, 6H), 1.04–1.03 (d, 3H), 0.69–0.67(d, 3H). <sup>13</sup>C NMR (DCM-d<sub>2</sub>, 100 MHz): δ (ppm) 21.9, 22.7, 23.8, 24.4, 25.1, 25.4, 25.7, 27.0, 27.3, 28.1, 29.2, 29.3, 29.5, 30.0, 123.9, 125.0, 125.3, 125.5, 125.6, 125.8, 126.4, 128.4, 129.9, 130.5, 130.7, 131.0, 133.0, 137.1, 146.1, 146.7, 147.7, 149.5, 150.9, 156.4, 158.4, 216.8, 283.7. HRMS m/z: calcd for [C<sub>40</sub>H<sub>48</sub>N<sub>2</sub>RuS]<sup>+</sup>, 817.16209; found, 817.16400.

**Ru(SIPr)(=CHPhSCF<sub>3</sub>)Cl<sub>2</sub>** The complex was synthesized according to the following modified procedure. A SIPr 3<sup>rd</sup> generation Grubbs (140.0 mg, 0.17 mmol, 1.0 equiv) was dissolved in dry DCM (2 mL) followed by addition of the styrene ligand (42.3 mg, 0.21 mmol, 1.2 equiv) the reaction mixture was stirred at R.T. overnight. The solvent was removed under vacuum. The crude was purified by precipitations to give green solid (94.3 mg, 0.12 mmol, 72%). NMR spectra and HRMS matched the reported characterization.<sup>5</sup>

**Ru(SIPr)(=CHPhSCF<sub>3</sub>)Br<sub>2</sub>** A solution of lithium bromide (46.2 mg, 0.53 mmol, 5.0 equiv) in dry acetone (1 mL) was added to SIPr-SCF<sub>3</sub>-Cl<sub>2</sub> (40.0 mg, 0.053 mmol, 1.0 equiv) in acetone (0.5 mL). The reaction mixture was stirred for 15 min, during which the color turned to bright green. The crude was filtered over celite with DCM as an eluent. Solvents were removed under vacuum. A minimal amount of acetone was added, followed by addition of hexane to obtain green crystals. Filtration over Büchner and washing with hexane produced dark green crystals (31.0 mg, 36.8 μmol, 69%).

<sup>1</sup>H NMR (DCM-d<sub>2</sub>, 400 MHz): δ (ppm) 16.70 (s, 1H), 7.69–7.67 (d, 1H), 7.62–7.58 (m, 1H), 7.54 (t, 1H), 7.45–7.42 (m, 1H), 7.36–7.34 (m, 1H), 7.32–7.29 (m, 1H), 7.28–7.26 (m, 1H), 7.18 (t, 1H), 6.89–6.87 (m, 1H), 6.47–6.45 (m, 1H), 4.31–4.08 (m, 4H), 3.38 (m, 1H), 2.38 (m, 1H), 1.64–1.63 (d, 3H), 1.60–1.58 (m, 6H), 1.24–1.21 (m, 6H), 1.19–1.17 (d, 3H), 0.98–0.96 (d, 3H), 0.51–0.49 (d, 3H). <sup>13</sup>C NMR (Acetone-d<sub>6</sub>, 100 MHz): δ (ppm) 21.9, 22.4, 23.6, 25.5, 26.9, 28.0, 28.5, 54.7, 55.3, 124.1, 125.2, 125.7, 125.9, 126.5, 130.5, 130.8, 131.6, 131.9, 132.9, 146.5, 148.1, 150.0, 151.3, 155.4, 213.4, 283.9. HRMS m/z: calcd for [C<sub>35</sub>H<sub>43</sub>BrF<sub>3</sub>N<sub>2</sub>RuS]<sup>+</sup>, 761.13204; found, 763.13171.

**Ru(SIPr)(=CHPhSCF<sub>3</sub>)I<sub>2</sub>** A solution of sodium iodide (49.85 mg, 0.33 mmol, 5.0 equiv) in dry acetone (1 mL) was added to SIPr-SCF<sub>3</sub>-Cl<sub>2</sub> (25.0 mg, 0.033 mmol, 1.0 equiv) in acetone (0.5 mL). The reaction mixture was stirred for 15 min, during which the color turned to bright brown. The crude was filtered over celite with DCM as an eluent. Solvents were removed under vacuum. A minimal amount of acetone was added, followed by addition of hexane to obtain brown crystals. Filtration over Büchner and washing with hexane produced dark green crystals (18.4 mg, 59.13 μmol, 59%).

<sup>1</sup>H NMR (DCM-d<sub>2</sub>, 400 MHz): δ (ppm) 16.45 (s, 1H), 7.71–7.67 (d, 1H), 7.63–7.60 (td, 1H), 7.51 (t, 1H), 7.39–7.32 (m, 4H), 7.27–7.23 (m, 2H), 7.11 (t, 1H), 6.91–6.88 (dd, 1H), 6.44–6.42 (dd, 1H), 4.32–4.06 (m, 4H), 3.48 (m, 1H), 2.57 (m, 1H), 1.61–1.60 (d, 3H), 1.59–1.58 (d, 3H), 1.45–1.43 (d, 3H), 1.22–1.18 (m, 6H), 1.16–1.15 (d, 3H), 0.98–1.96 (d, 3H), 0.67–0.65 (d, 3H). <sup>13</sup>C NMR (DCM-d<sub>2</sub>, 100 MHz): δ (ppm) 21.9, 22.1, 23.7, 24.4, 25.1, 25.7, 26.8, 27.2, 28.2, 28.8, 29.2, 29.8, 30.3, 31.2, 123.7, 124.9, 125.6, 125.8, 126.3, 128.4, 129.7, 130.2, 131.1, 131.7, 132.0, 132.4, 136.5, 146.0, 146.7, 147.6, 149.8, 150.8, 207.0, 256.1. HRMS m/z: calcd for [C<sub>35</sub>H<sub>41</sub>F<sub>3</sub>BrN<sub>2</sub>RuS]<sup>+</sup>, 809.11817; found, 809.12634.

### Part III. NMR data of new complexes

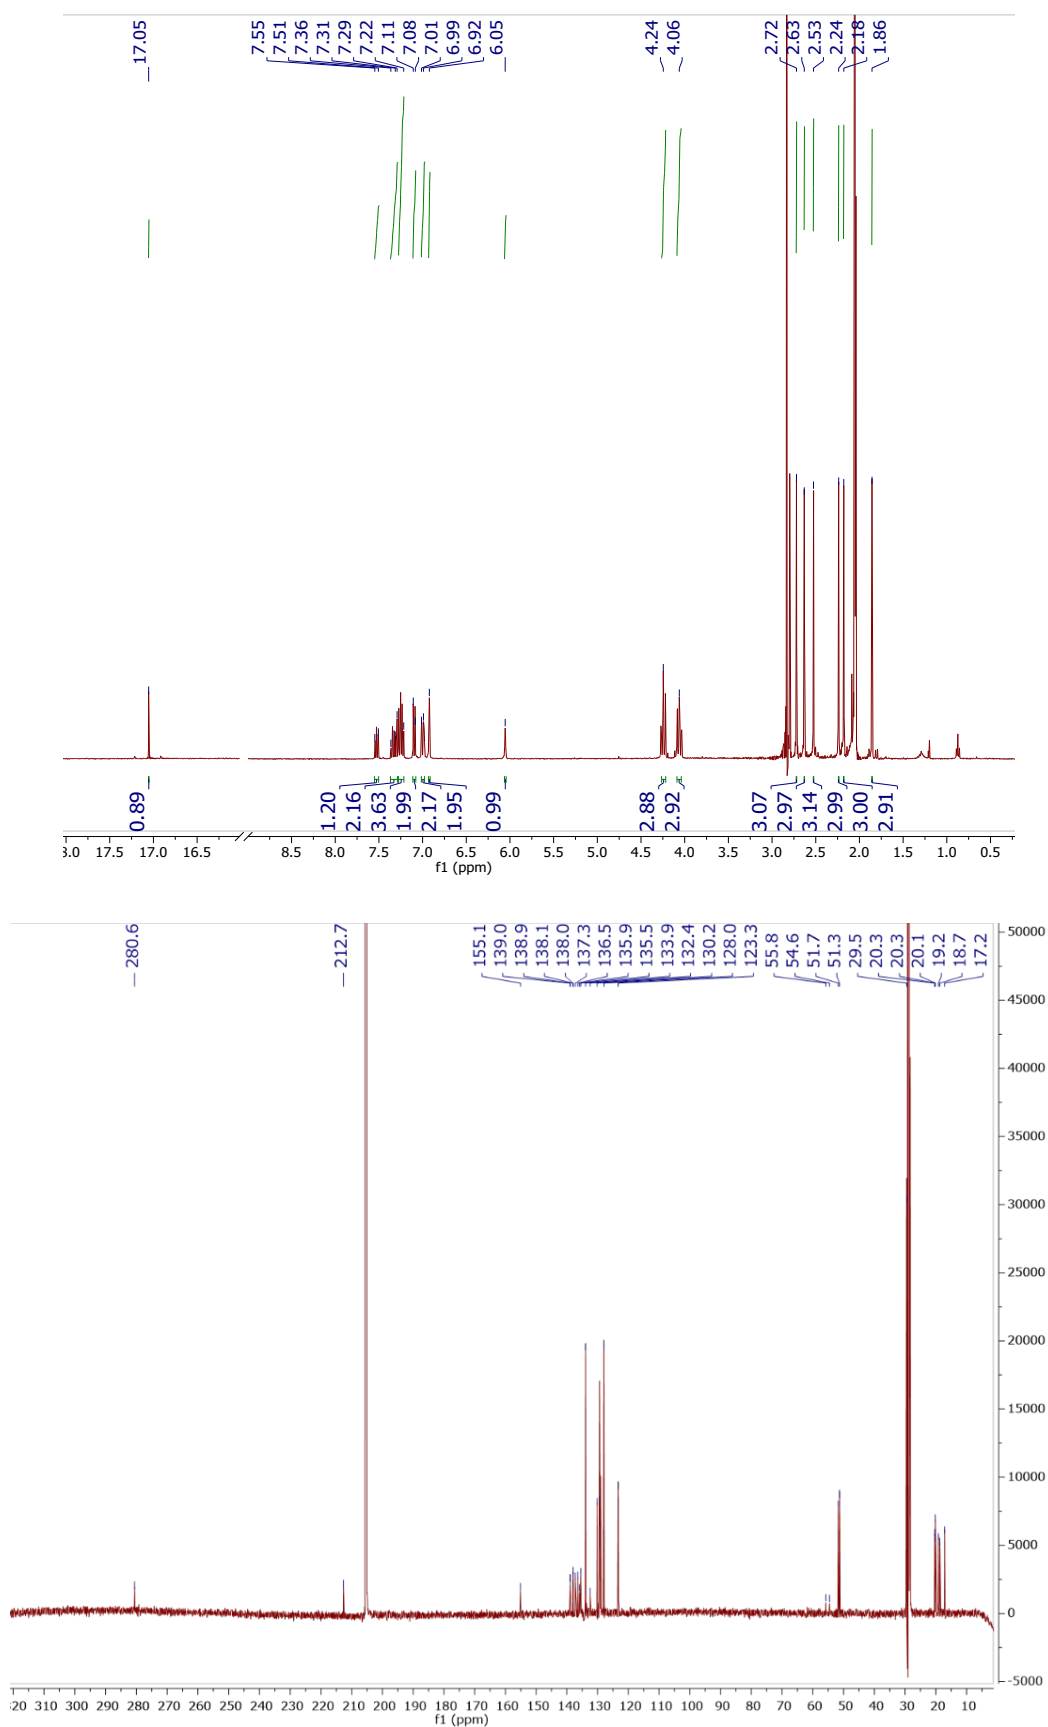

**Figure S1.** NMR spectra of SIMes-SPh-Br<sub>2</sub>. Top: <sup>1</sup>H-NMR (400MHz, Acetone-d<sub>6</sub>), Bottom: <sup>13</sup>C-NMR (400MHz, Acetone-d<sub>6</sub>).

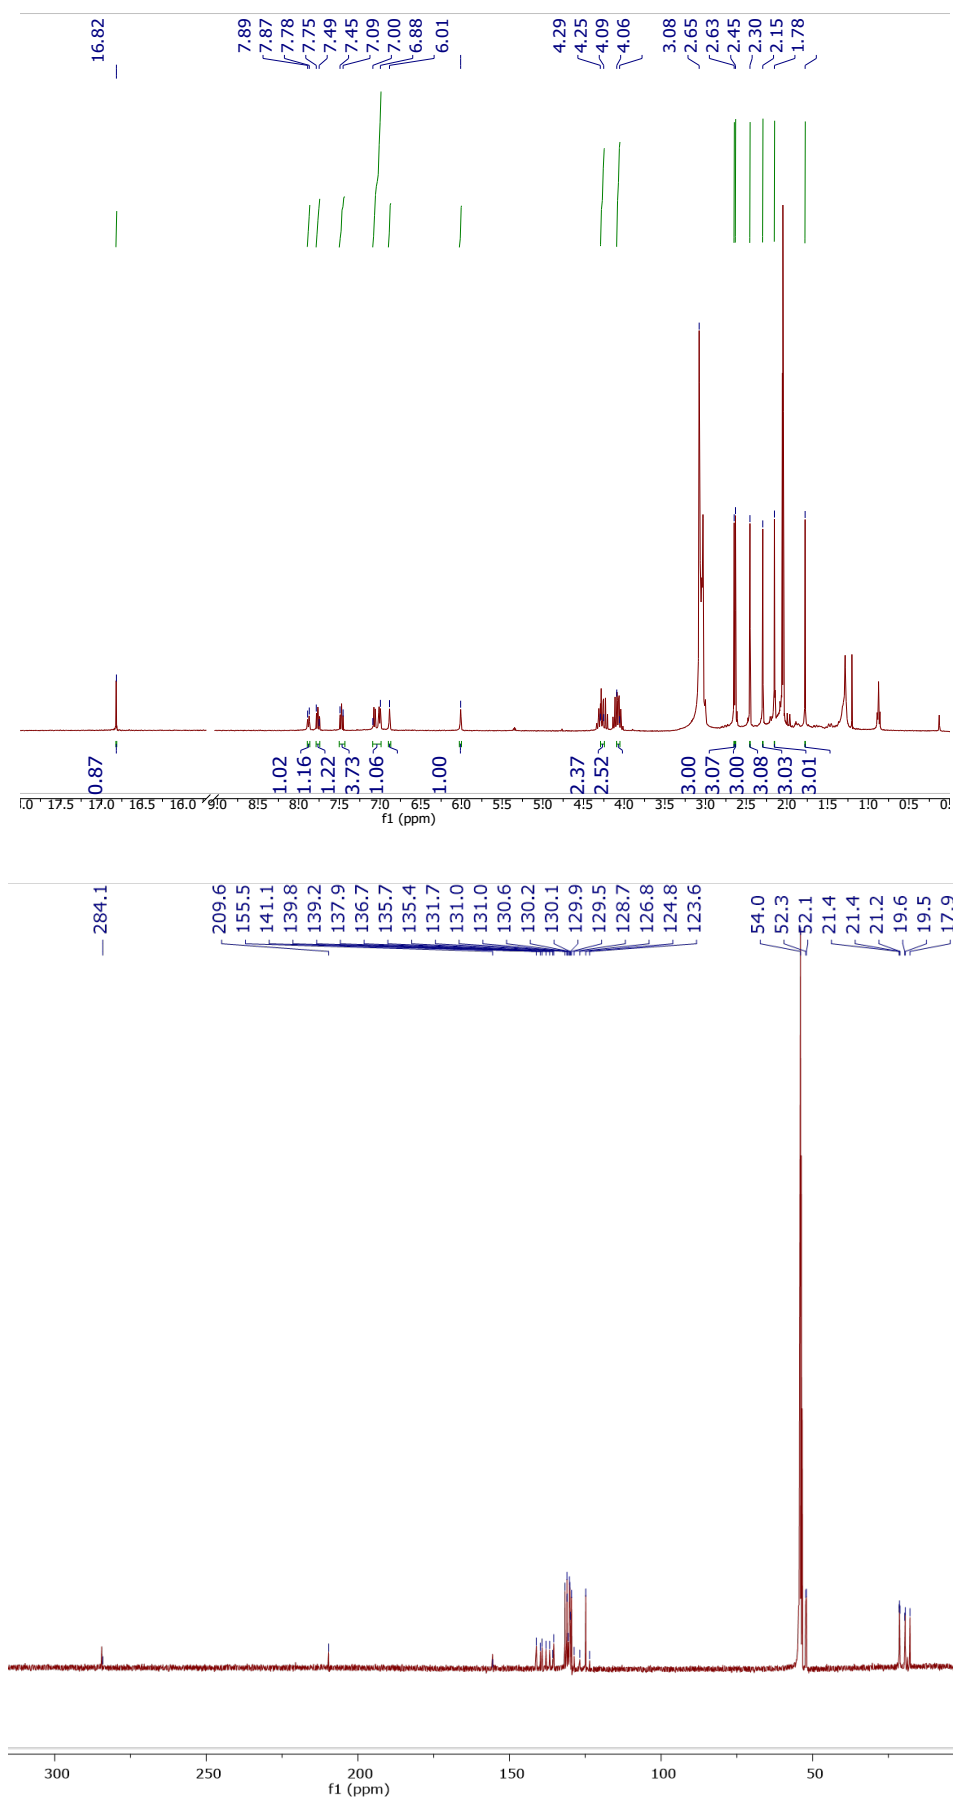

**Figure S2.** NMR spectra of SIMes-SCF<sub>3</sub>-Br<sub>2</sub>. Top: <sup>1</sup>H-NMR (400MHz, Acetone-d<sub>6</sub>), Bottom: <sup>13</sup>C-NMR (400MHz, DCM-d<sub>2</sub>).



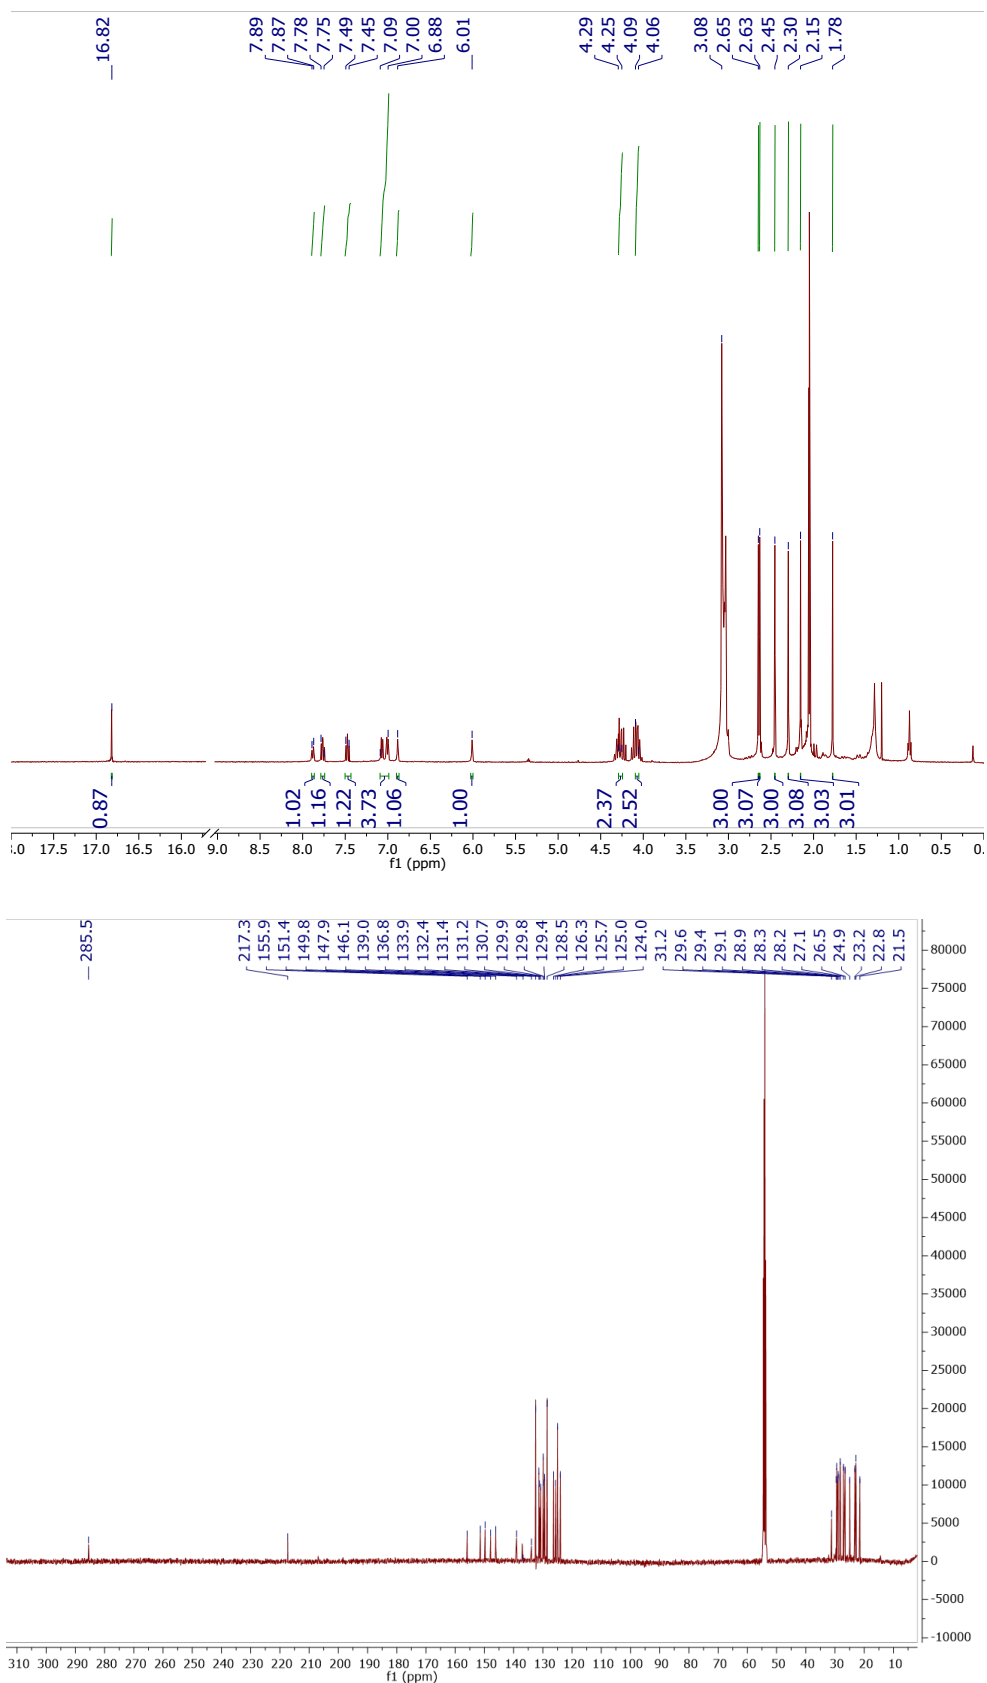

**Figure S3.** NMR spectra of SIPr-SPh-Cl<sub>2</sub>. Top: <sup>1</sup>H-NMR (400MHz, Acetone-d<sub>6</sub>), Bottom: <sup>13</sup>C-NMR (400MHz, DCM-d<sub>2</sub>).

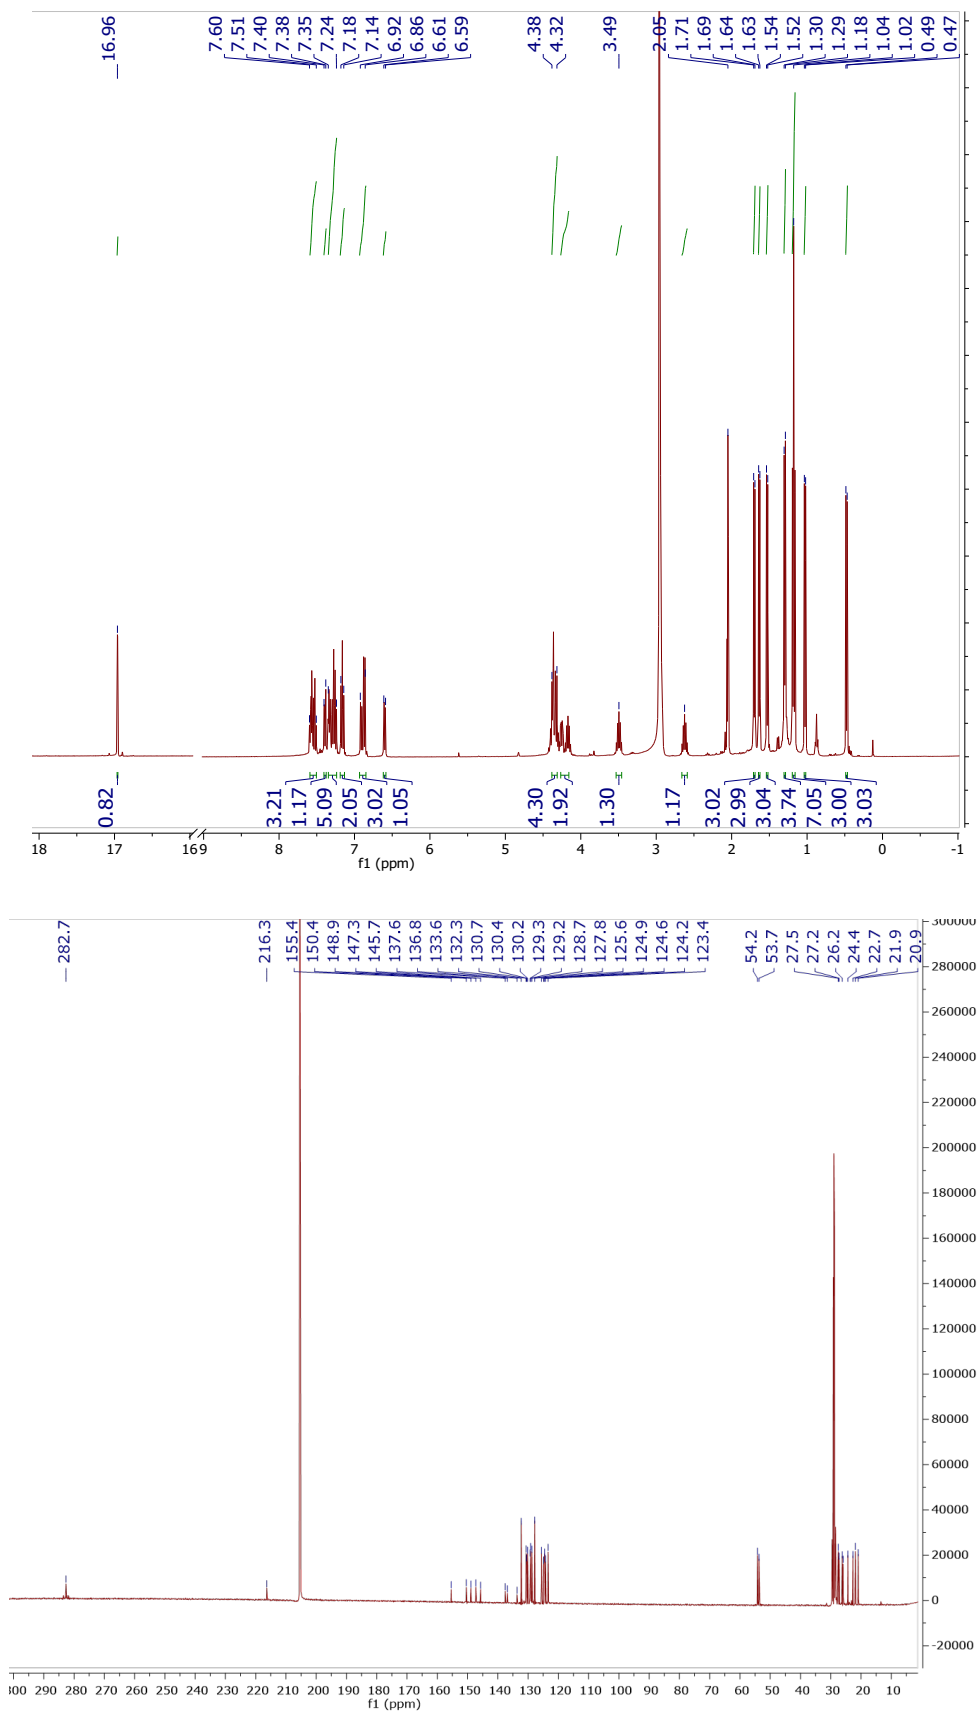

**Figure S4.** NMR spectra of SIPr-SPh-Br<sub>2</sub>. Top: <sup>1</sup>H-NMR (400MHz, Acetone-d<sub>6</sub>), Bottom: <sup>13</sup>C-NMR (400MHz, Acetone-d<sub>6</sub>).

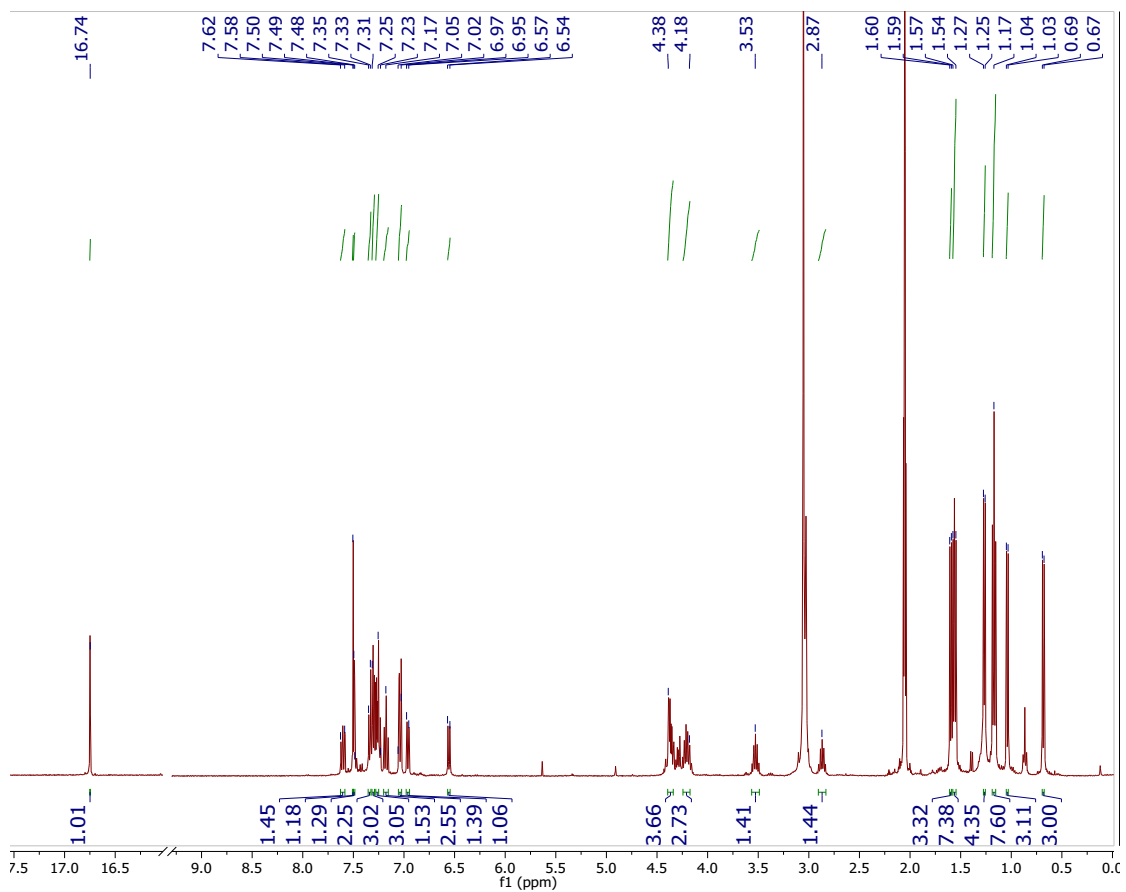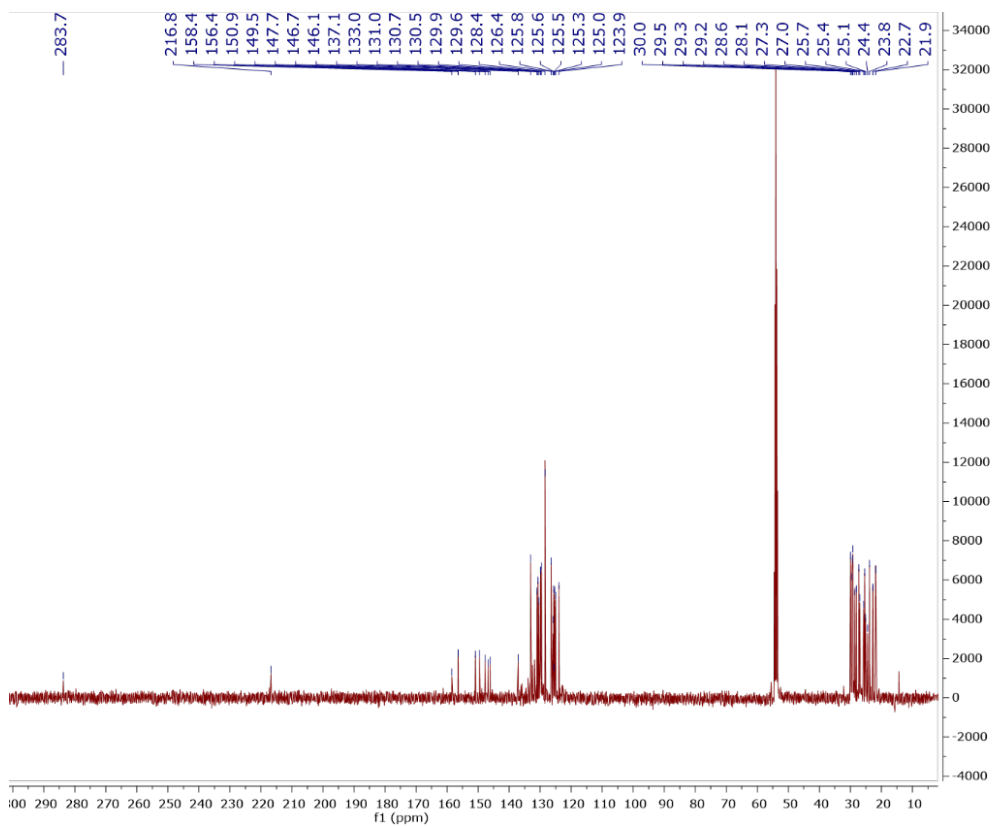

**Figure S5.** NMR spectra of SIPr-SPh-I<sub>2</sub>. Top: <sup>1</sup>H-NMR (400MHz, Acetone-d<sub>6</sub>), Bottom: <sup>13</sup>C-NMR (400MHz, DCM-d<sub>2</sub>).

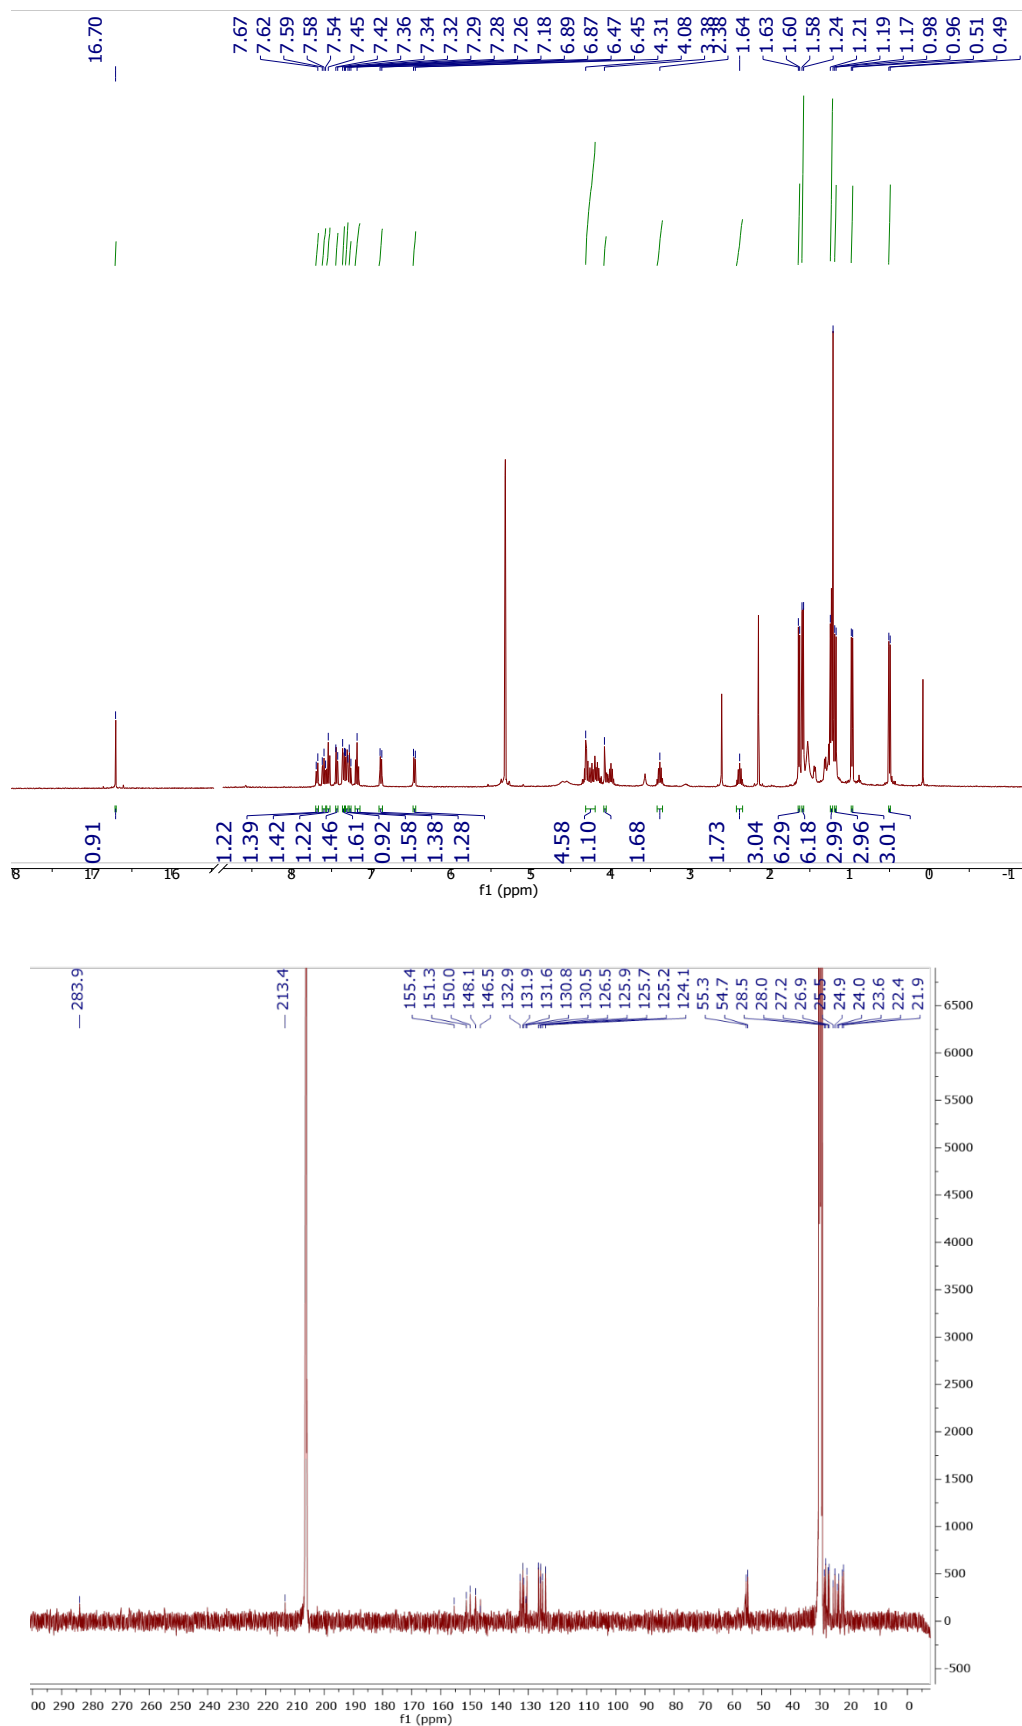

**Figure S6.** NMR spectra of SIPr-SCF<sub>3</sub>-Br<sub>2</sub>. Top: <sup>1</sup>H-NMR (400MHz, Acetone-d<sub>6</sub>), Bottom: <sup>13</sup>C-NMR (400MHz, Acetone-d<sub>6</sub>)

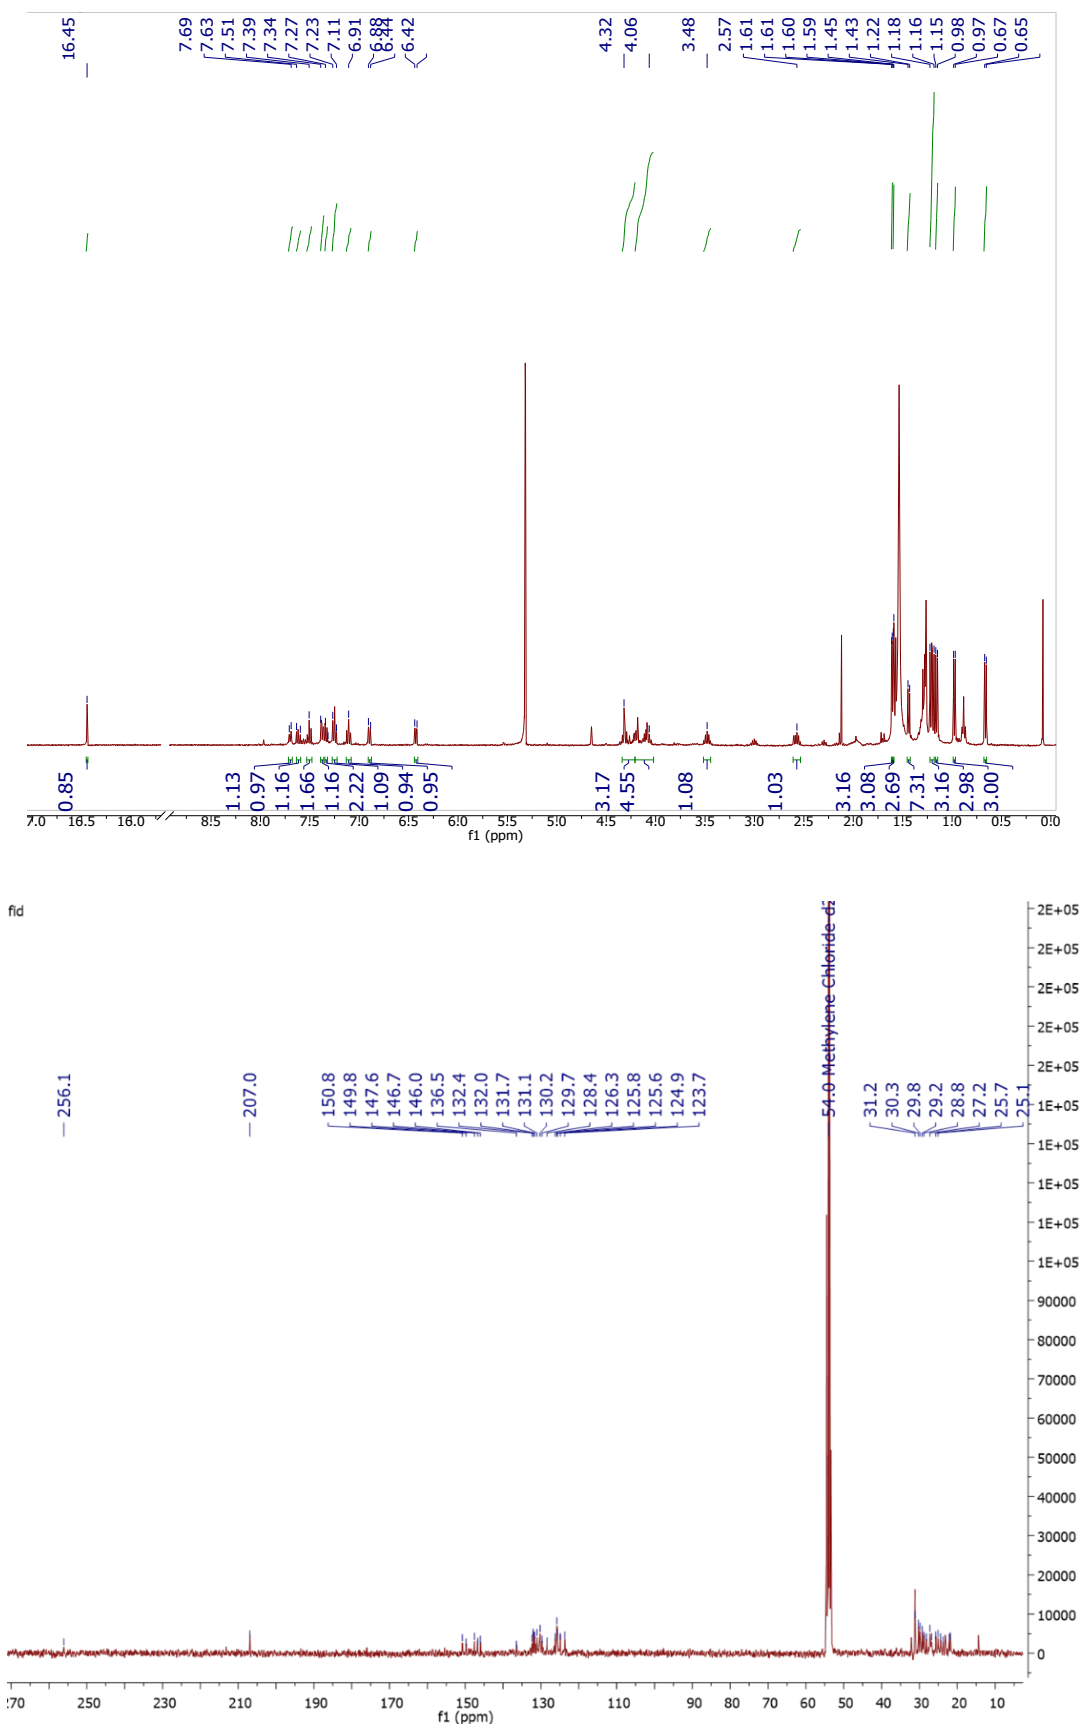

**Figure S7.** NMR spectra of SIPr-SCF<sub>3</sub>-I<sub>2</sub>. Top: <sup>1</sup>H-NMR (400MHz, DCM-d<sub>2</sub>), Bottom: <sup>13</sup>C-NMR (400MHz, DCM-d<sub>2</sub>)

## Part IV. HRMS data of new complexes

A)

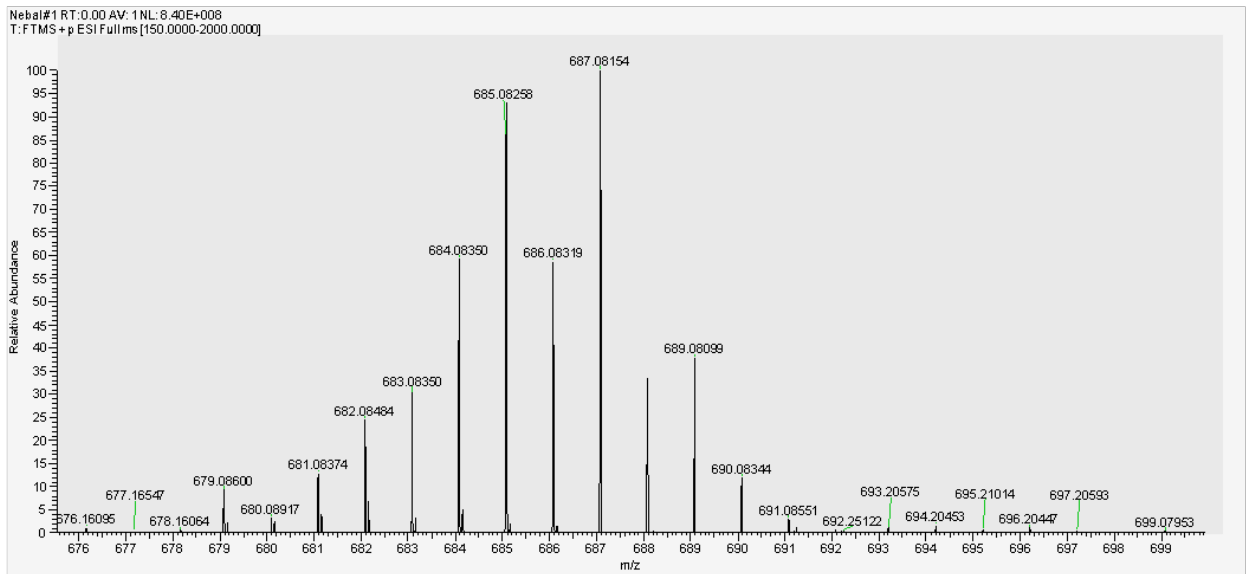

B)

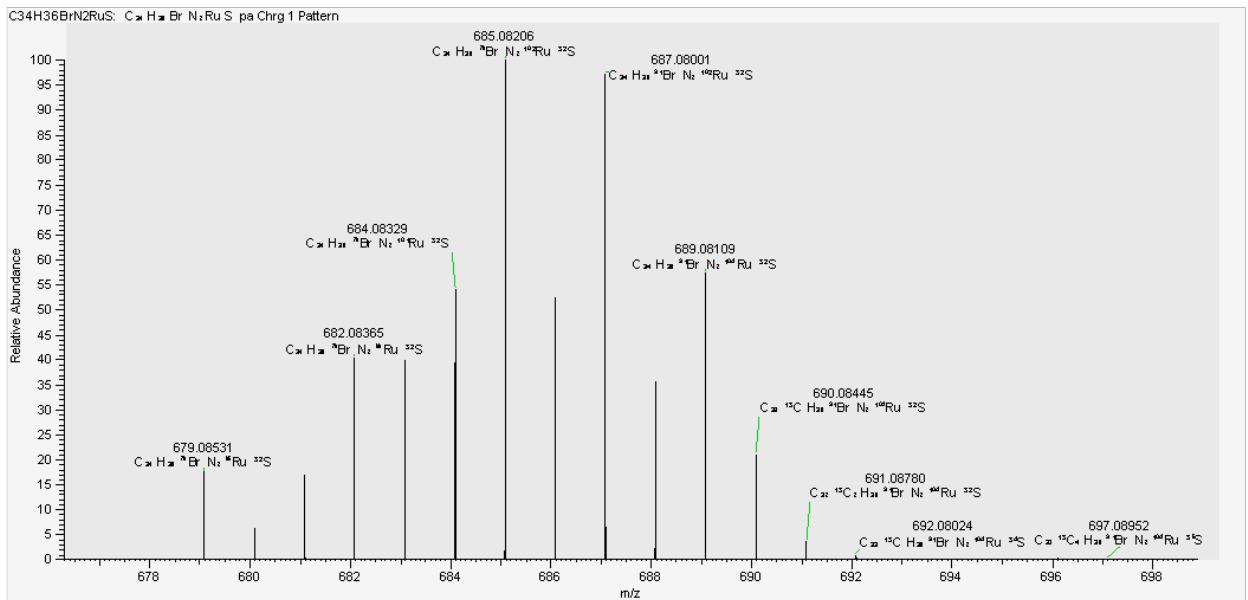

Figure S8. Experimental (A) and simulated (B) HRMS chromatogram of SIMes-SPh-Br<sub>2</sub>

A)

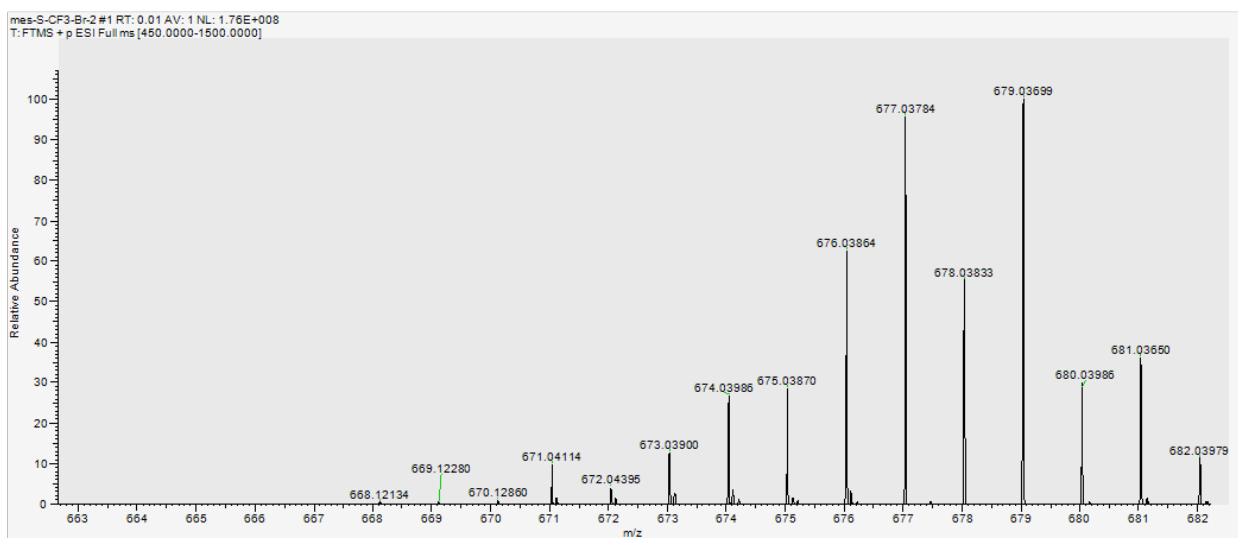

B)

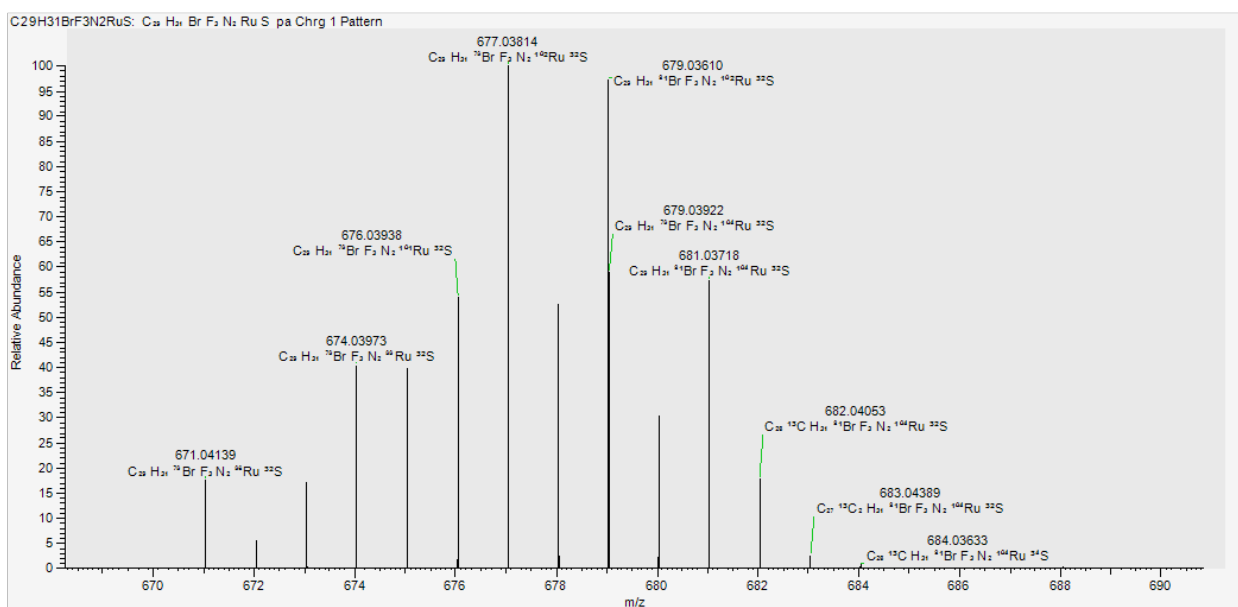

Figure S9. Experimental (A) and simulated (B) HRMS chromatogram of SIMes-SCF<sub>3</sub>-Br<sub>2</sub>

A)

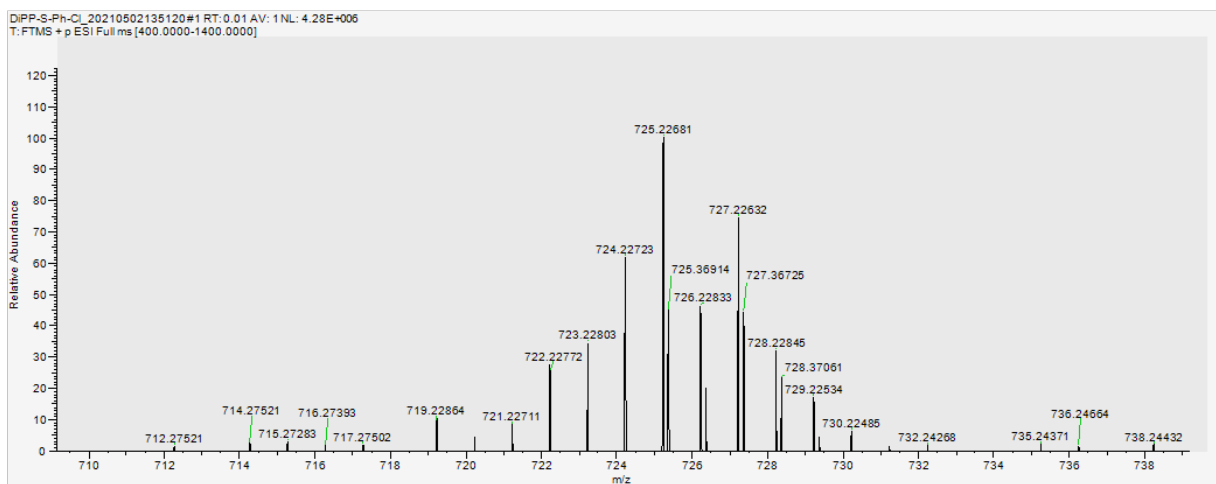

B)

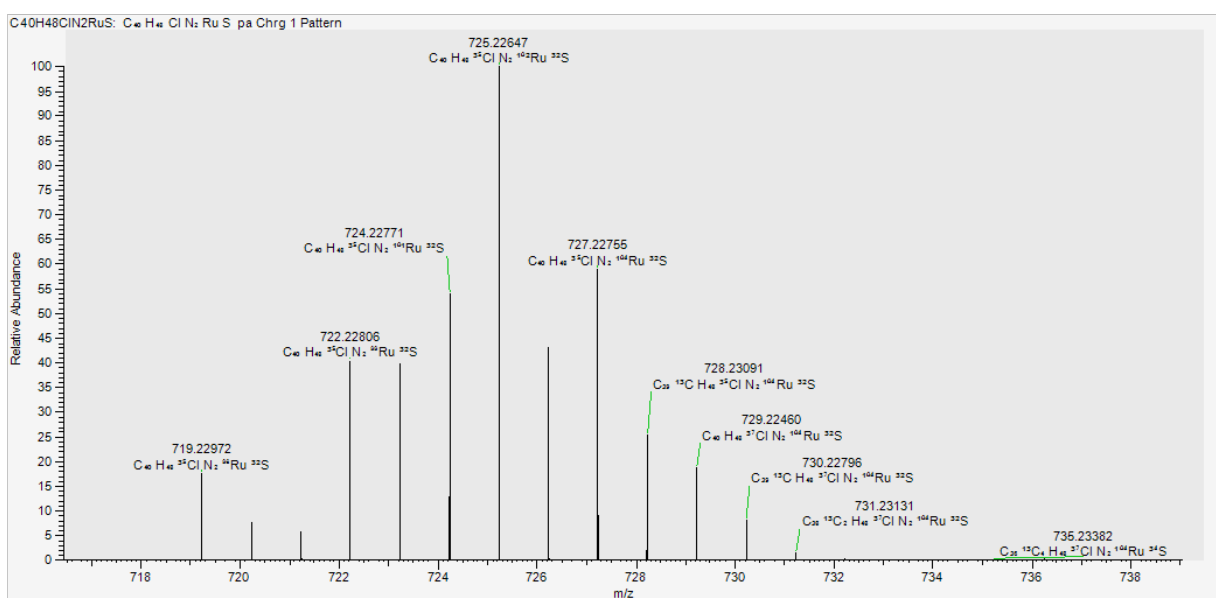

Figure S10. Experimental (A) and simulated (B) HRMS chromatogram of SIPr-SPh-Cl<sub>2</sub>



A)

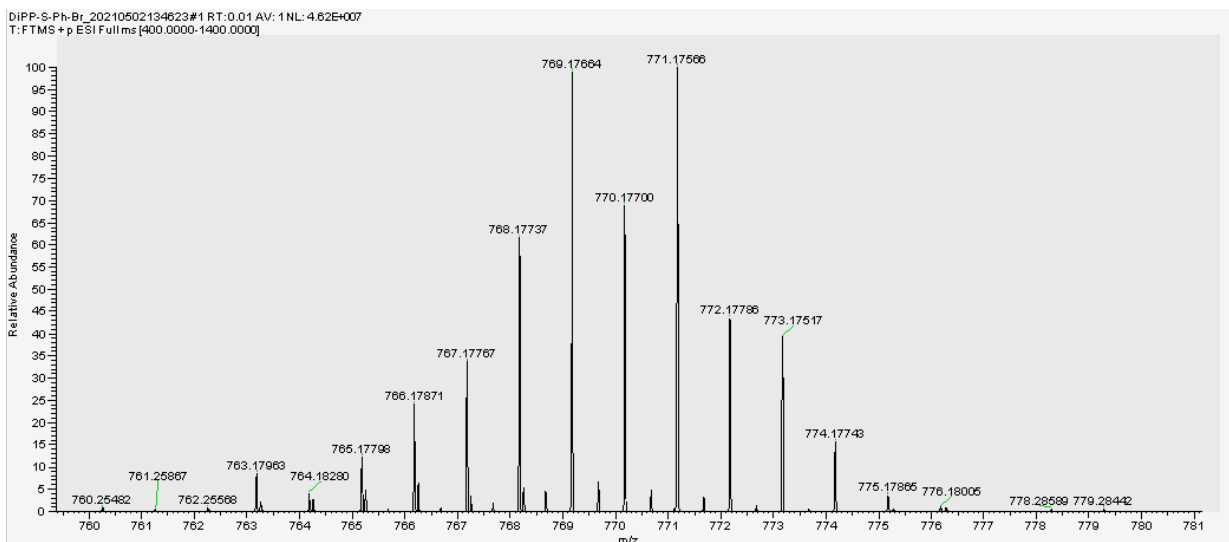

B)

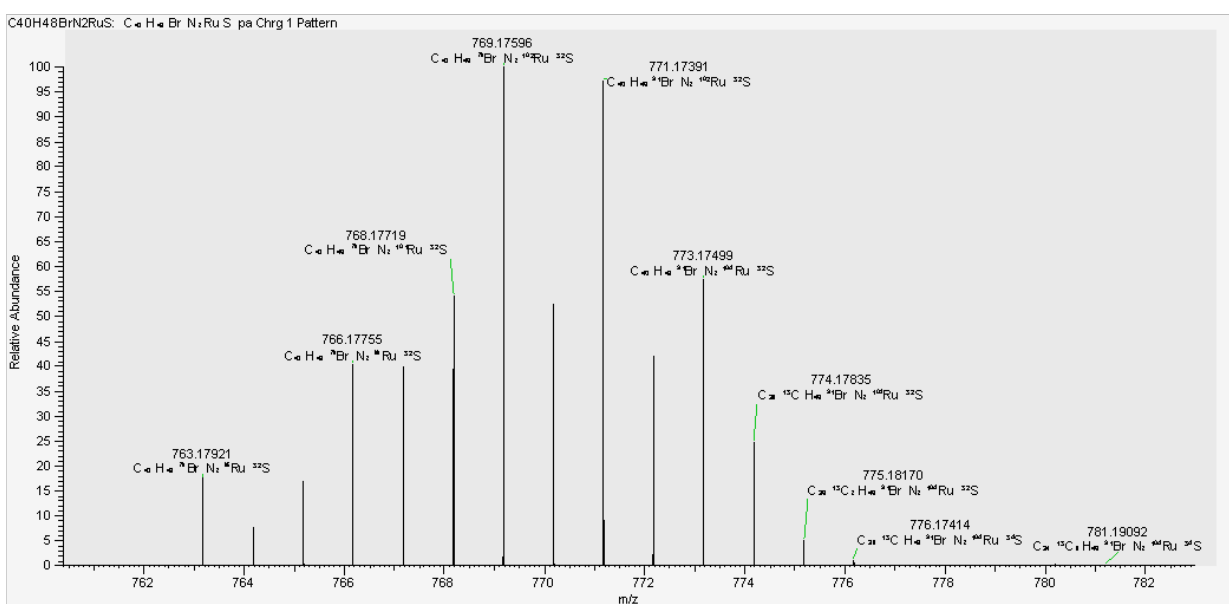

Figure S11. Experimental (A) and simulated (B) HRMS chromatogram of SIPr-SPh-Br<sub>2</sub>

**A)**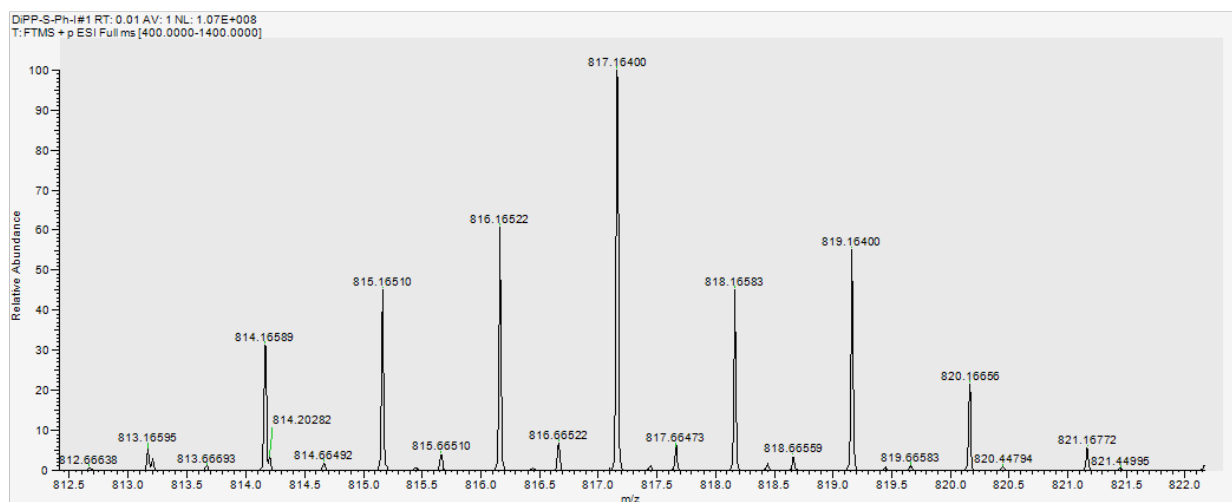**B)**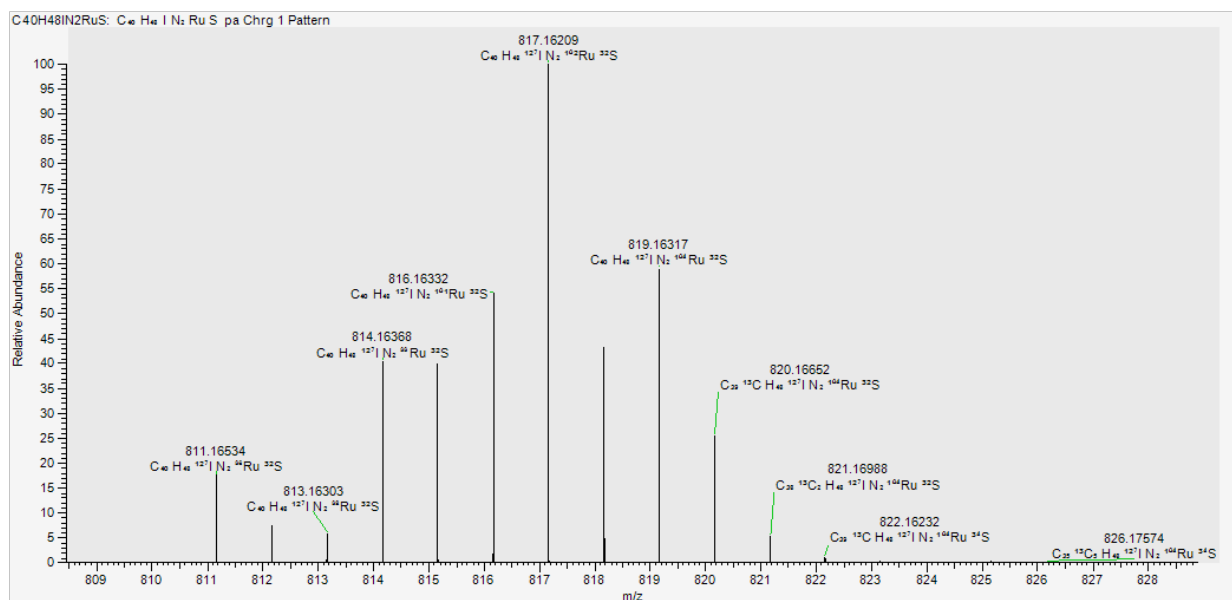

**Figure S12.** Experimental (A) and simulated (B) HRMS chromatogram of SIPr-SPh-I<sub>2</sub>

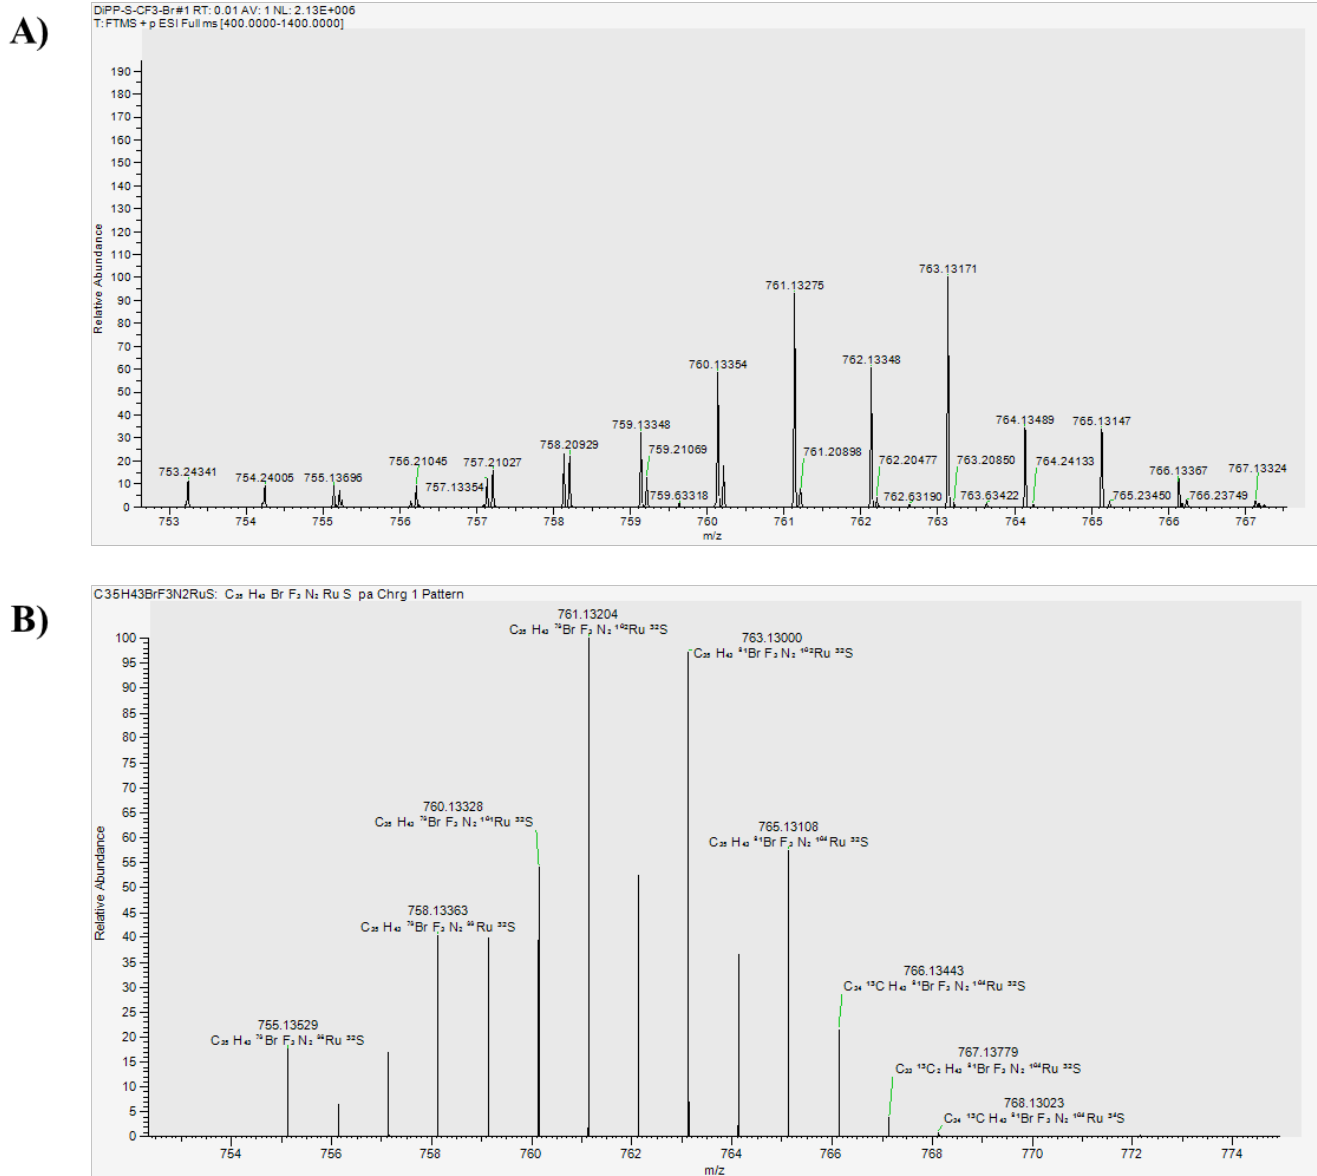

**Figure S13.** Experimental (A) and simulated (B) HRMS chromatogram of SIPr-SCF<sub>3</sub>-Br<sub>2</sub>

**A)**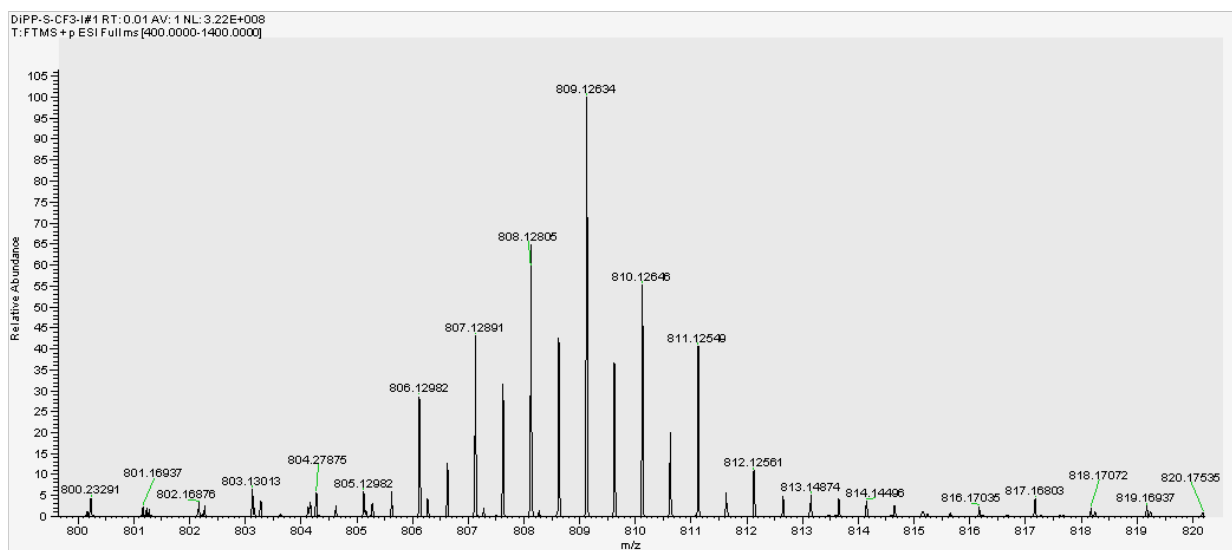**B)**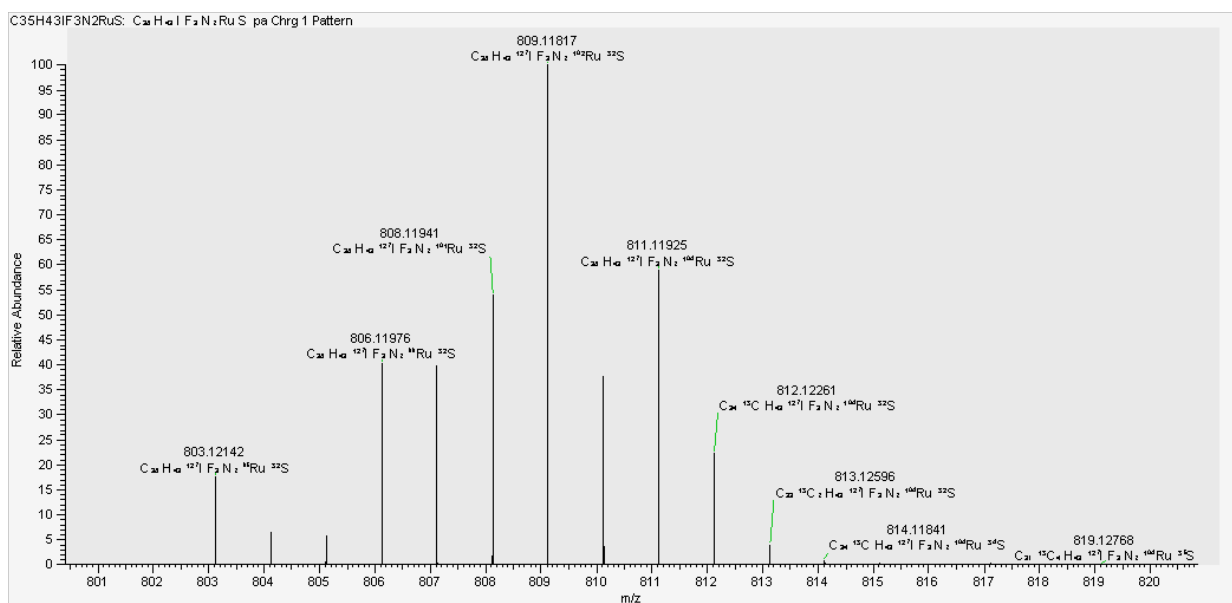

**Figure S14.** Experimental (A) and simulated (B) HRMS chromatogram of SIPr-SCF<sub>3</sub>-I<sub>2</sub>

## Part V. X-ray data

CCDC 2141615 and 2141616 of **SIMes-SPh-Br<sub>2</sub>** and **SIMes-SCF<sub>3</sub>-Br<sub>2</sub>** contain the supplementary crystallographic data for this paper. These data can be obtained free of charge via [www.ccdc.cam.ac.uk/data\\_request/cif](http://www.ccdc.cam.ac.uk/data_request/cif), or by emailing [data\\_request@ccdc.cam.ac.uk](mailto:data_request@ccdc.cam.ac.uk), or by contacting The Cambridge Crystallographic Data Centre, 12 Union Road Cambridge CB2 1EZ, UK; fax: +44 1223 336033.

**Table S1.** Crystallographic data of **SIMes-SPh-Br<sub>2</sub>** and **SIMes-SCF<sub>3</sub>-Br<sub>2</sub>**

|                                   | <b>SIMes-SPh-Br<sub>2</sub></b>                                    | <b>SIMes-SCF<sub>3</sub>-Br<sub>2</sub></b>                                       |
|-----------------------------------|--------------------------------------------------------------------|-----------------------------------------------------------------------------------|
| Chemical formula                  | C <sub>34</sub> H <sub>37</sub> Br <sub>2</sub> N <sub>2</sub> RuS | C <sub>29</sub> H <sub>32</sub> F <sub>3</sub> Br <sub>2</sub> N <sub>2</sub> RuS |
| Formula Weight                    | 766.6                                                              | 758.5                                                                             |
| Temperature (K)                   | 200.15                                                             | 200.15                                                                            |
| Crystal size (mm <sup>3</sup> )   | 0.09×0.06×0.06                                                     | 0.33×0.06×0.06                                                                    |
| Crystal system                    | triclinic                                                          | monoclinic                                                                        |
| Space group                       | P-1                                                                | P2 <sub>1</sub> /n                                                                |
| <i>a</i> (Å)                      | 10.261(2)                                                          | 8.3337(15)                                                                        |
| <i>b</i> (Å)                      | 11.332(3)                                                          | 30.607(6)                                                                         |
| <i>c</i> (Å)                      | 14.623(3)                                                          | 40.881(8)                                                                         |
| <i>α</i> (°)                      | 102.134(6)                                                         | 90                                                                                |
| <i>β</i> (°)                      | 104.895(5)                                                         | 95.485(5)                                                                         |
| <i>γ</i> (°)                      | 96.574(6)                                                          | 90                                                                                |
| Volume (Å <sup>3</sup> )          | 1580.6(6)                                                          | 10380(3)                                                                          |
| <i>Z</i>                          | 2                                                                  | 12                                                                                |
| <i>ρ</i> (g cm <sup>-3</sup> )    | 1.611                                                              | 1.456                                                                             |
| <i>μ</i> (mm <sup>-1</sup> )      | 3.116                                                              | 2.858                                                                             |
| <i>F</i> (000)                    | 770.0                                                              | 4524.0                                                                            |
| Radiation                         | MoK $\alpha$ ( $\lambda$ =0.71073)                                 | MoK $\alpha$ ( $\lambda$ =0.71073)                                                |
| <i>hkl</i> range                  | -12 ≤ <i>h</i> ≤ 8                                                 | -9 ≤ <i>h</i> ≤ 9                                                                 |
|                                   | -13 ≤ <i>k</i> ≤ 13                                                | 35 ≤ <i>k</i> ≤ 33                                                                |
|                                   | -13 ≤ <i>l</i> ≤ 17                                                | -45 ≤ <i>l</i> ≤ 45                                                               |
| No. of reflections collected      | 9689                                                               | 47529                                                                             |
| Independent reflections           | 5417<br>[R <sub>int</sub> = 0.1553, R <sub>σ</sub> = 0.2445]       | 15831<br>[R <sub>int</sub> = 0.2217, R <sub>σ</sub> = 0.4019]                     |
| No. of parameters                 | 361                                                                | 1003                                                                              |
| Goodness-of-fit on F <sup>2</sup> | 0.863                                                              | 0.908                                                                             |
| Final R indexes [I ≥ 2σ (I)]      | R <sub>1</sub> = 0.0608, wR <sub>2</sub> = 0.1159                  | R <sub>1</sub> = 0.0793, wR <sub>2</sub> = 0.1283                                 |

**Part VI. *Cis-trans* Isomerization studies following heating at 80 °C**

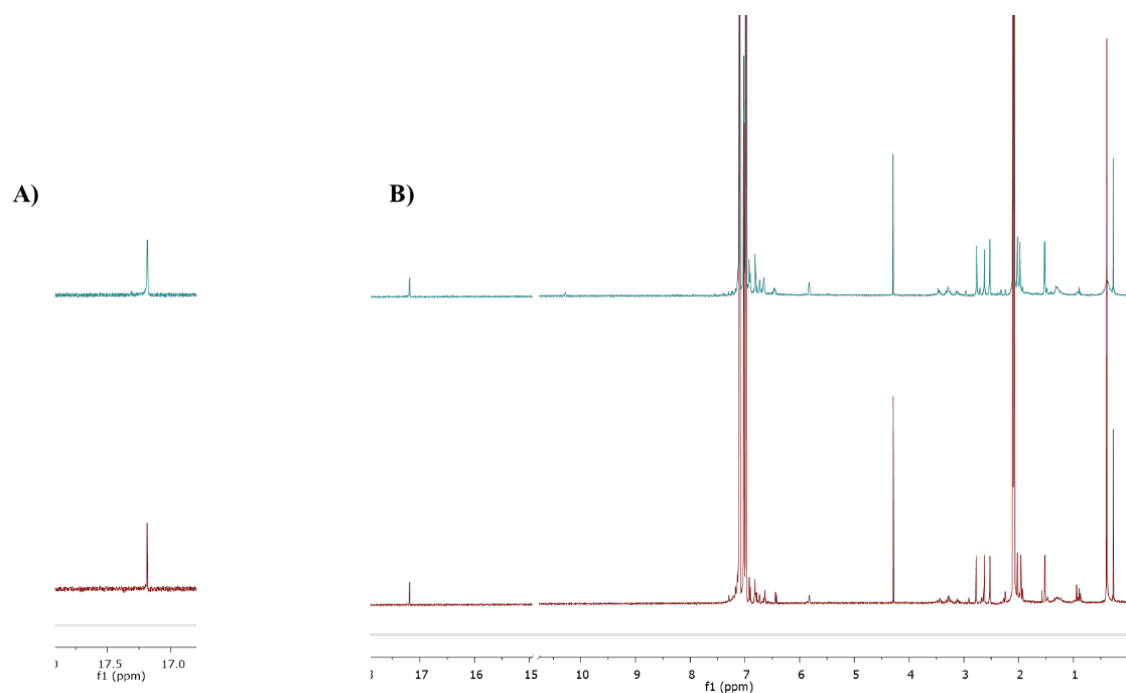

**Figure S15.** <sup>1</sup>H NMR analysis following isomerization of **SIMes-SPh-Cl<sub>2</sub>** at 80°C in toluene-d<sub>8</sub> at *t* = 0 (bottom) and *t* = 4 h at equilibrium (top): A) Zoom-in of the carbene region (% isomerization < 1), B) the full spectra.

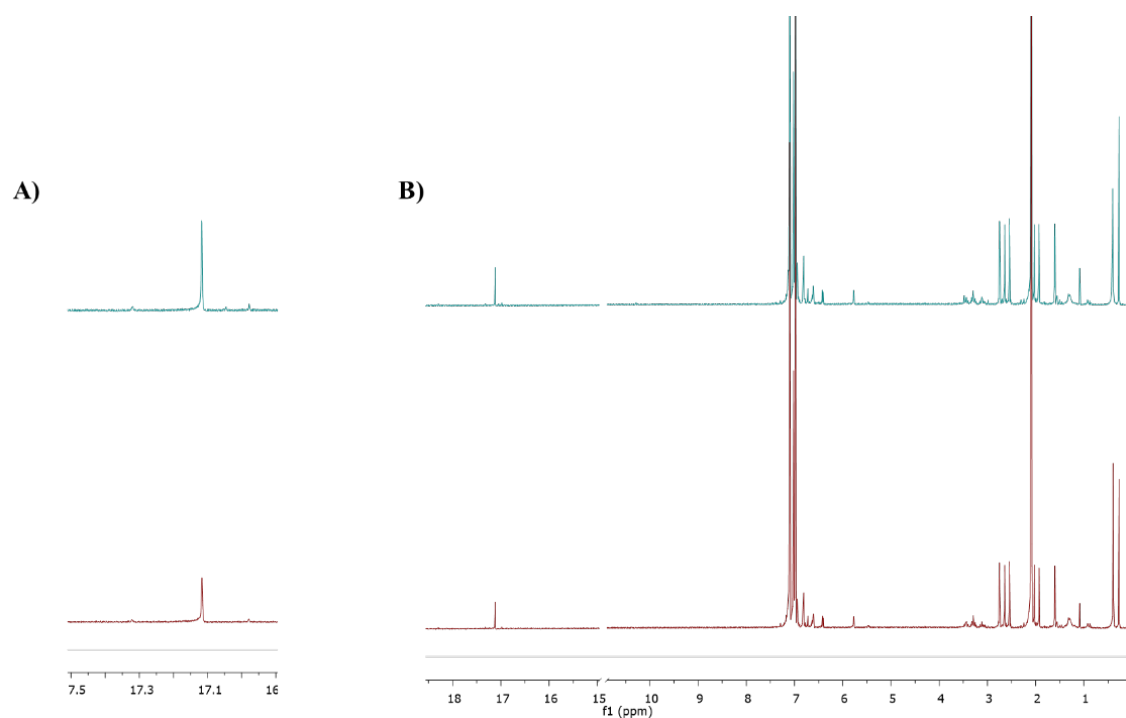

**Figure S16.** <sup>1</sup>H NMR analysis following isomerization of **SIMes-SPh-Br<sub>2</sub>** at 80°C in toluene-d<sub>8</sub> at *t* = 0 (bottom) and *t* = 4 h at equilibrium (top): A) Zoom-in of the carbene region (% isomerization < 1), B) the full spectra.

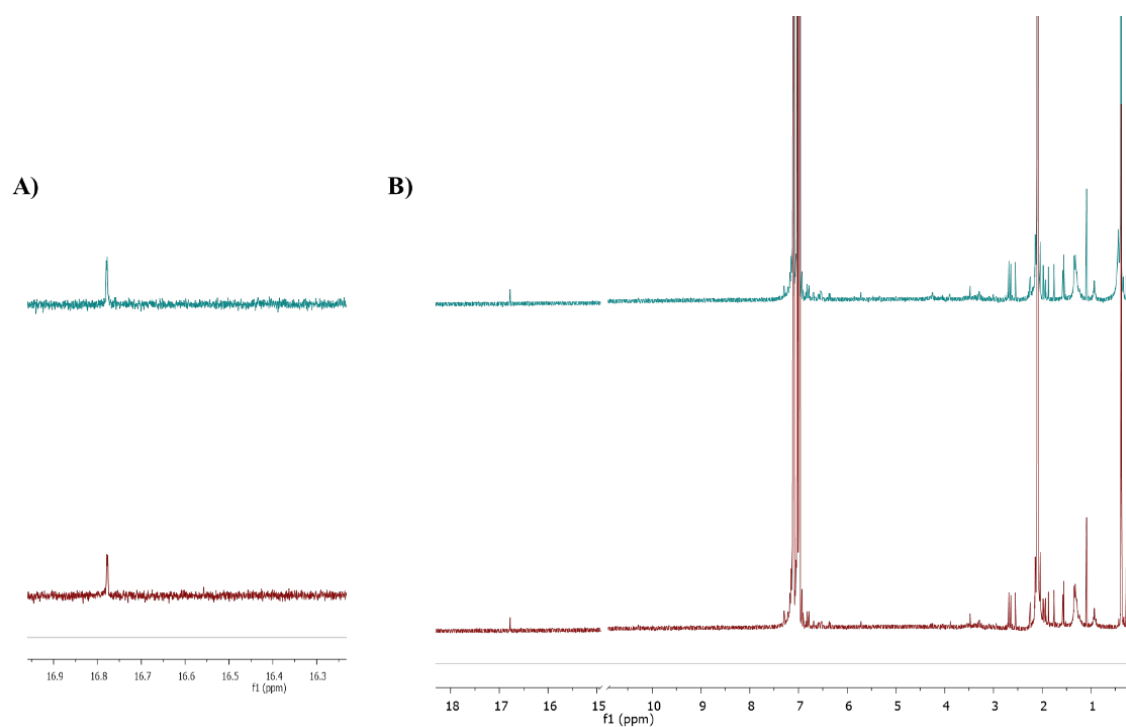

**Figure S17.**  $^1\text{H}$  NMR analysis following isomerization of **SIMes-SPh-I<sub>2</sub>** at  $80^\circ\text{C}$  in toluene- $\text{d}_8$  at  $t = 0$  (bottom) and  $t = 4$  h at equilibrium (top): A) Zoom-in of the carbene region (% isomerization < 1) B) the full spectra.

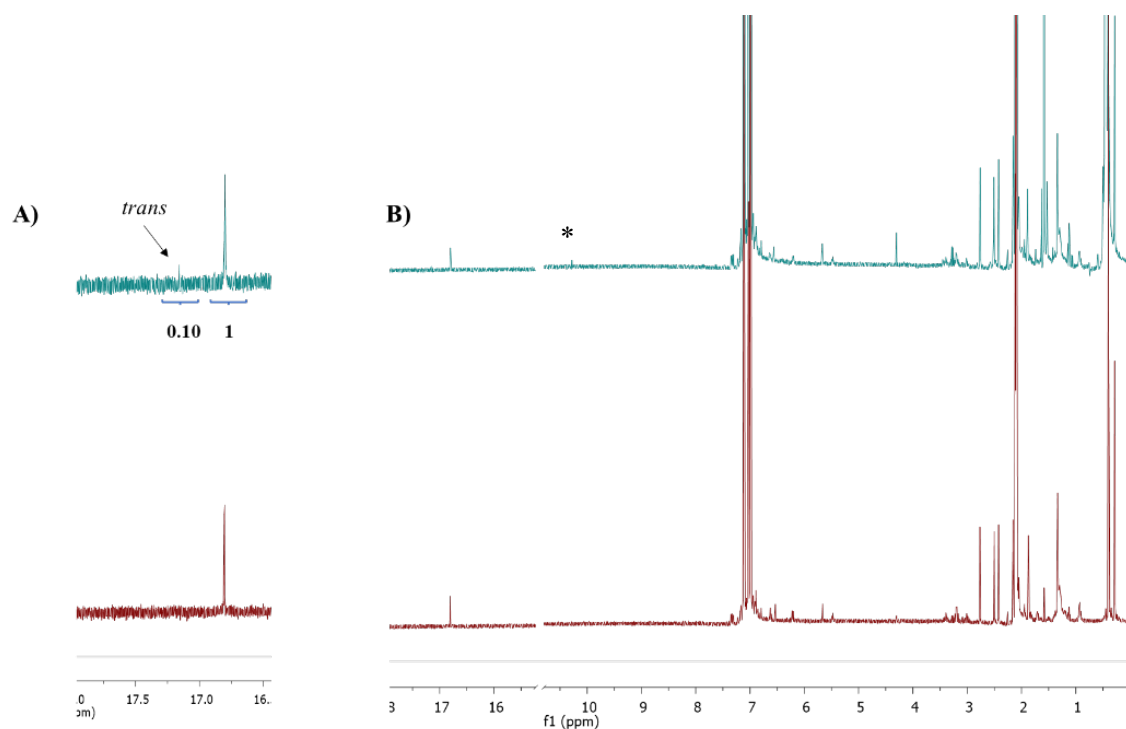

**Figure S18.**  $^1\text{H}$  NMR analysis following isomerization of **SIMes-SCF<sub>3</sub>-Cl<sub>2</sub>** at  $80^\circ\text{C}$  in toluene- $\text{d}_8$  at  $t = 0$  (bottom) and  $t = 3$  h at equilibrium (top): A) Zoom-in of the carbene region (% isomerization = 9) B) the full spectra.

\*9% decomposition

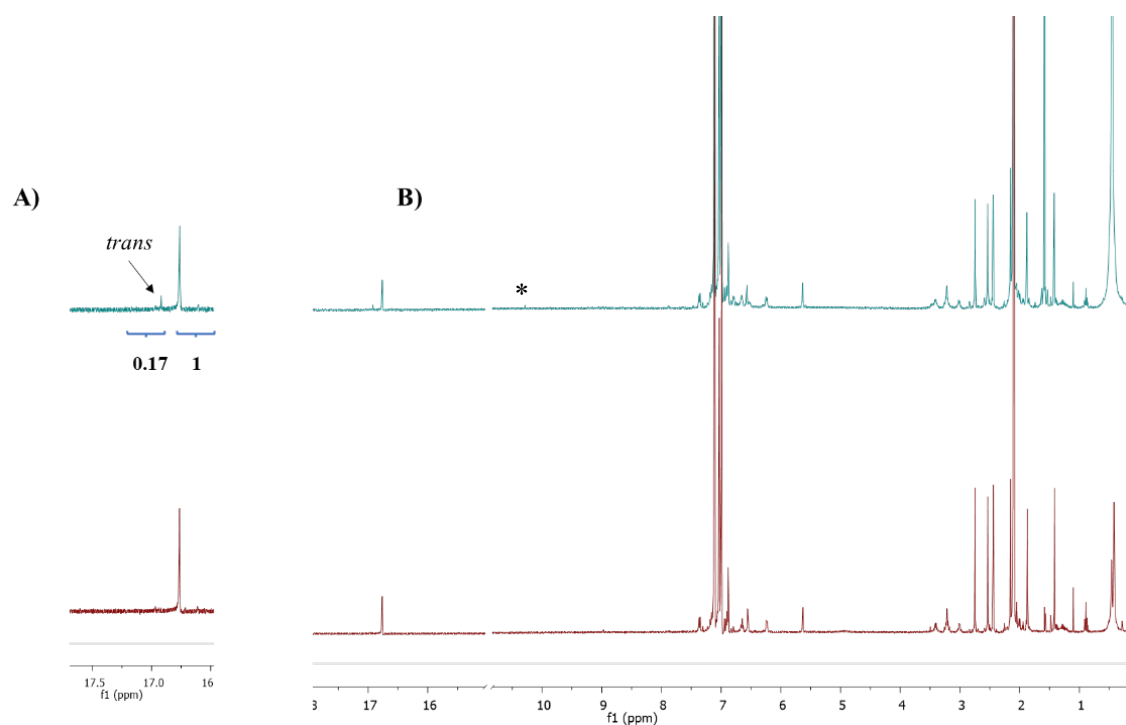

**Figure S19.**  $^1\text{H}$  NMR analysis following isomerization of **SIMes-SCF<sub>3</sub>-Br<sub>2</sub>** at 80°C in toluene- $d_8$  at  $t = 0$  (bottom) and  $t = 1.5$  h at equilibrium (top): A) Zoom-in of the carbene region (% isomerization = 17) B) the full spectra.

\*7% decomposition

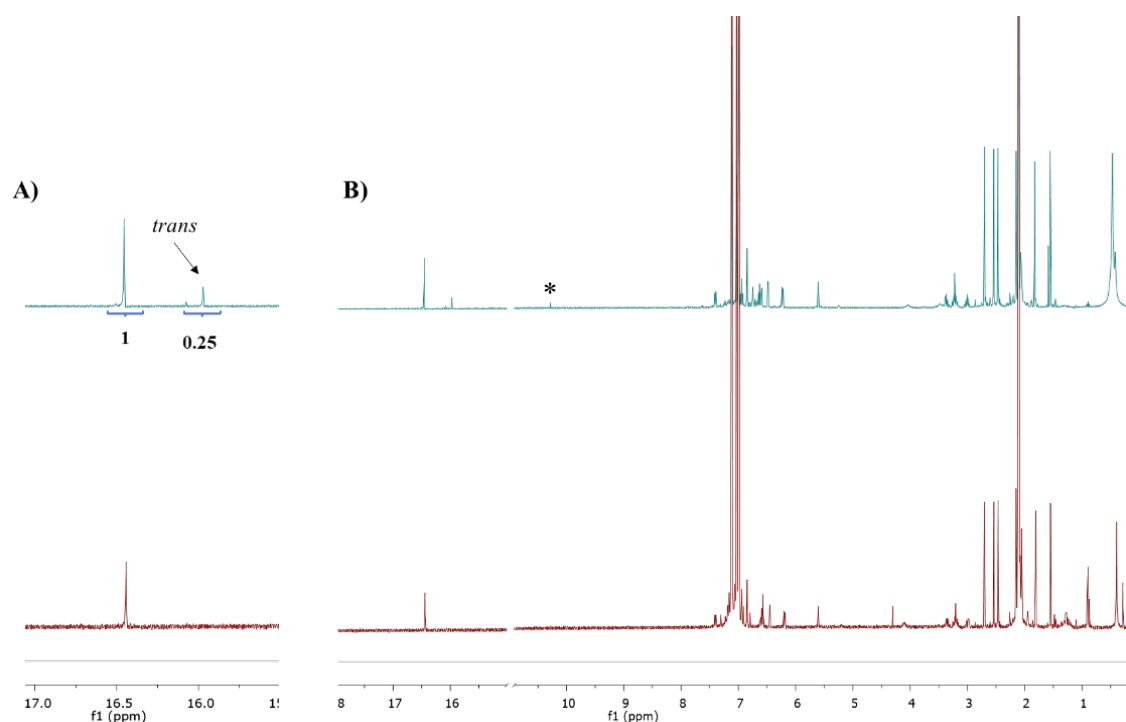

**Figure S20.**  $^1\text{H}$  NMR analysis following isomerization of **SIMes-SCF<sub>3</sub>-I<sub>2</sub>** at 80°C in toluene- $d_8$  at  $t = 0$  (bottom) and  $t = 15$  min. at equilibrium (top): A) Zoom-in of the carbene region (% isomerization = 20) B) the full spectra.

\*7% decomposition



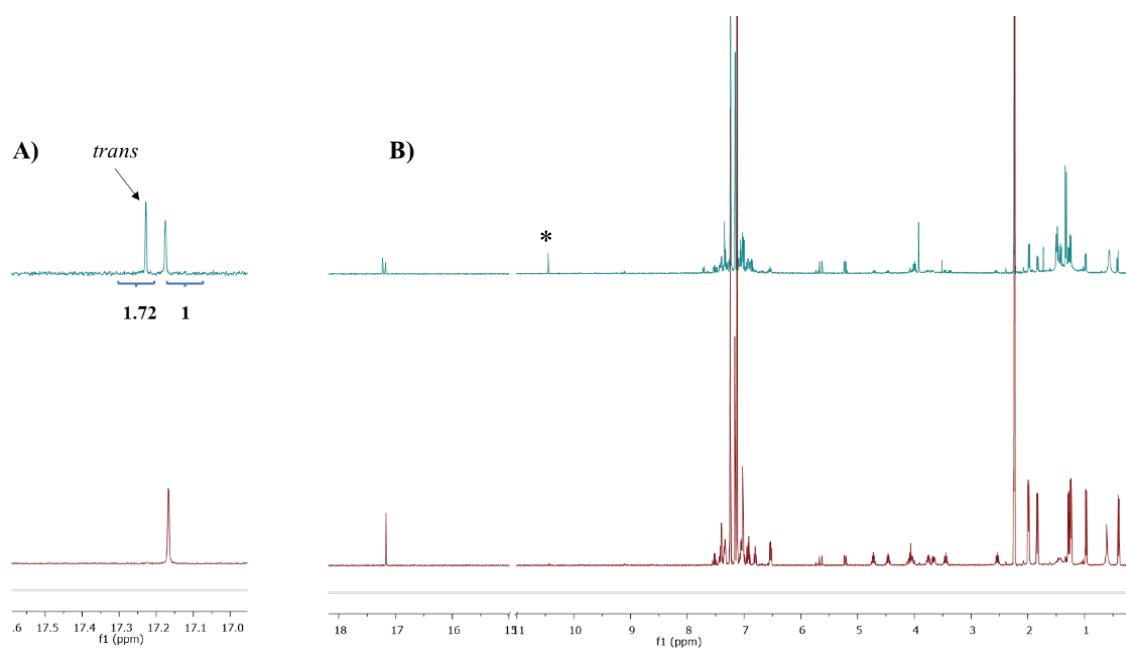

**Figure S21.**  $^1\text{H}$  NMR analysis following isomerization of **SIPr-SPh-Cl<sub>2</sub>** at  $80^\circ\text{C}$  in toluene- $\text{d}_8$  at  $t = 0$  (bottom) and  $t = 3$  h at equilibrium (top): A) Zoom-in of the carbene region (% isomerization = 63) B) the full spectra.

\*29% decomposition

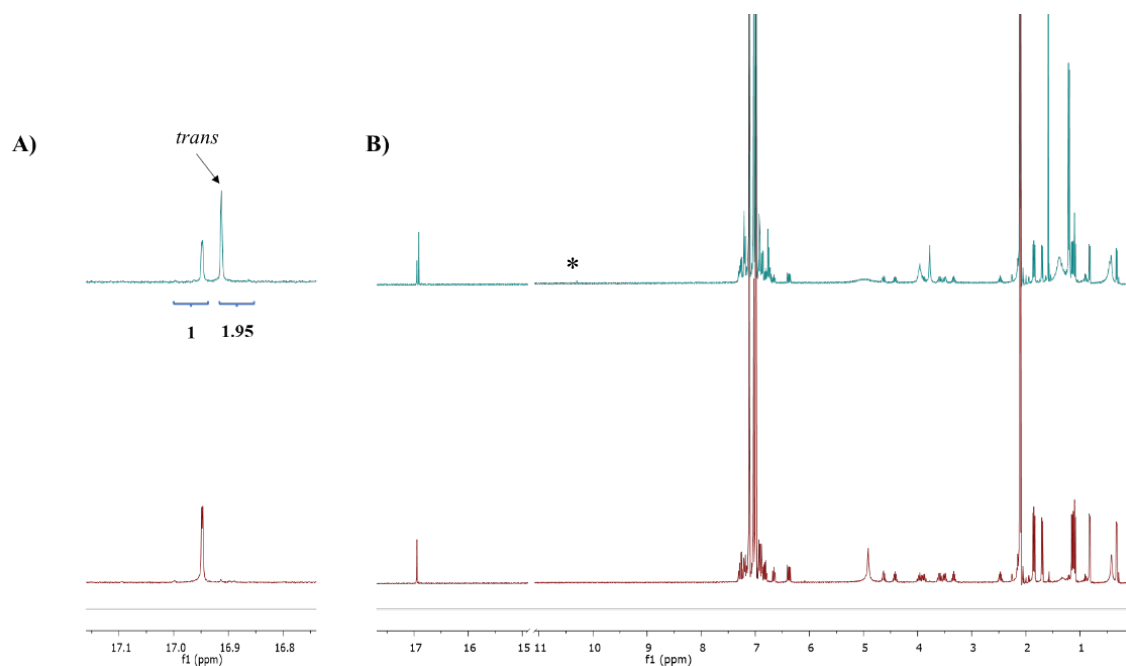

**Figure S22.**  $^1\text{H}$  NMR analysis following isomerization of **SIPr-SPh-Br<sub>2</sub>** at  $80^\circ\text{C}$  in toluene- $\text{d}_8$  at  $t = 0$  (bottom) and  $t = 1.5$  h at equilibrium (top): A) Zoom-in of the carbene region (% isomerization = 66) B) the full spectra.

\*1% decomposition

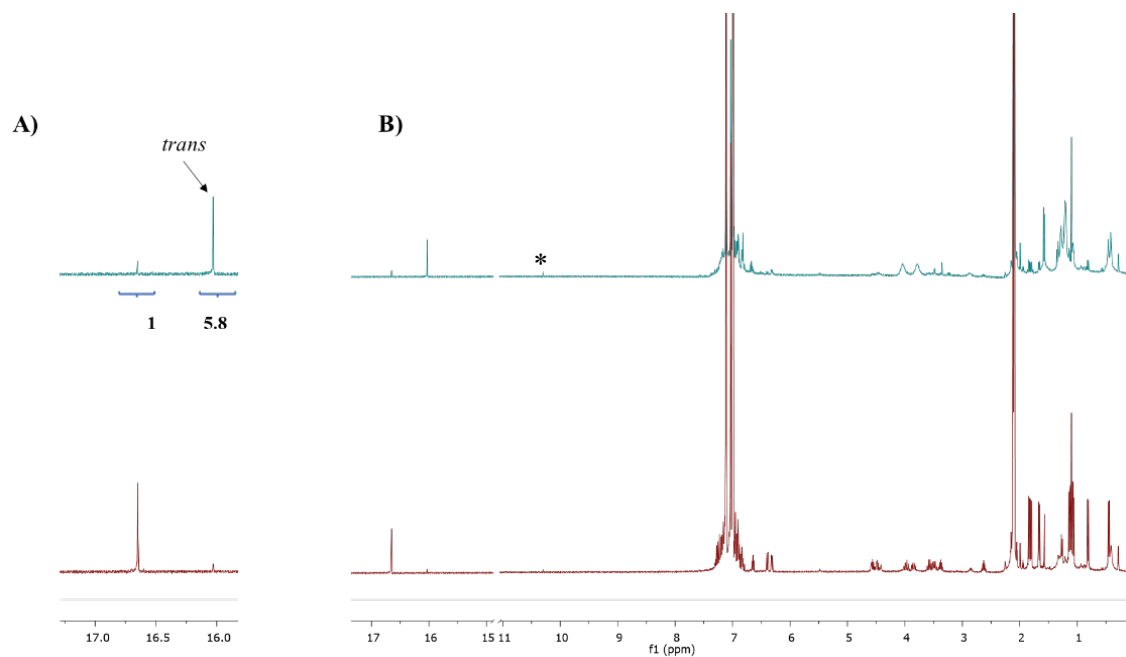

**Figure S23.**  $^1\text{H}$  NMR analysis following isomerization of **SIPr-SPh-I<sub>2</sub>** at 80°C in toluene- $d_8$  at  $t = 0$  (bottom) and  $t = 15$  min. at equilibrium (top): A) Zoom-in of the carbene region (% isomerization = 85) B) the full spectra.

\*4% decomposition

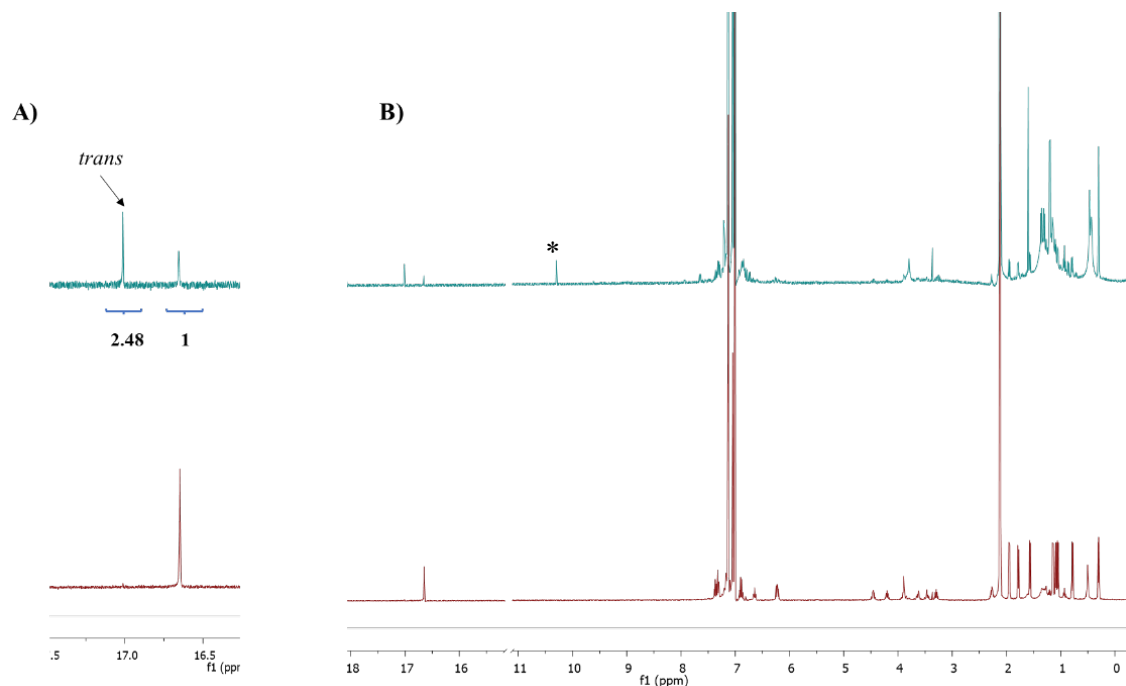

**Figure S24.**  $^1\text{H}$  NMR analysis following isomerization of **SIPr-SCF<sub>3</sub>-Cl<sub>2</sub>** at 80°C in toluene- $d_8$  at  $t = 0$  (bottom) and  $t = 2$  h at equilibrium (top): A) Zoom-in of the carbene region (% isomerization = 71) B) the full spectra.

\*30% decomposition

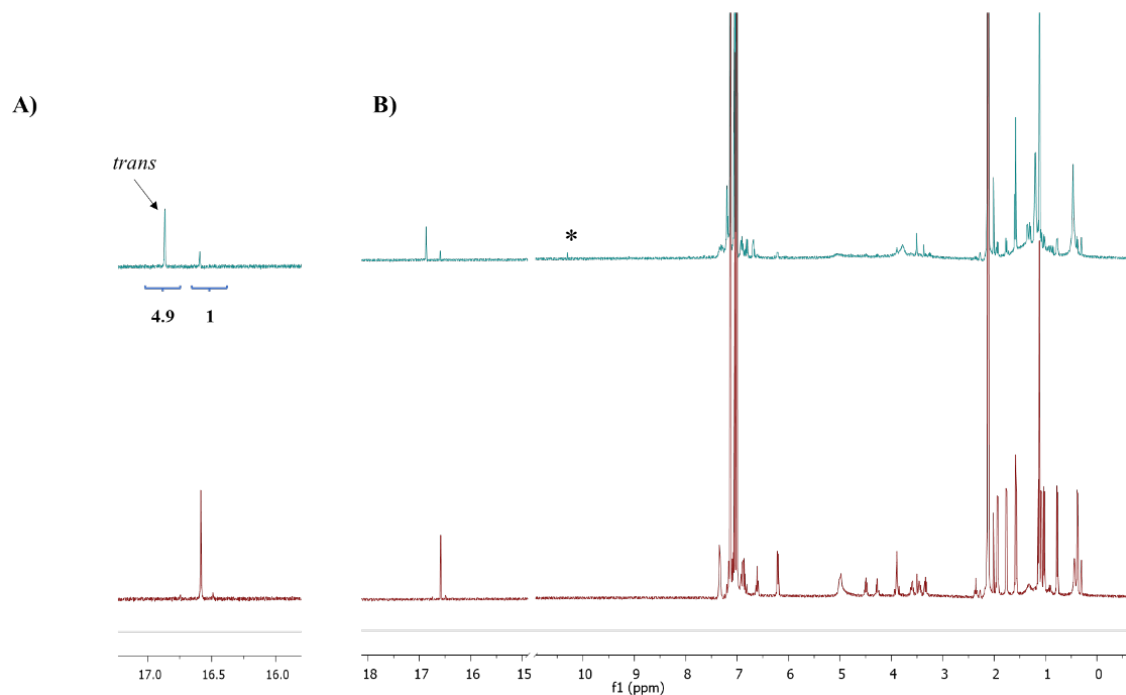

**Figure S25.**  $^1\text{H}$  NMR analysis following isomerization of **SIPr-SCF<sub>3</sub>-Br<sub>2</sub>** at 80°C in toluene- $d_8$  at  $t = 0$  (bottom) and  $t = 1.5$  h at equilibrium (top): A) Zoom-in of the carbene region (% isomerization = 80) B) the full spectra.

\*6% decomposition

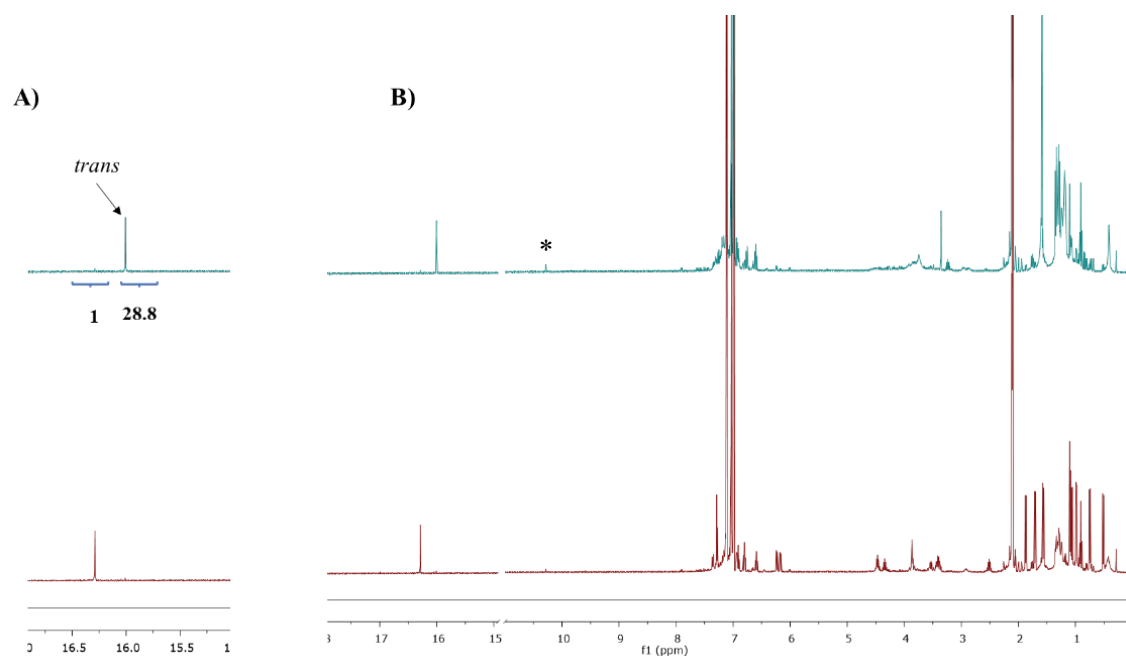

**Figure S26.**  $^1\text{H}$  NMR analysis following isomerization of **SIPr-SCF<sub>3</sub>-I<sub>2</sub>** at 80°C in toluene- $d_8$  at  $t = 0$  (bottom) and  $t = 15$  min. at equilibrium (top): A) Zoom-in of the carbene region (% isomerization = 97) B) the full spectra.

\*6% decomposition

Part VII. *cis-trans* photoisomerization studies following irradiation at 350 nm

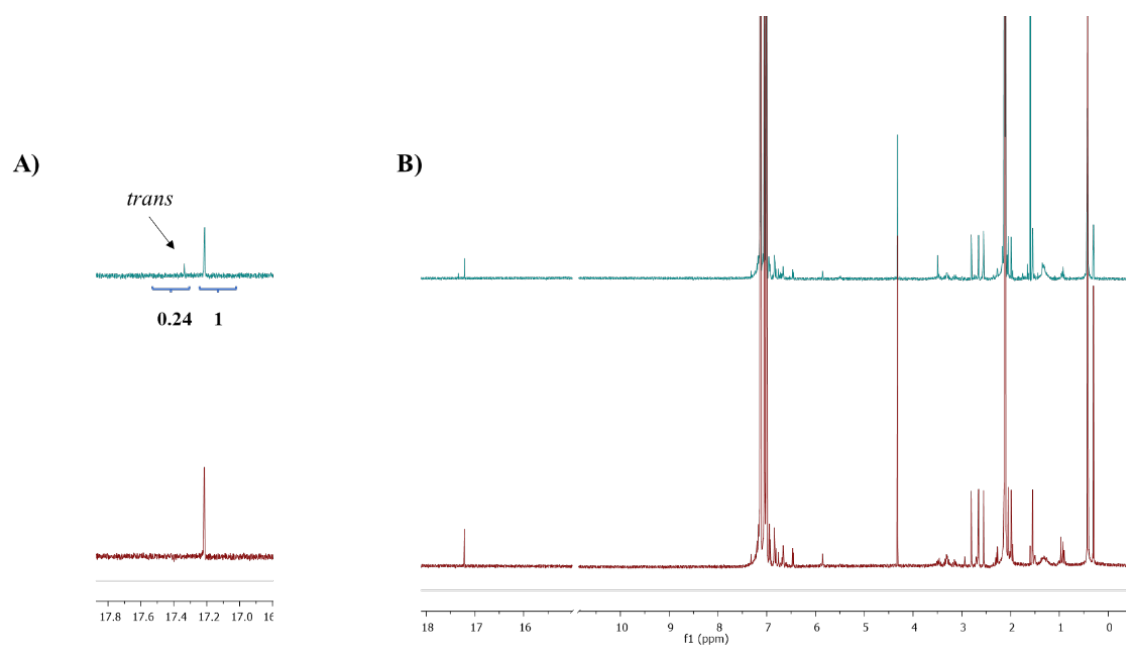

**Figure S27.** <sup>1</sup>H NMR analysis following isomerization of **SIMes-SPh-Cl<sub>2</sub>** before (bottom) and after irradiation at 350 nm in toluene-d<sub>8</sub> for 2 h (top): A) Zoom-in of the carbene region (% isomerization = 19); B) the full spectra.

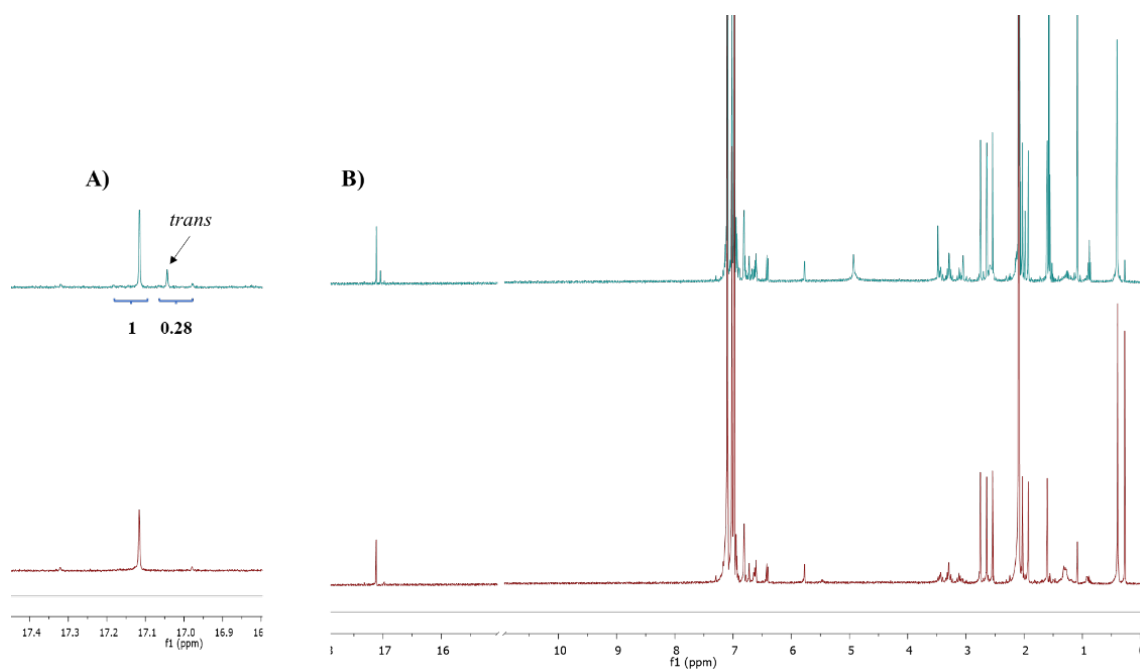

**Figure S28.** <sup>1</sup>H NMR analysis following isomerization of **SIMes-SPh-Br<sub>2</sub>** before (bottom) and after irradiation at 350 nm in toluene-d<sub>8</sub> for 2 h (top): A) Zoom-in of the carbene region (% isomerization = 22); B) the full spectra.

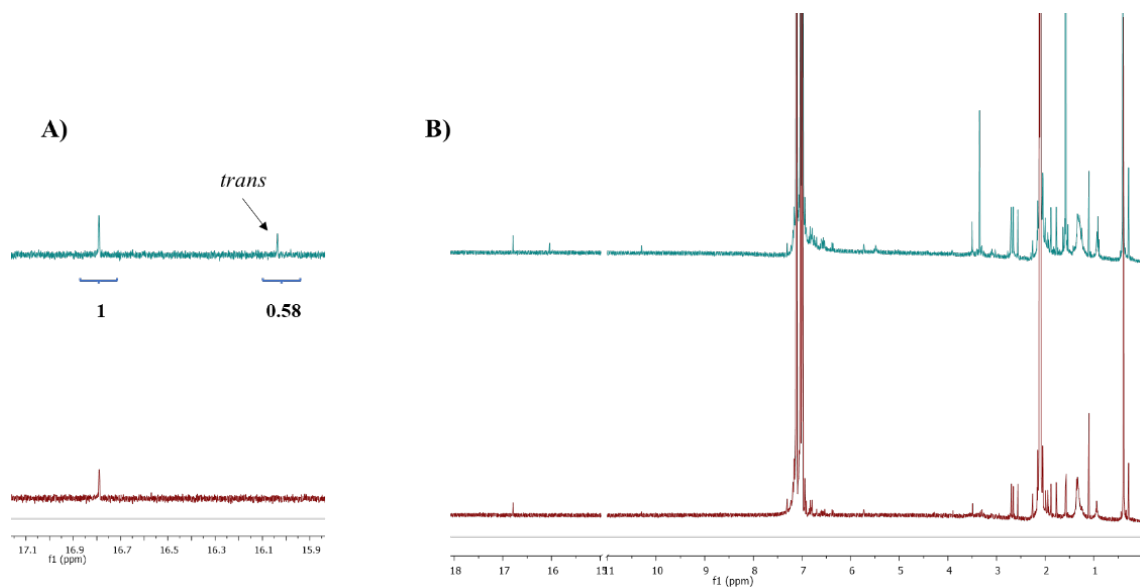

**Figure S29.**  $^1\text{H}$  NMR analysis following isomerization of **SIMes-SPh-I<sub>2</sub>** before (bottom) and after irradiation at 350 nm in toluene- $d_8$  for 2 h (top): A) Zoom-in of the carbene region (% isomerization = 37); B) the full spectra.

\*10% decomposition

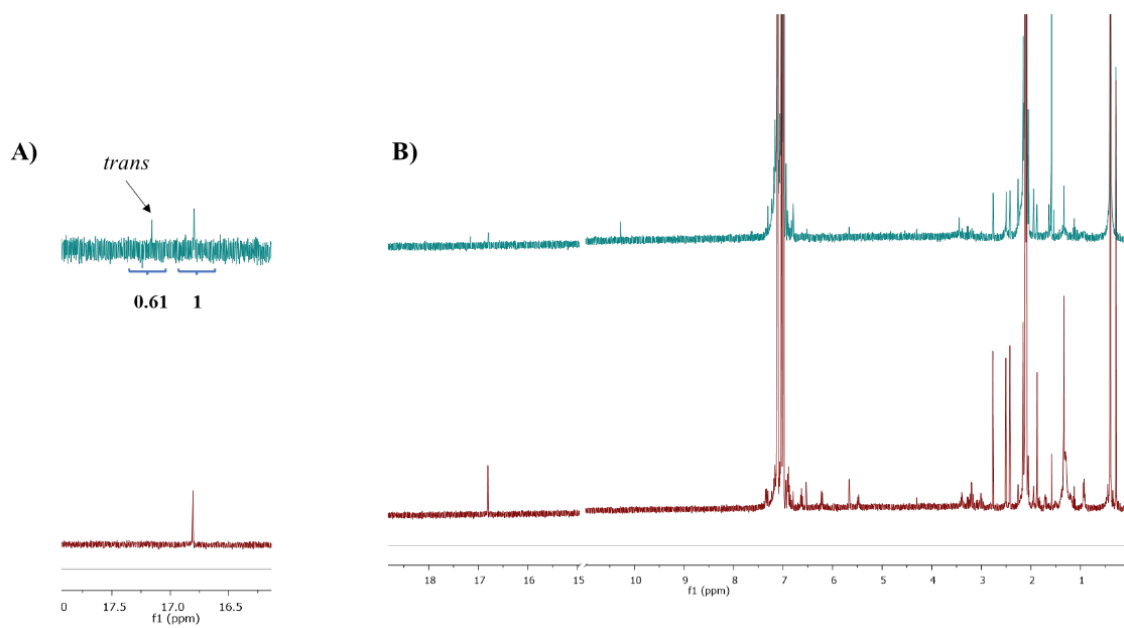

**Figure S30.**  $^1\text{H}$  NMR analysis following isomerization of **SIMes-SCF<sub>3</sub>-Cl<sub>2</sub>** before (bottom) and after irradiation at 350 nm in toluene- $d_8$  for 2 h (top): A) Zoom-in of the carbene region (% isomerization = 38); B) the full spectra.

\*35% decomposition

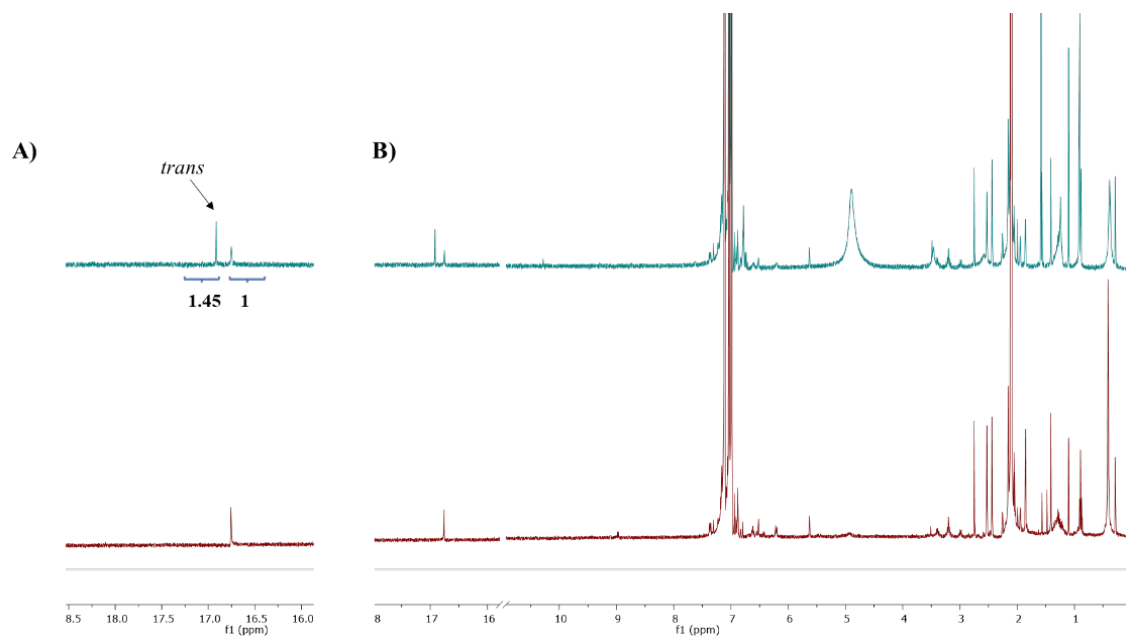

**Figure S31.**  $^1\text{H}$  NMR analysis following isomerization of **SIMes-SCF<sub>3</sub>-Br<sub>2</sub>** before (bottom) and after irradiation at 350 nm in toluene- $d_8$  for 2 h (top): A) Zoom-in of the carbene region (% isomerization = 59); B) the full spectra.

\*4% decomposition

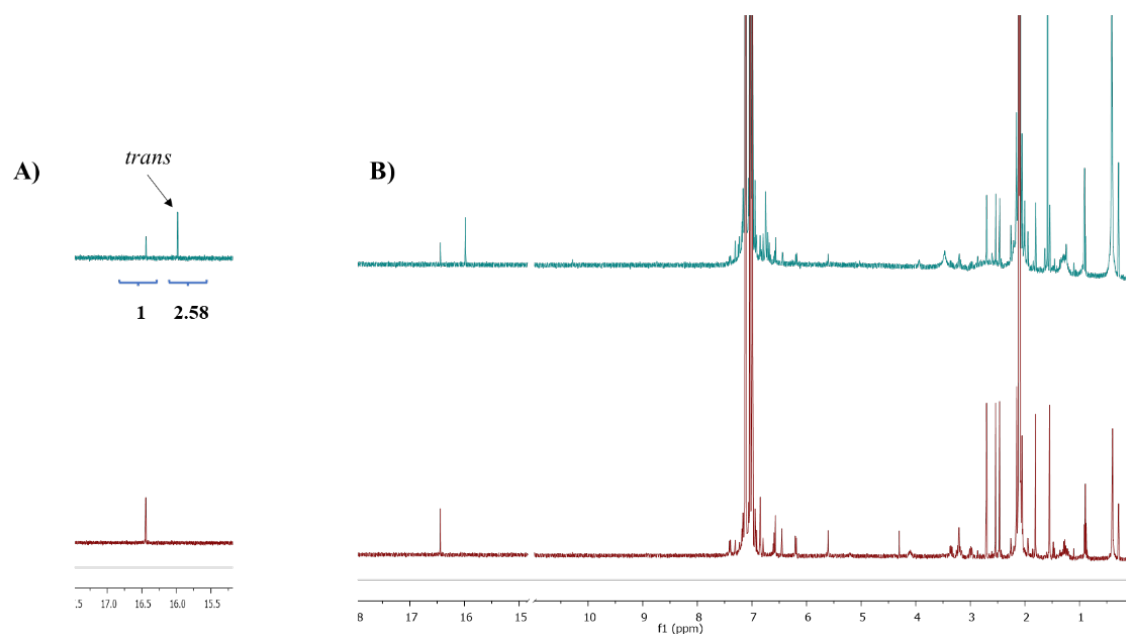

**Figure S32.**  $^1\text{H}$  NMR analysis following isomerization of **SIMes-SCF<sub>3</sub>-I<sub>2</sub>** before (bottom) and after irradiation at 350 nm in toluene- $d_8$  for 2 h (top): A) Zoom-in of the carbene region (% isomerization = 72); B) the full spectra.

\*6% decomposition

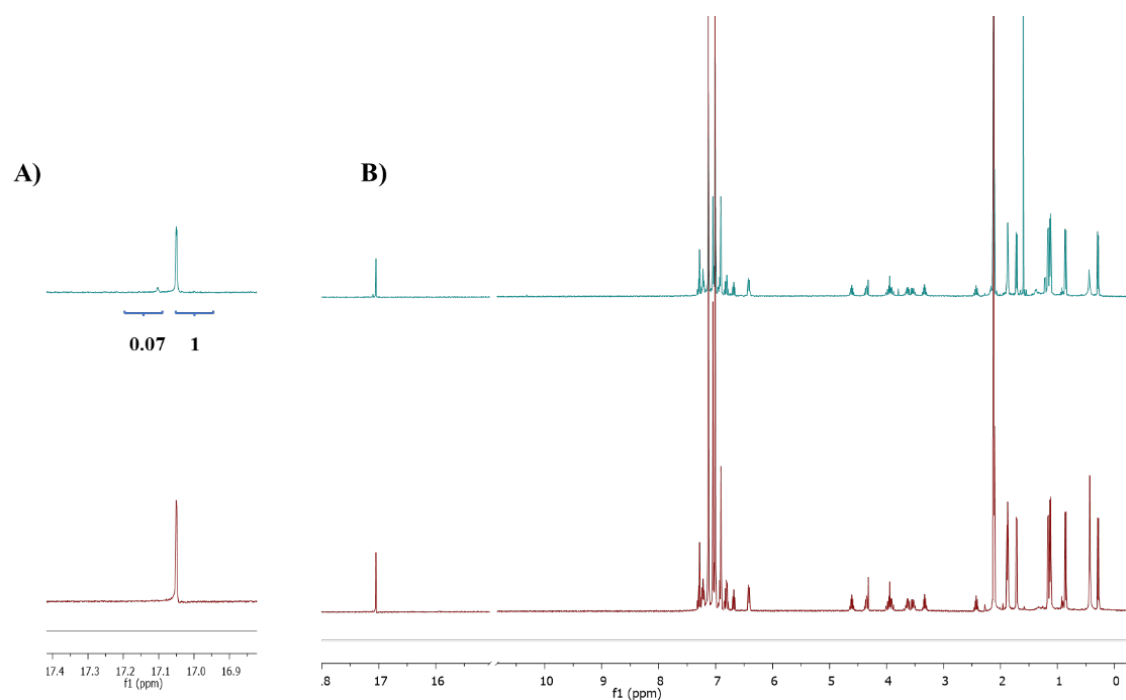

**Figure S33.**  $^1\text{H}$  NMR analysis following isomerization of **SIPr-SPh-Cl<sub>2</sub>** before (bottom) and after irradiation at 350 nm in toluene- $d_8$  for 2 h (top): A) Zoom-in of the carbene region (% isomerization = 7); B) the full spectra.

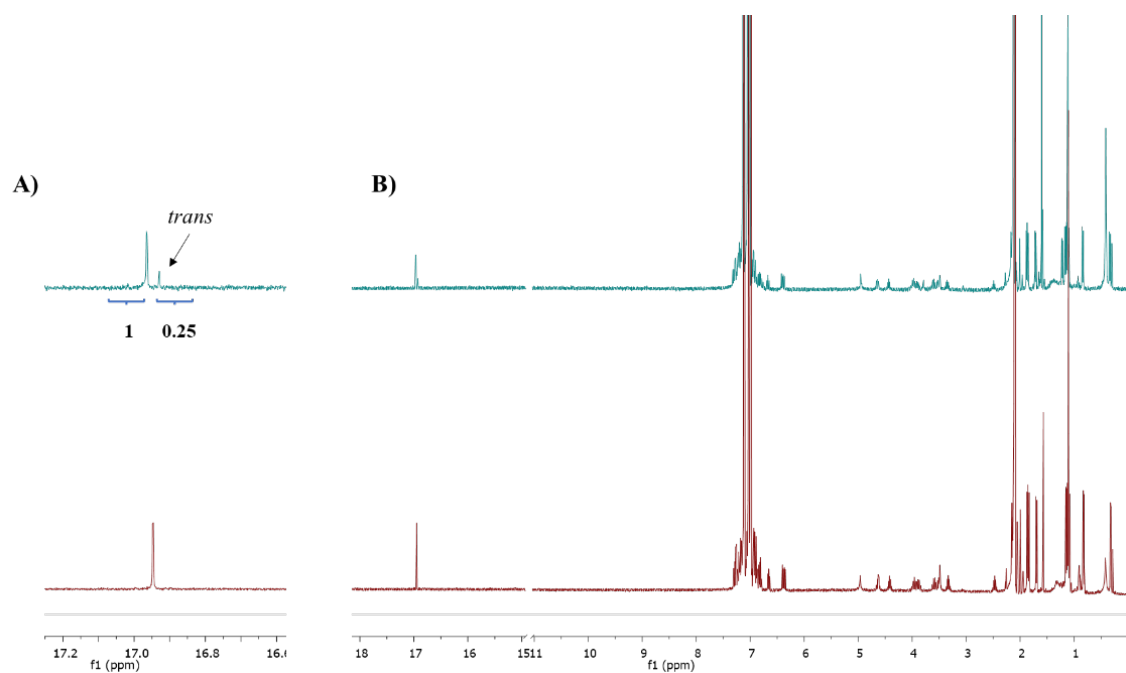

**Figure S34.**  $^1\text{H}$  NMR analysis following isomerization of **SIPr-SPh-Br<sub>2</sub>** before (bottom) and after irradiation at 350 nm in toluene- $d_8$  for 2 h (top): A) Zoom-in of the carbene region (% isomerization = 20); B) the full spectra.

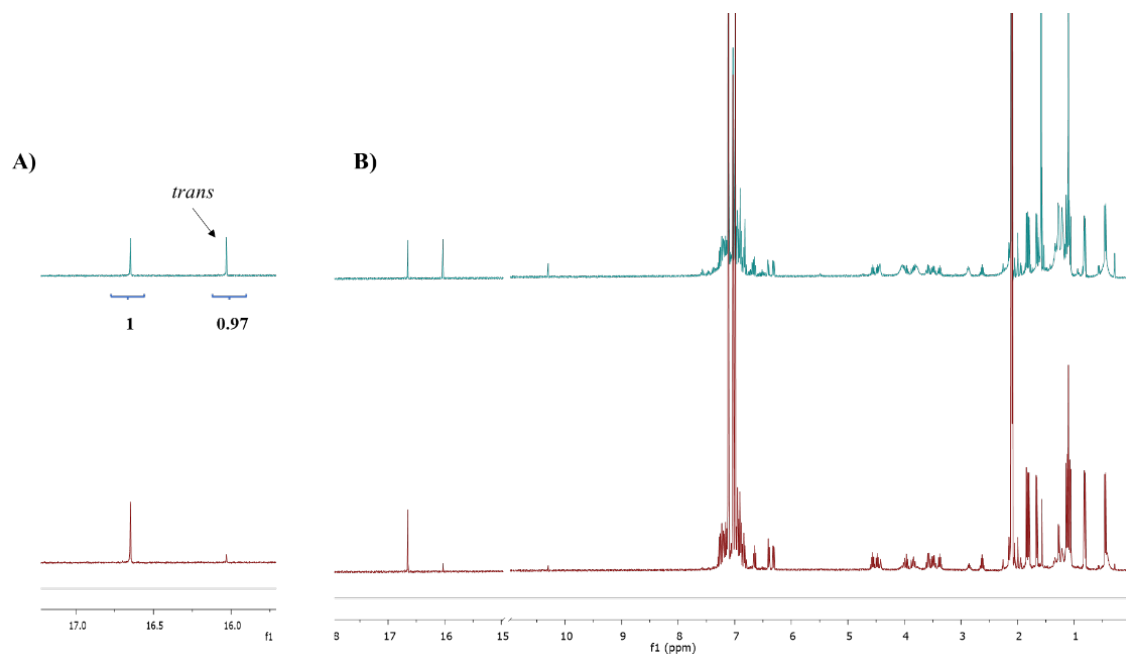

**Figure S35.**  $^1\text{H}$  NMR analysis following isomerization of **SIPr-SPh-I<sub>2</sub>** before (bottom) and after irradiation at 350 nm in toluene- $d_8$  for 2 h (top): A) Zoom-in of the carbene region (% isomerization = 49); B) the full spectra

\*8% decomposition

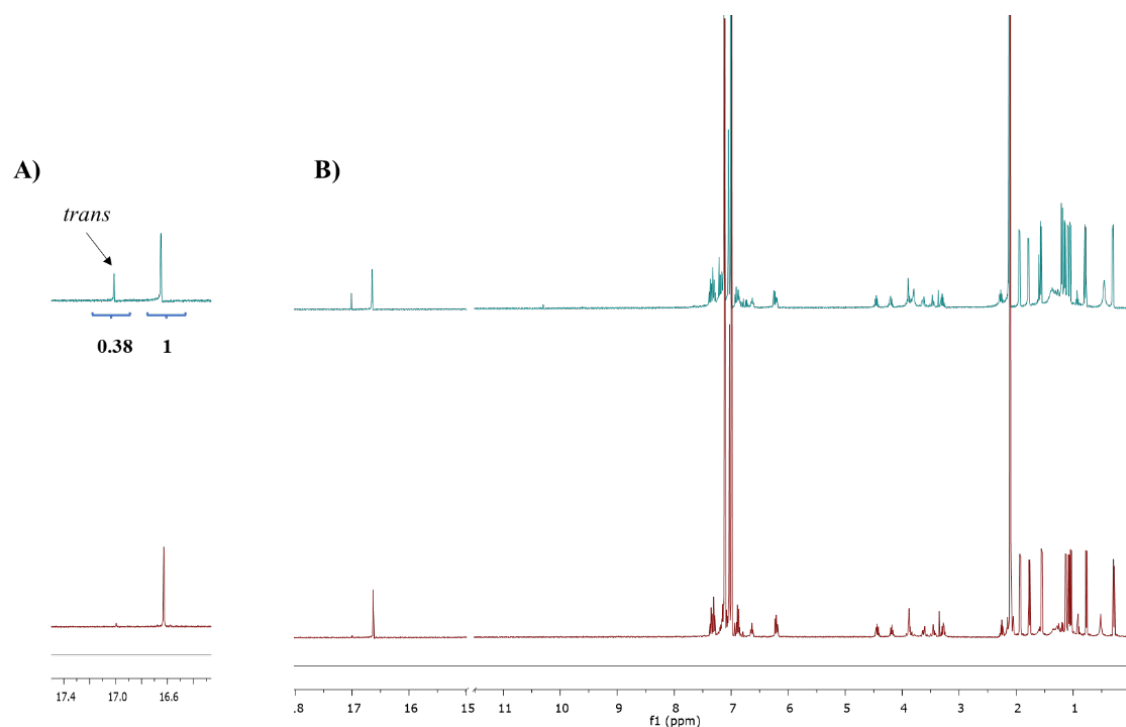

**Figure S36.**  $^1\text{H}$  NMR analysis following isomerization of **SIPr-SCF<sub>3</sub>-Cl<sub>2</sub>** before (bottom) and after irradiation at 350 nm in toluene- $d_8$  for 2 h (top): A) Zoom-in of the carbene region (% isomerization = 28); B) the full spectra

\*6% decomposition



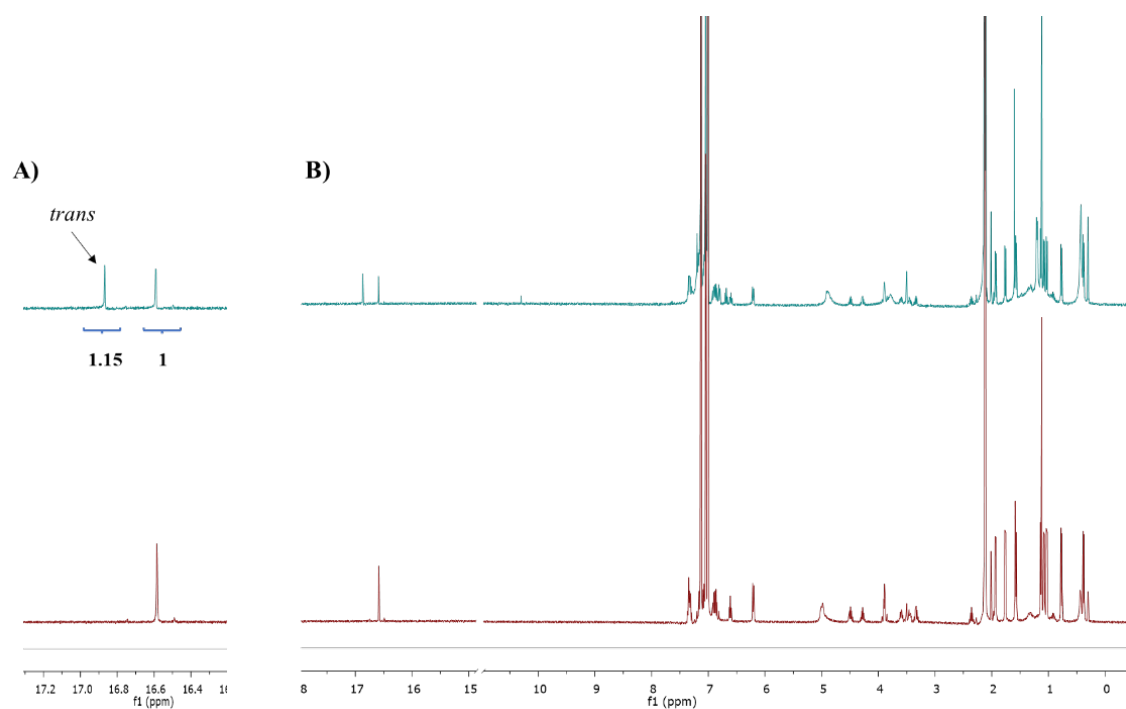

**Figure S37.**  $^1\text{H}$  NMR analysis following isomerization of **SIPr-SPh-Br<sub>2</sub>** before (bottom) and after irradiation at 350 nm in toluene- $d_8$  for 2 h (top): A) Zoom-in of the carbene region (% isomerization = 54); B) the full spectra

\*8% decomposition

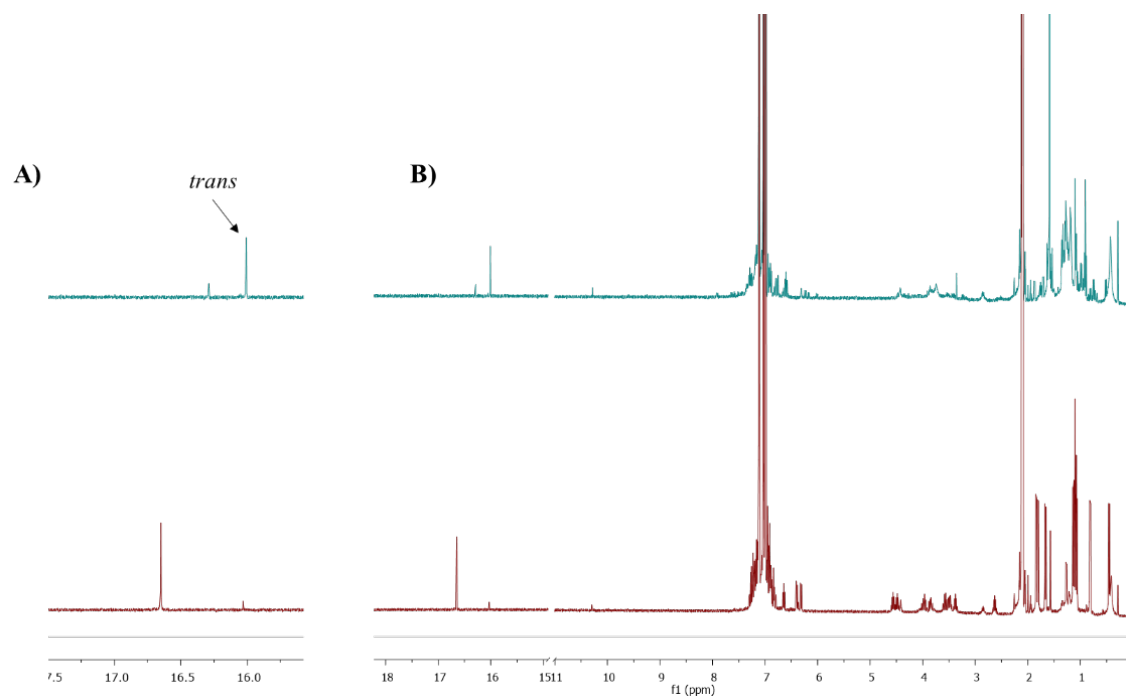

**Figure S38.**  $^1\text{H}$  NMR analysis following isomerization of **SIPr-SPh-I<sub>2</sub>** before (bottom) and after irradiation at 350 nm in toluene- $d_8$  for 2 h (top): A) Zoom-in of the carbene region (% isomerization > 99); B) the full spectra.

\*8% decomposition.

Part VIII. *cis-trans* photoisomerization studies following irradiation at 510 nm

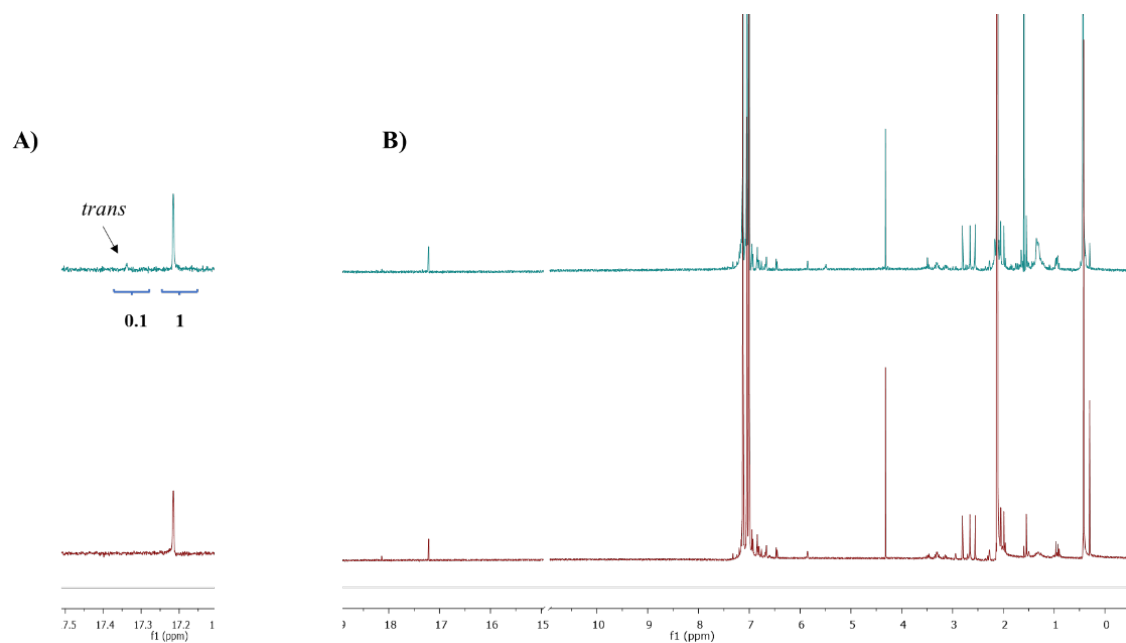

**Figure S39.** <sup>1</sup>H NMR analysis following isomerization of **SIMes-SPh-Cl<sub>2</sub>** before (bottom) and after irradiation at 510 nm in toluene-d<sub>8</sub> for 2 h (top): A) Zoom-in of the carbene region (% isomerization = 9); B) the full spectra.

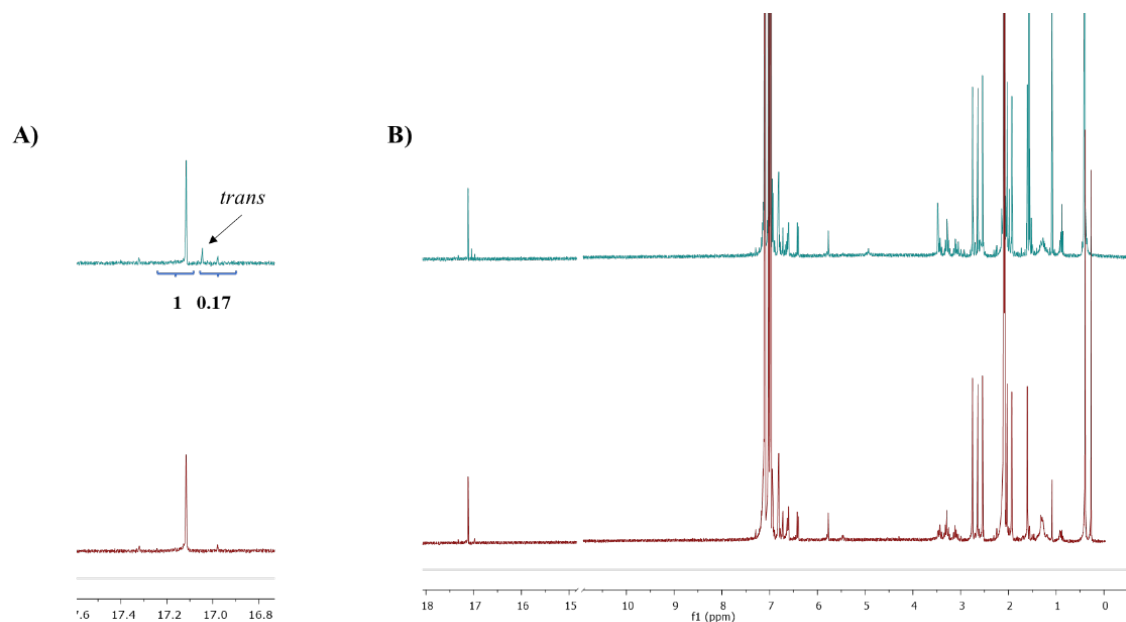

**Figure S40.** <sup>1</sup>H NMR analysis following isomerization of **SIMes-SPh-Br<sub>2</sub>** before (bottom) and after irradiation at 510 nm in toluene-d<sub>8</sub> for 2 h (top): A) Zoom-in of the carbene region (% isomerization = 15); B) the full spectra..

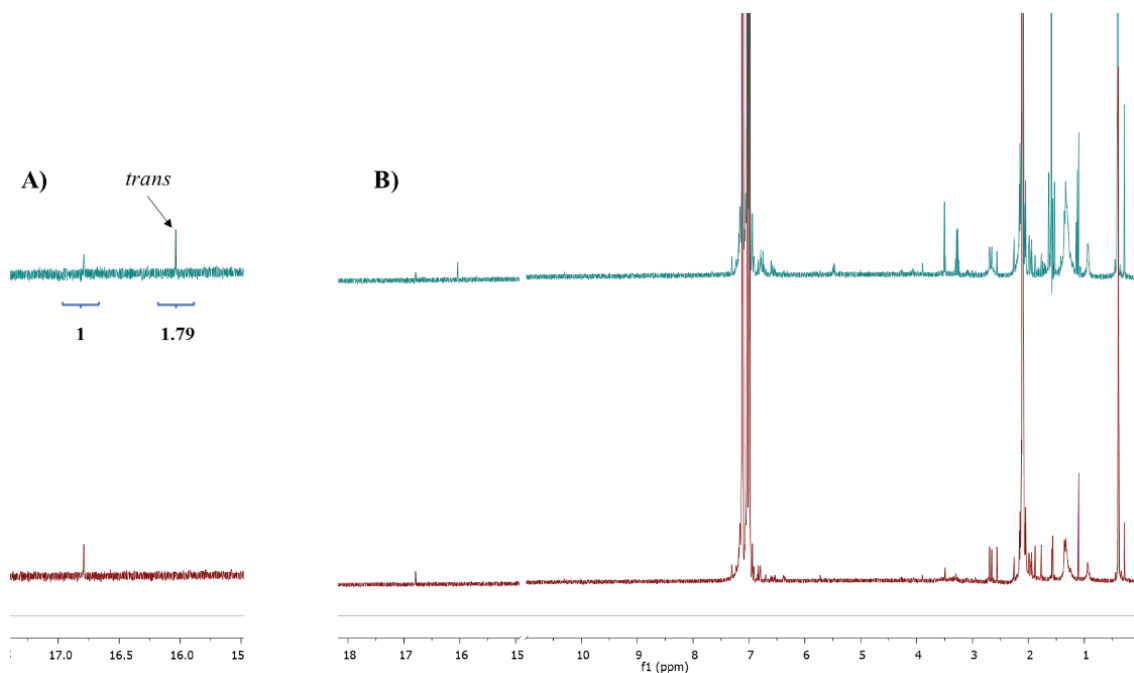

**Figure S41.**  $^1\text{H}$  NMR analysis following isomerization of **SIMes-SPh-I<sub>2</sub>** before (bottom) and after irradiation at 510 nm in toluene- $d_8$  for 2 h (top): A) Zoom-in of the carbene region (% isomerization = 64); B) the full spectra.

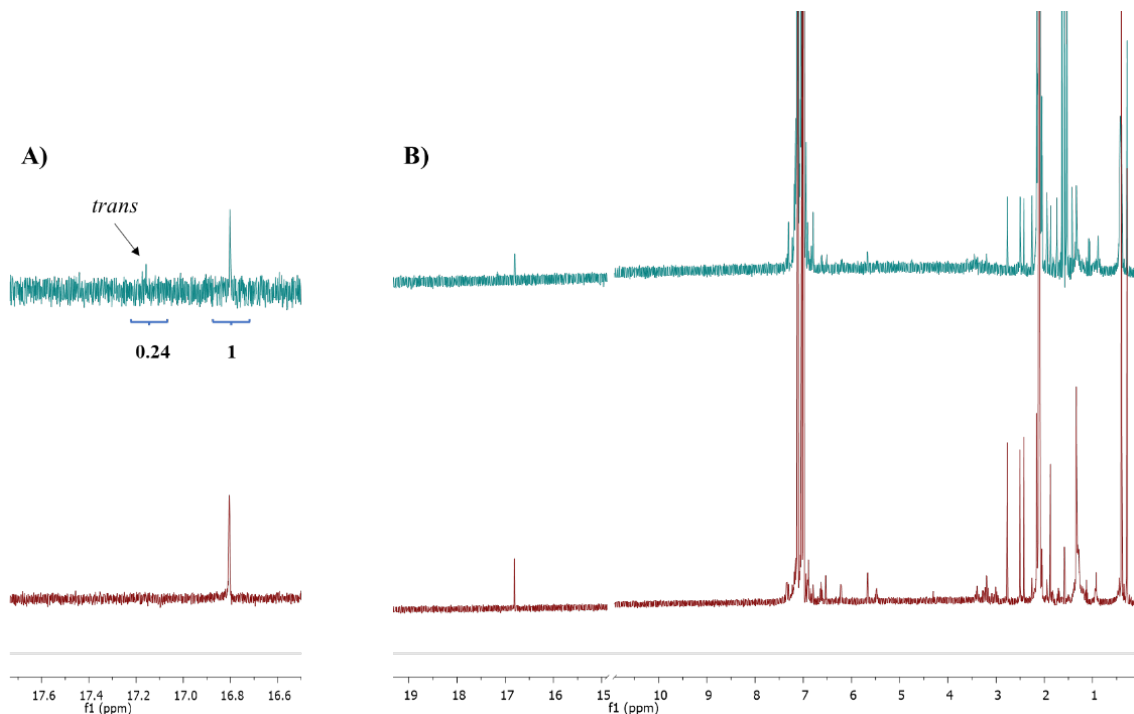

**Figure S42.**  $^1\text{H}$  NMR analysis following isomerization of **SIMes-SCF<sub>3</sub>-Cl<sub>2</sub>** before (bottom) and after irradiation at 510 nm in toluene- $d_8$  for 2 h (top): A) Zoom-in of the carbene region (% isomerization = 19); B) the full spectra.

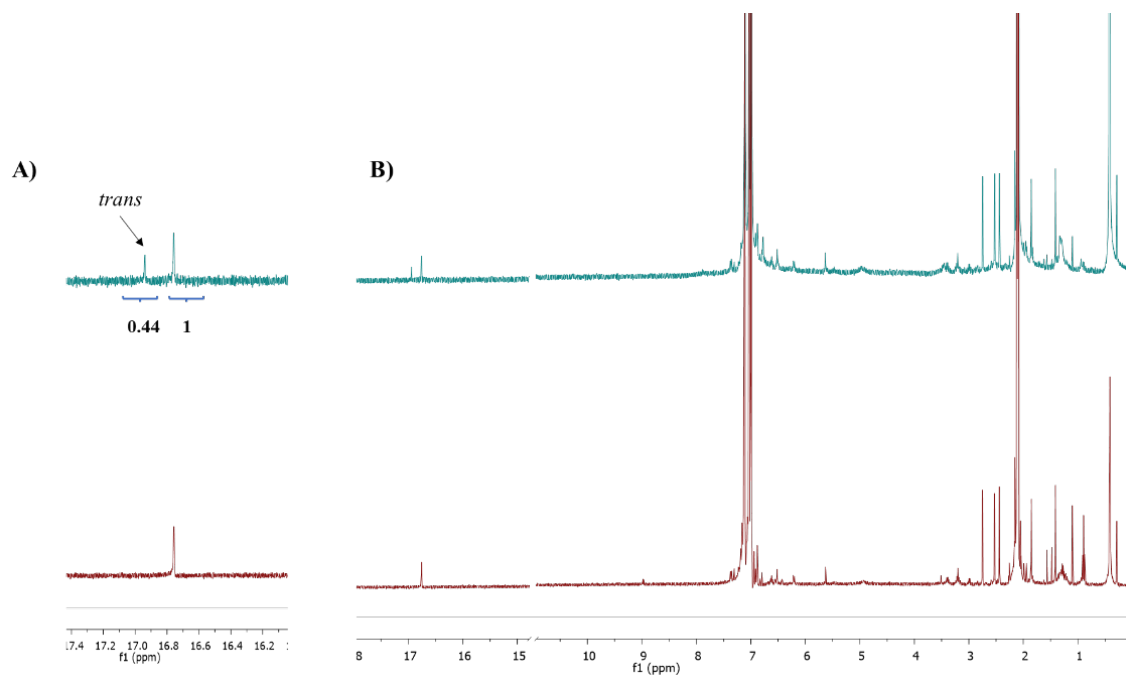

**Figure S43.**  $^1\text{H}$  NMR analysis following isomerization of **SIMes-SCF<sub>3</sub>-Br<sub>2</sub>** before (bottom) and after irradiation at 510 nm in toluene- $d_8$  for 2 h (top): A) Zoom-in of the carbene region (% isomerization = 31); B) the full spectra..

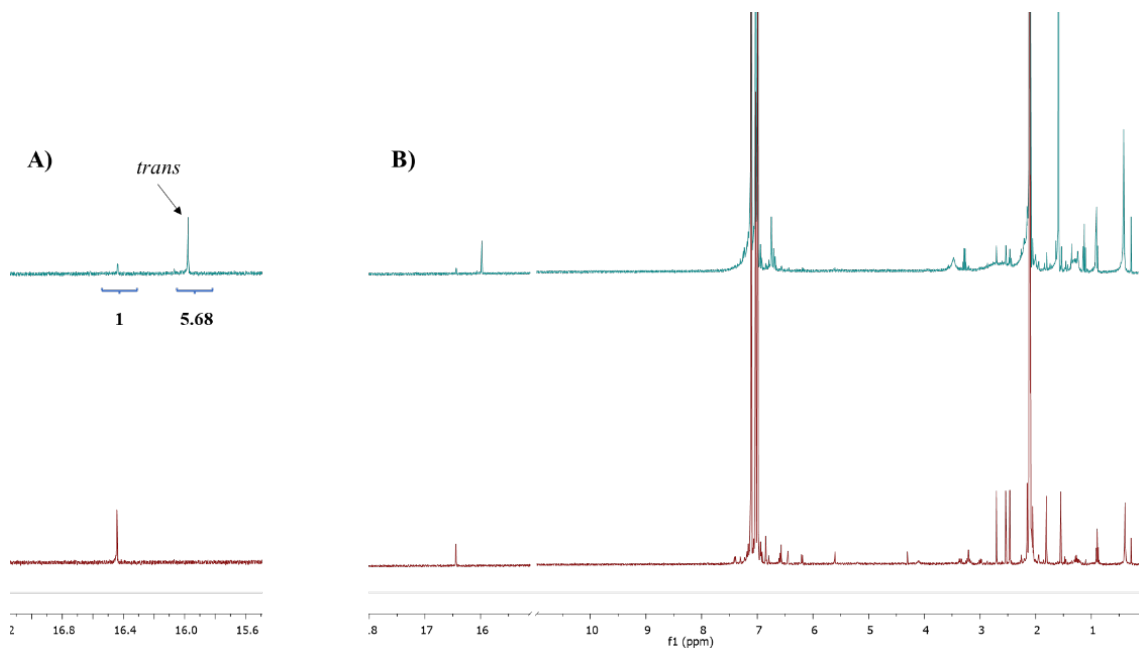

**Figure S44.**  $^1\text{H}$  NMR analysis following isomerization of **SIMes-SCF<sub>3</sub>-I<sub>2</sub>** before (bottom) and after irradiation at 510 nm in toluene- $d_8$  for 2 h (top): A) Zoom-in of the carbene region (% isomerization = 85); B) the full spectra.

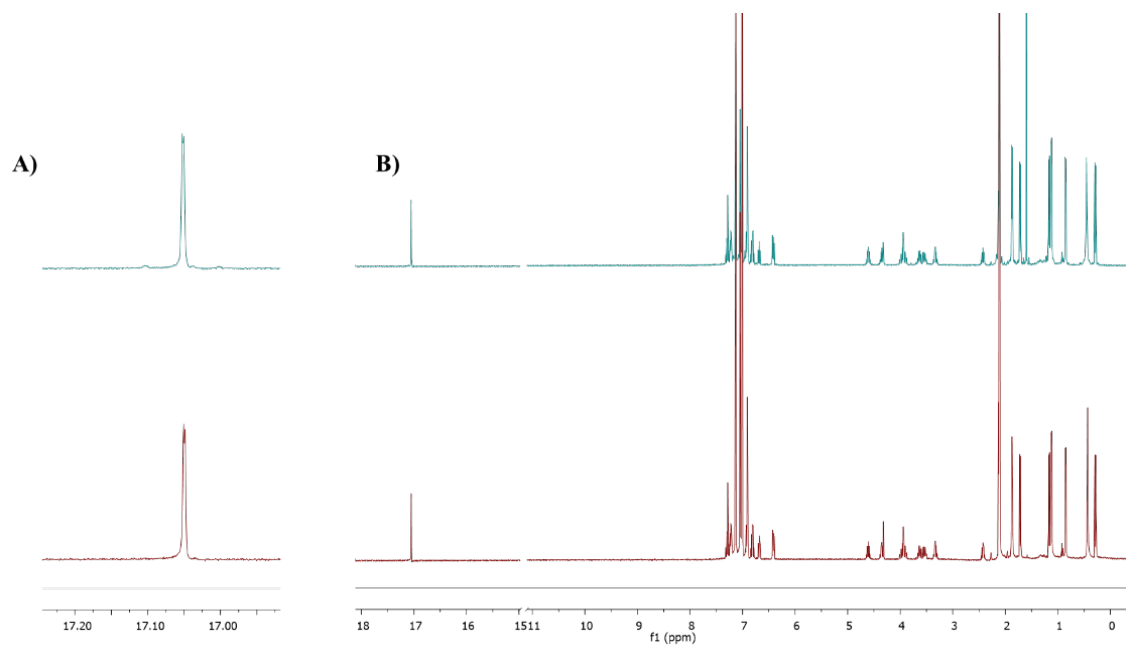

**Figure S45.**  $^1\text{H}$  NMR analysis following isomerization of **SIPr-SPh-Cl<sub>2</sub>** before (bottom) and after irradiation at 510 nm in toluene- $d_8$  for 2 h (top): A) Zoom-in of the carbene region (% isomerization = 4); B) the full spectra.

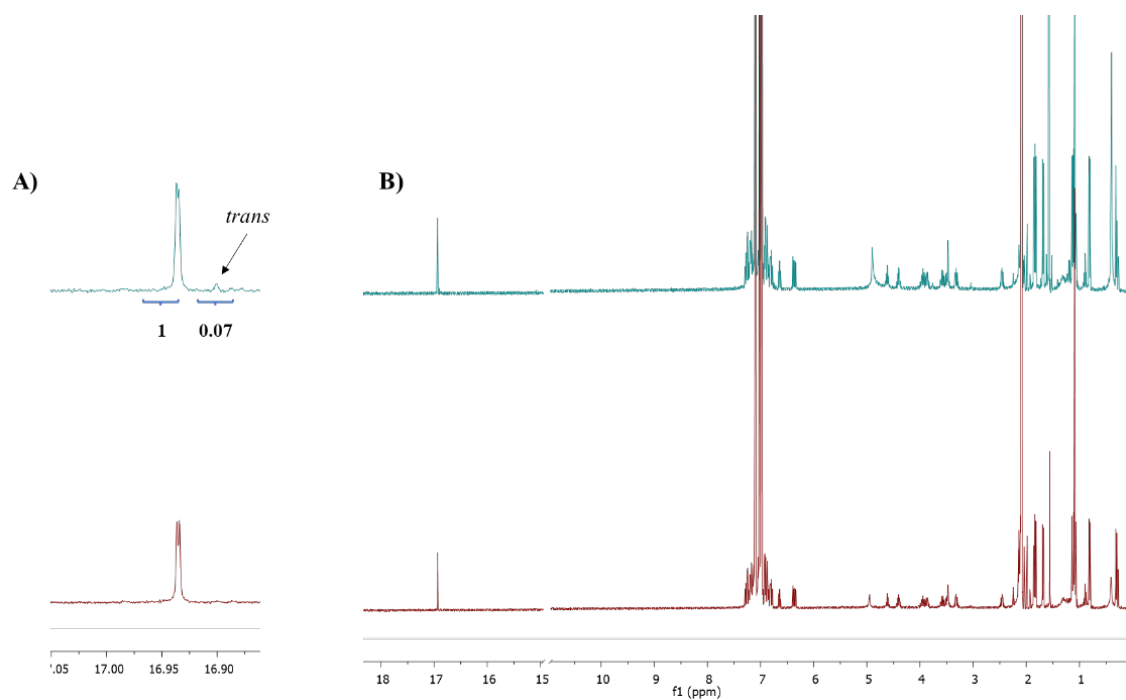

**Figure S46.**  $^1\text{H}$  NMR analysis following isomerization of **SIPr-SPh-Br<sub>2</sub>** before (bottom) and after irradiation at 510 nm in toluene- $d_8$  for 2 h (top): A) Zoom-in of the carbene region (% isomerization = 7); B) the full spectra.

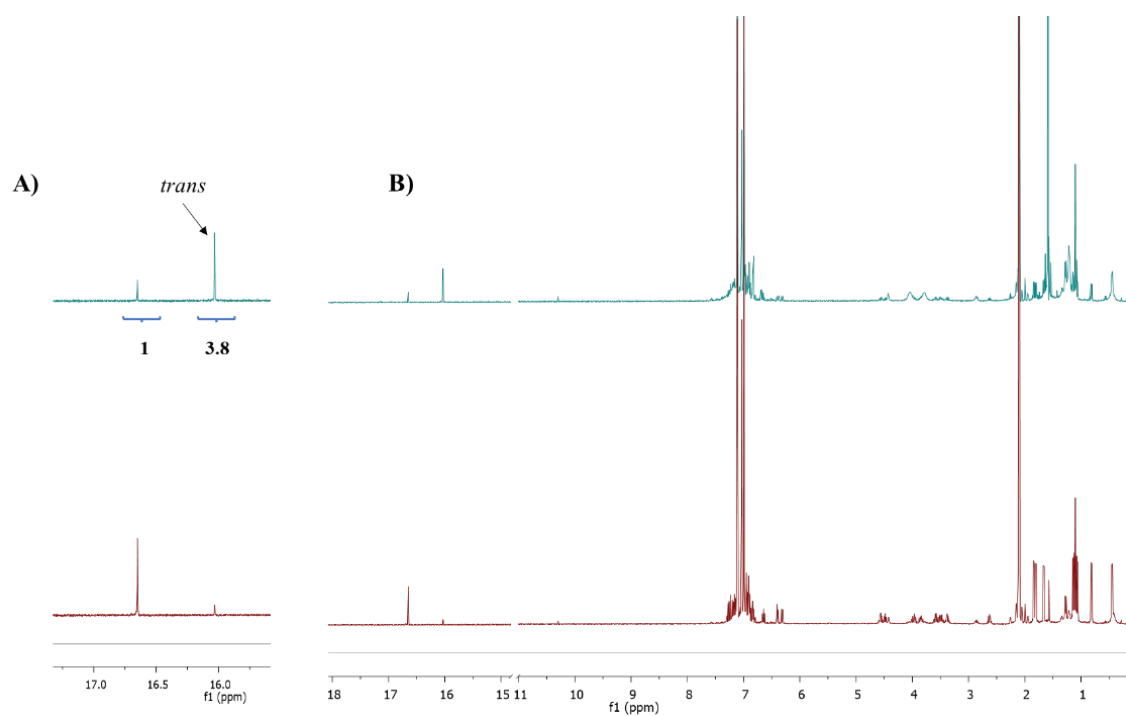

**Figure S47.**  $^1\text{H}$  NMR analysis following isomerization of **SIPr-SPh-I<sub>2</sub>** before (bottom) and after irradiation at 510 nm in toluene- $d_8$  for 2 h (top): A) Zoom-in of the carbene region (% isomerization = 79); B) the full spectra.

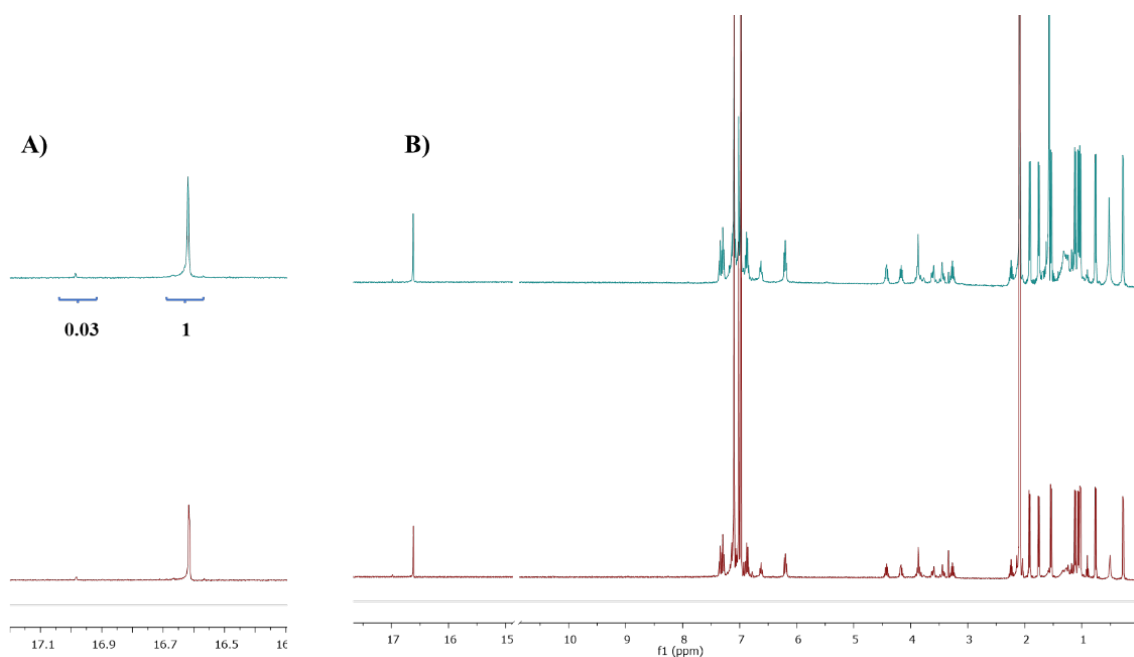

**Figure S48.**  $^1\text{H}$  NMR analysis following isomerization of **SIPr-SCF<sub>3</sub>Cl<sub>2</sub>** before (bottom) and after irradiation at 510 nm in toluene- $d_8$  for 2 h (top): A) Zoom-in of the carbene region (% isomerization = 3); B) the full spectra.

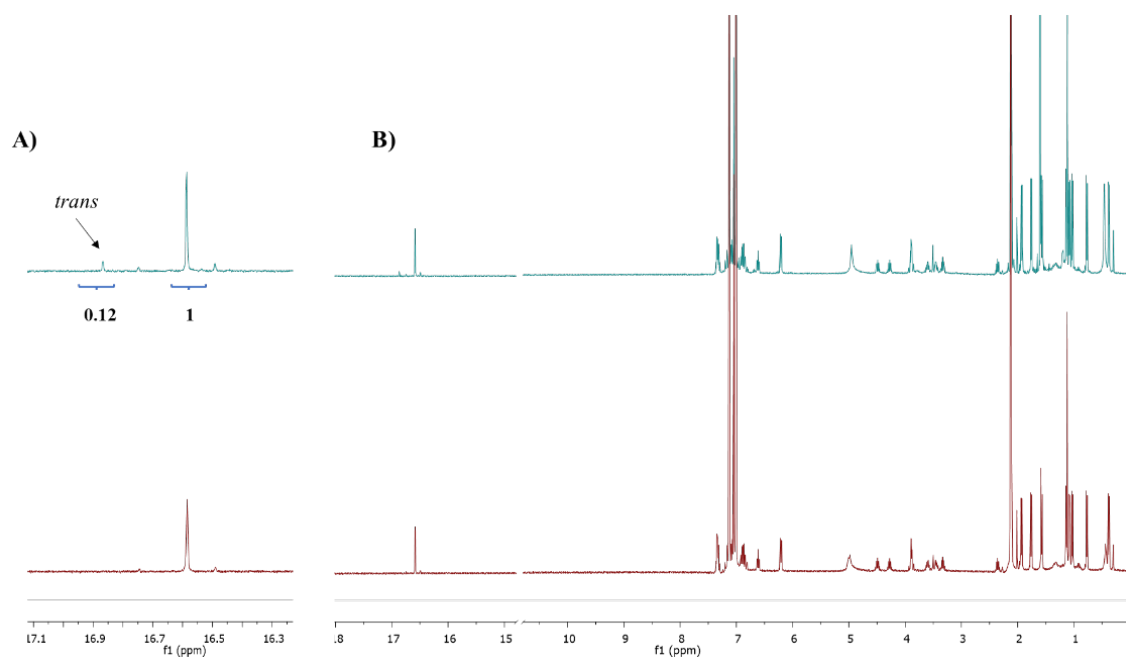

**Figure S49.**  $^1\text{H}$  NMR analysis following isomerization of  $\text{SIPr-SCF}_3\text{Br}_2$  before (bottom) and after irradiation at 510 nm in toluene- $d_8$  for 2 h (top): A) Zoom-in of the carbene region (% isomerization = 11); B) the full spectra.

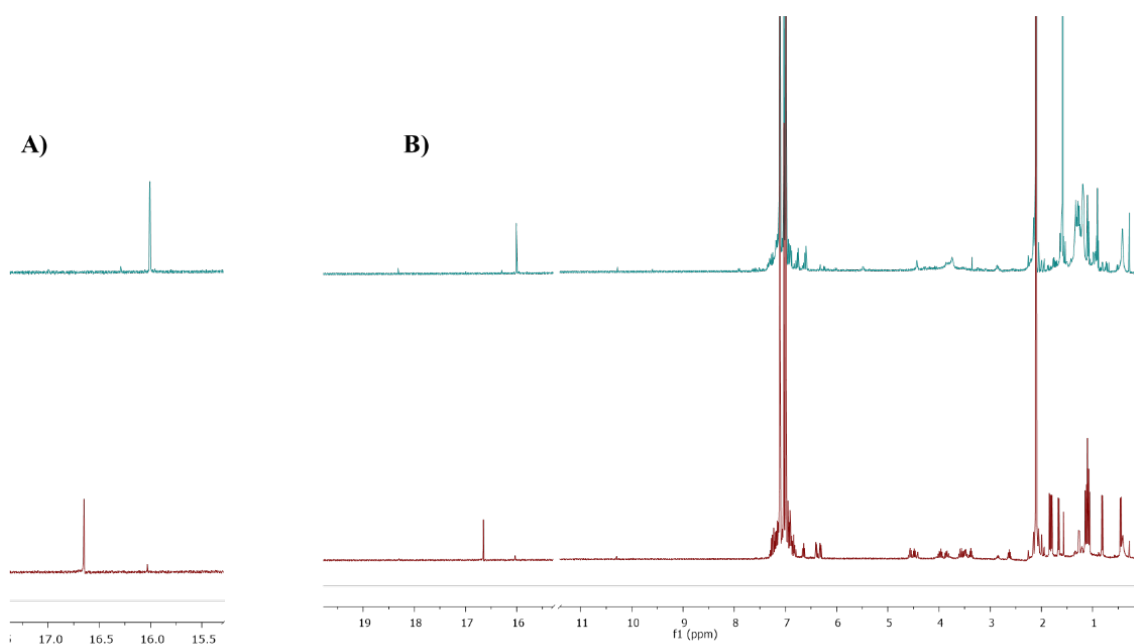

**Figure S50.**  $^1\text{H}$  NMR analysis following isomerization of  $\text{SIPr-SCF}_3\text{I}_2$  before (bottom) and after irradiation at 510 nm in toluene- $d_8$  for 2 h (top): A) Zoom-in of the carbene region (% isomerization > 99); B) the full spectra.

Part IX. Reactivity of equilibrated Ru complexes at *RT*

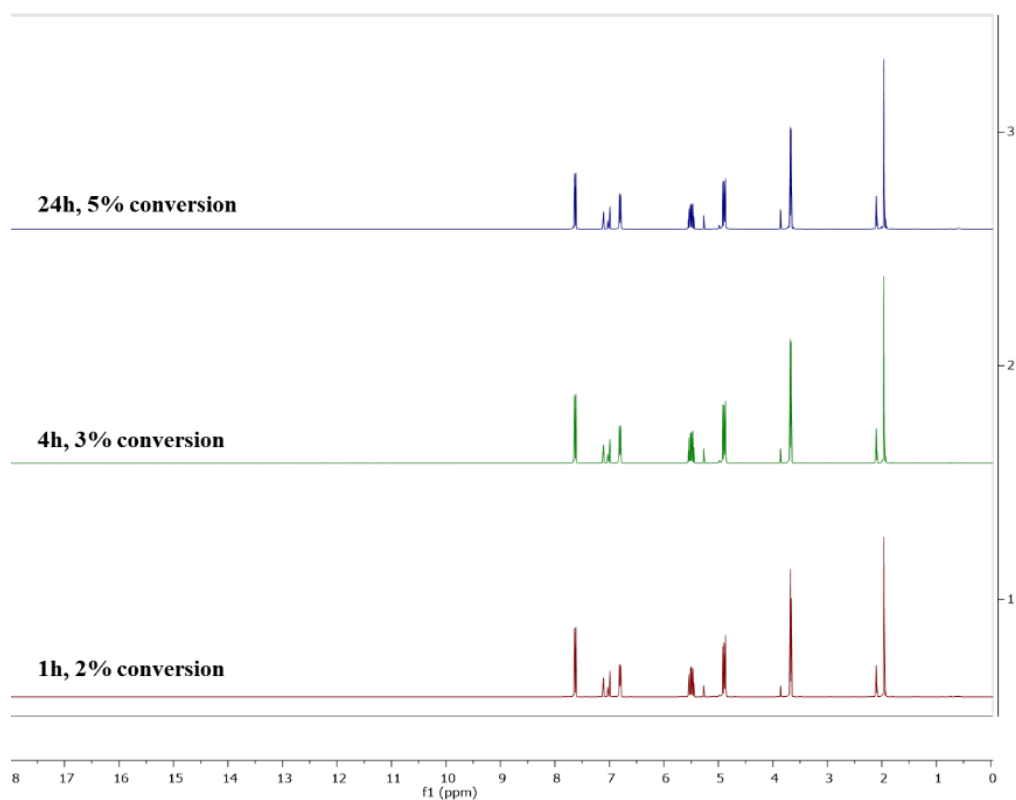

**Figure S51.** RCM of *N,N*-diallyl-4-methylbenzenesulfonamide. Reaction conditions: toluene-*d*<sub>8</sub>, 0.1M of substrate, 1 mol-% **SIMes-SCF<sub>3</sub>-Cl<sub>2</sub>**.

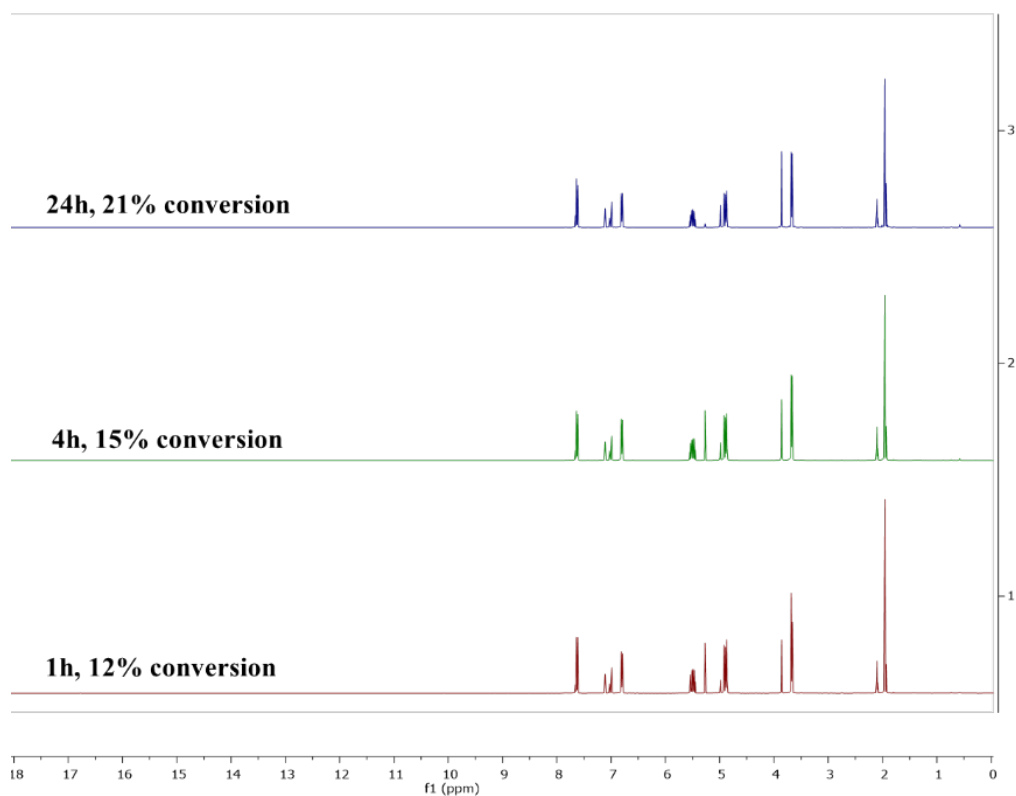

**Figure S52.** RCM of *N,N*-diallyl-4-methylbenzenesulfonamide. Reaction conditions: toluene-*d*<sub>8</sub>, 0.1M of substrate, 1 mol-% **SIMes-SCF<sub>3</sub>-Br<sub>2</sub>**.



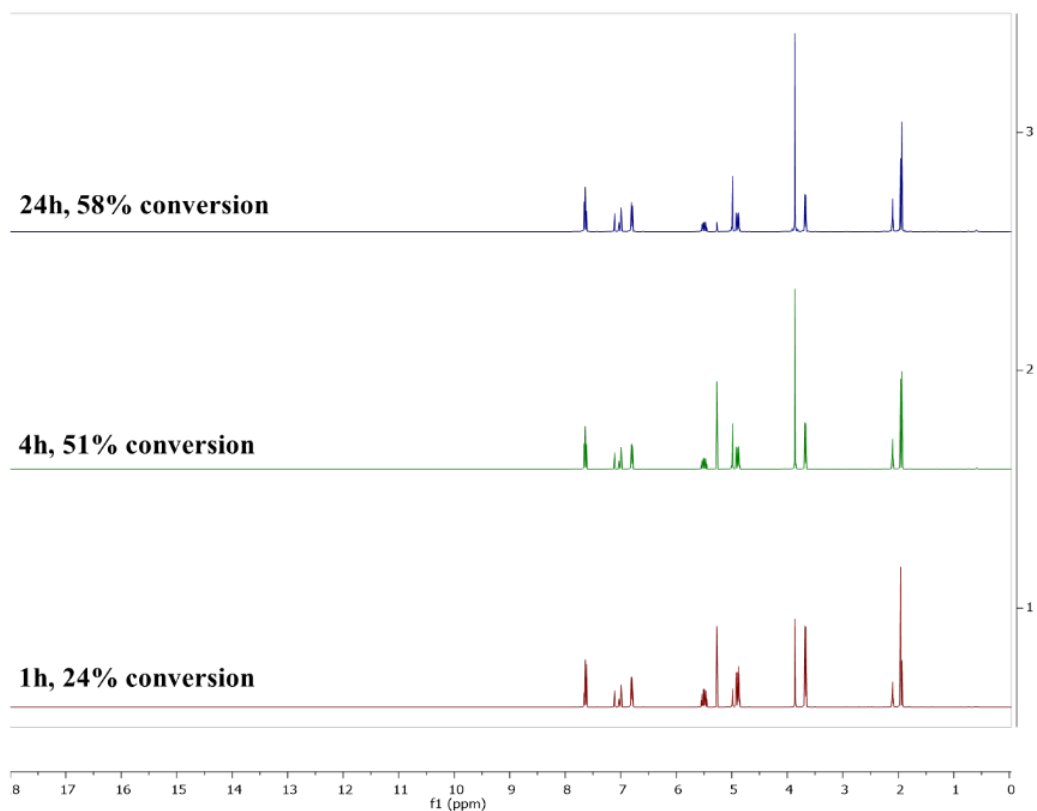

**Figure S53.** RCM of *N,N*-diallyl-4-methylbenzenesulfonamide. Reaction conditions: toluene-d<sub>8</sub>, 0.1M of substrate, 1 mol-% SIMes-SCF<sub>3</sub>-I<sub>2</sub>.

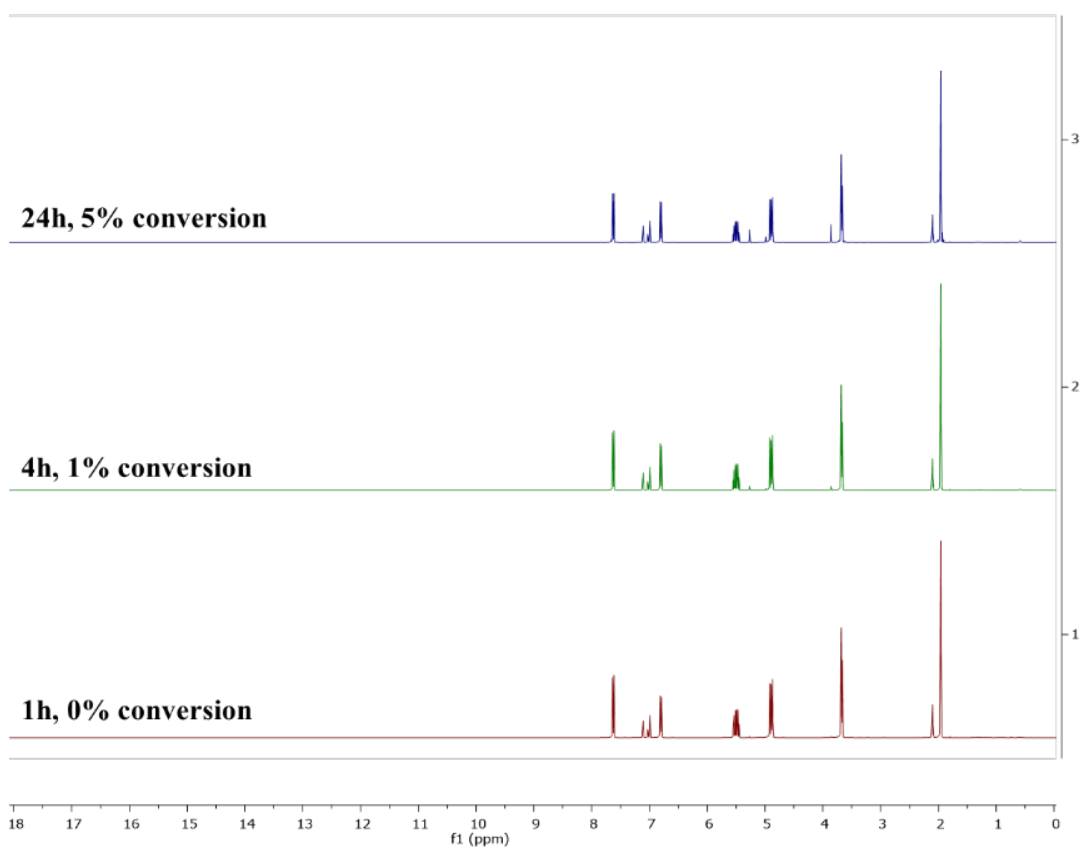

**Figure S54.** RCM of *N,N*-diallyl-4-methylbenzenesulfonamide. Reaction conditions: toluene-d<sub>8</sub>, 0.1M of substrate, 1 mol-% SIPr-SPh-Cl<sub>2</sub>.

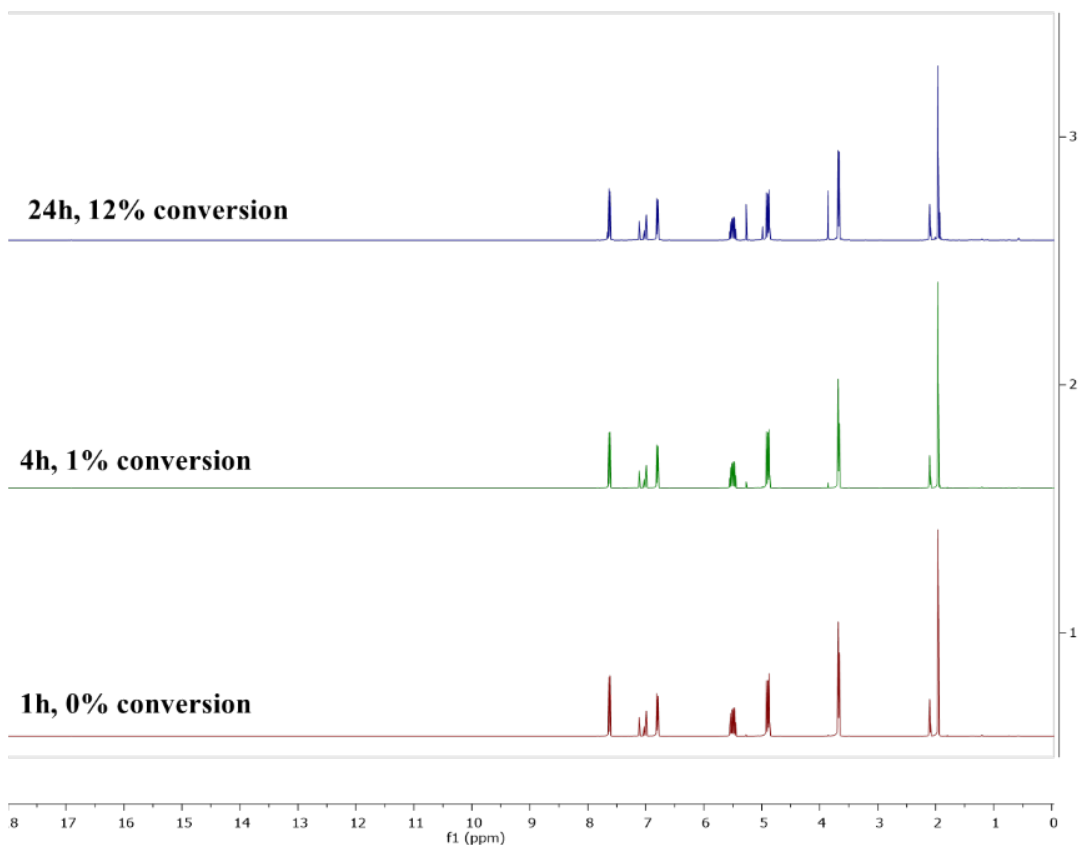

**Figure S55.** RCM of *N,N*-diallyl-4-methylbenzenesulfonamide. Reaction conditions: toluene-d<sub>8</sub>, 0.1M of substrate, 1 mol-% SIPr-SPh-Br<sub>2</sub>.

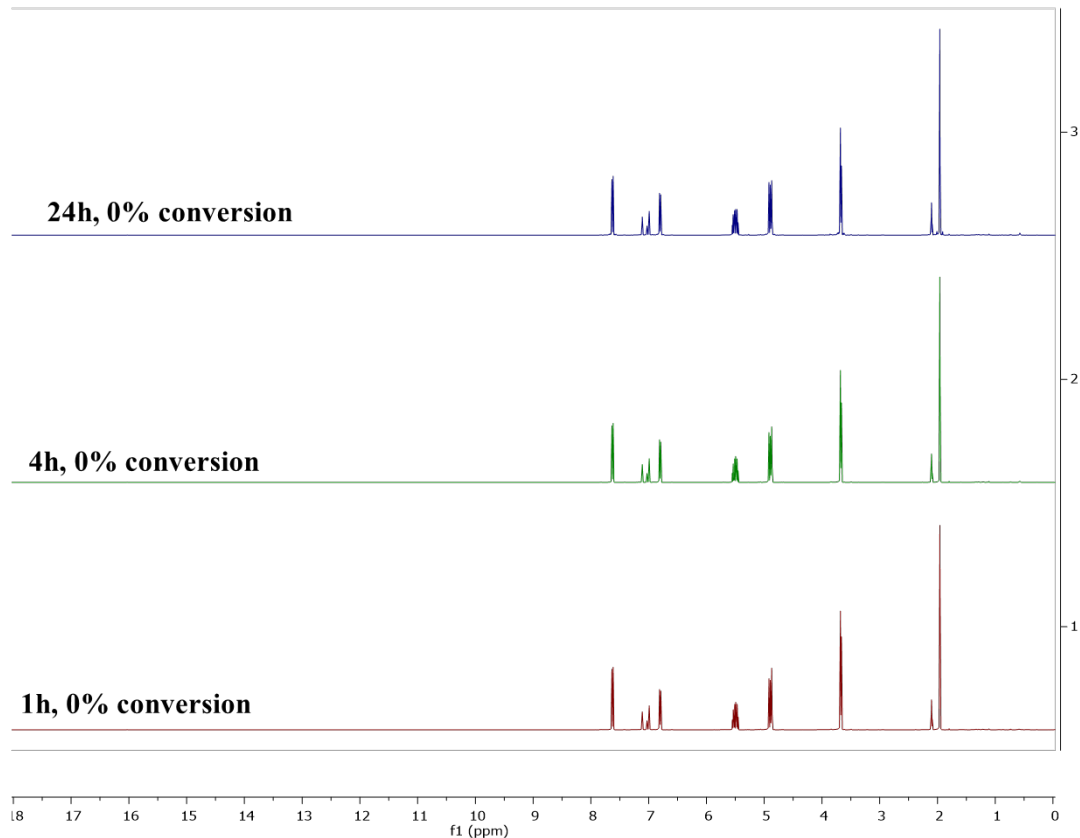

**Figure S56.** RCM of *N,N*-diallyl-4-methylbenzenesulfonamide. Reaction conditions: toluene-d<sub>8</sub>, 0.1M of substrate, 1 mol-% SIPr-SPh-I.

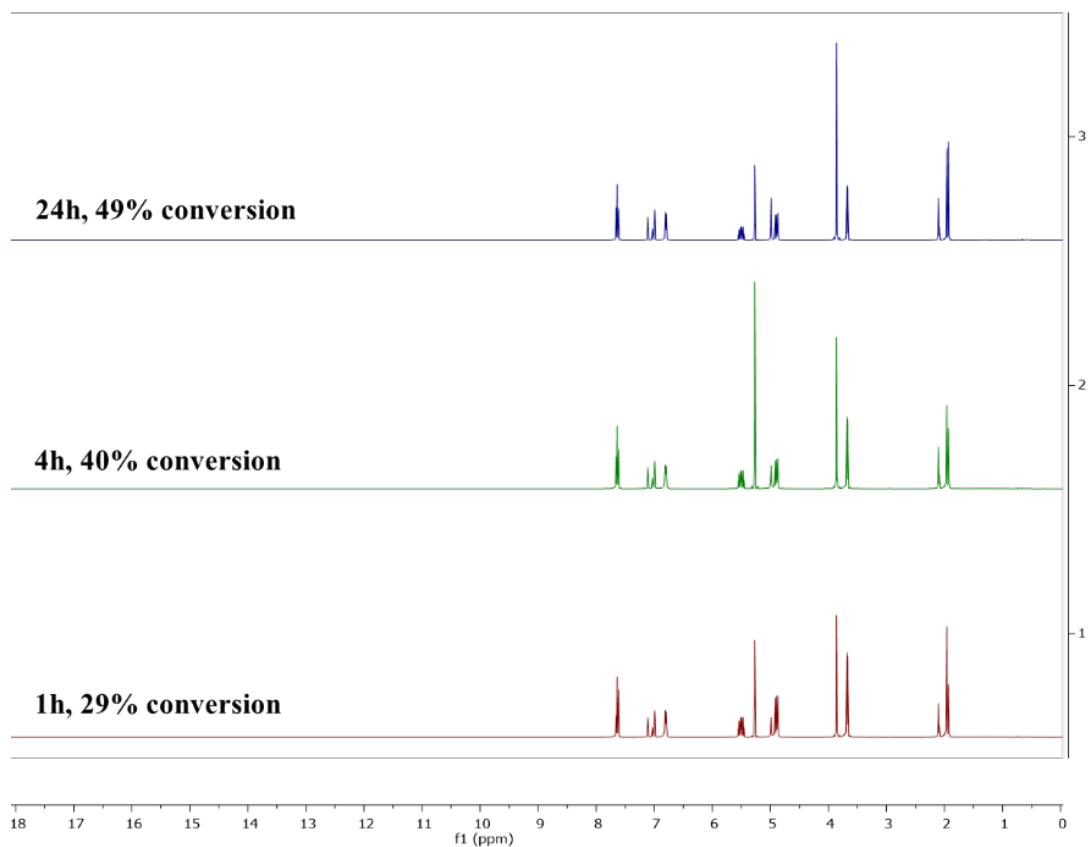

**Figure S57.** RCM of *N,N*-diallyl-4-methylbenzenesulfonamide. Reaction conditions: toluene-d<sub>8</sub>, 0.1M of substrate, 1 mol-% SIPr-SCF<sub>3</sub>-Cl<sub>2</sub>.

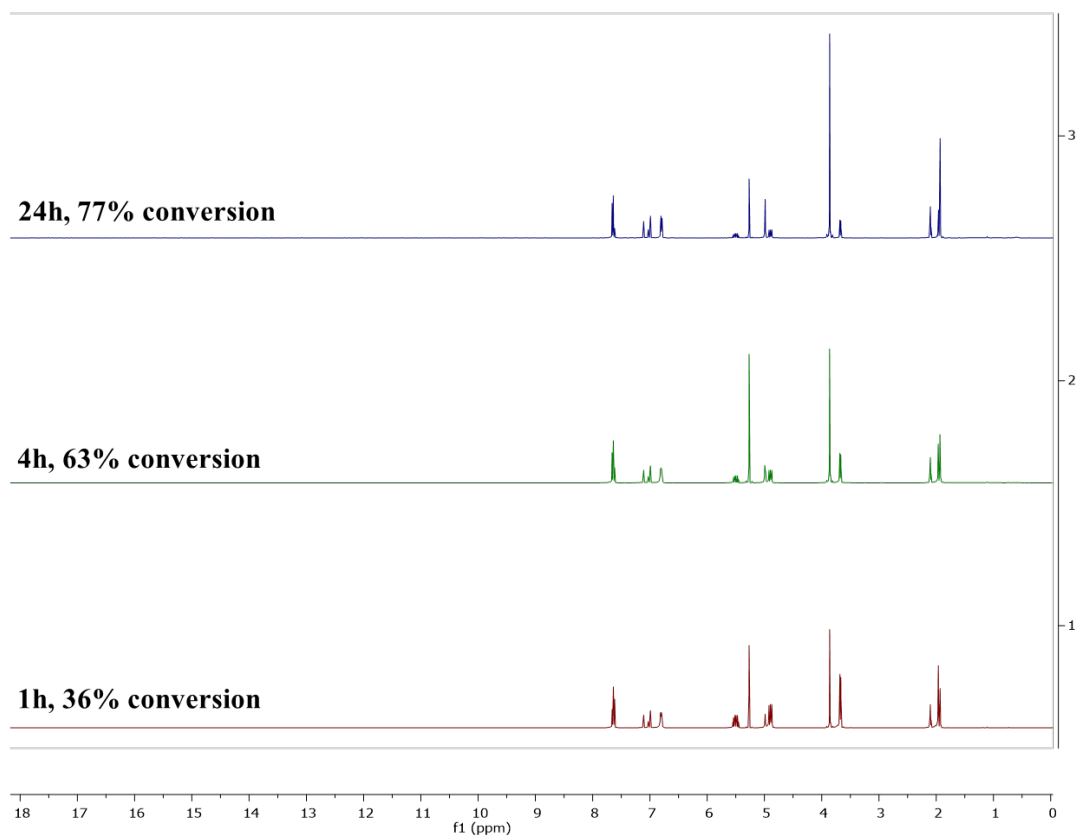

**Figure S58.** RCM of *N,N*-diallyl-4-methylbenzenesulfonamide. Reaction conditions: toluene-d<sub>8</sub>, 0.1M of substrate, 1 mol-% SIPr-SCF<sub>3</sub>-Br<sub>2</sub>.

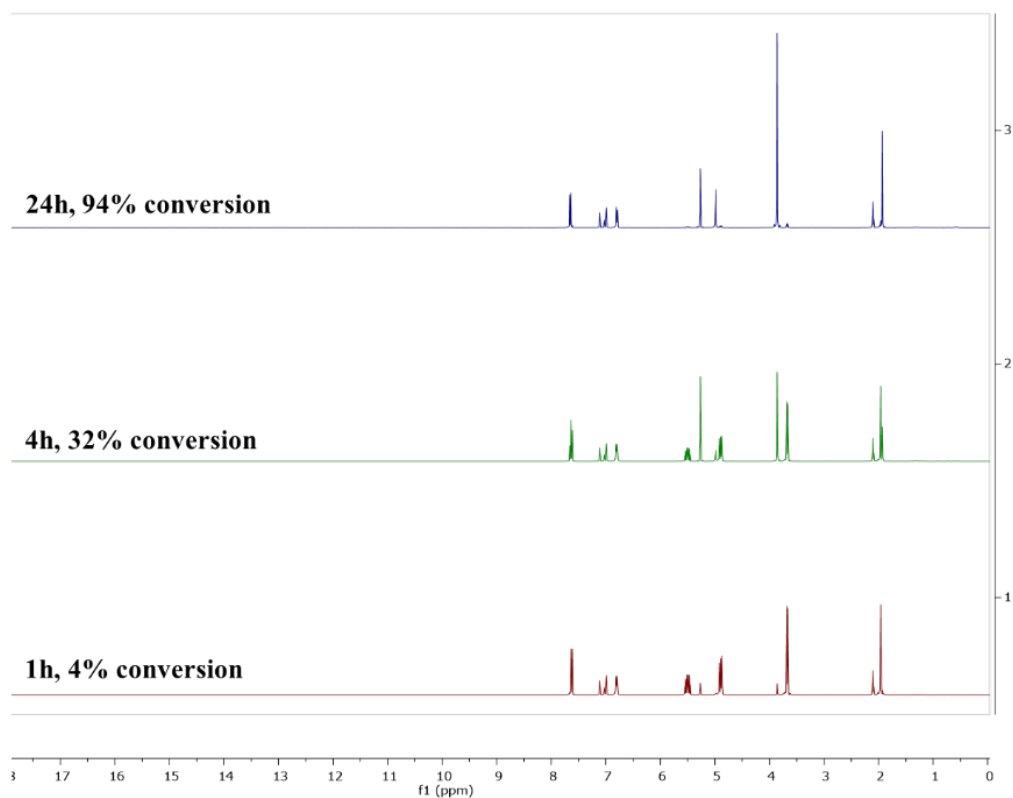

**Figure S59.** RCM of *N,N*-diallyl-4-methylbenzenesulfonamide. Reaction conditions: toluene- $d_8$ , 0.1M of substrate, 1 mol-% SIPr- $SCF_3-I_2$ .

**Part X. *cis-trans* Isomerization of SIPr-SPh- $I_2$  at room temperature**

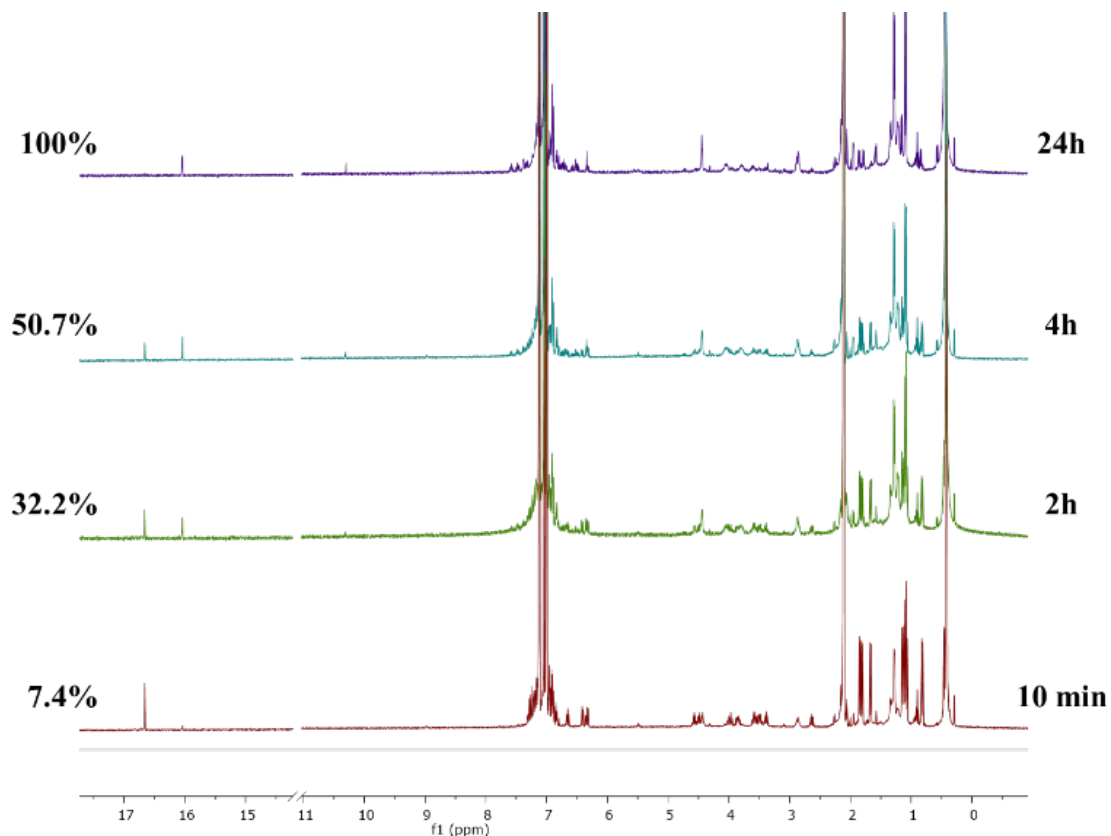

**Figure S60.** SIPr-SPh- $I_2$  in toluene- $d_8$  at *RT*.

**Part XI.** Reactivity under irradiation for SIPr-SPh complexes after isomerization

**Table S2.** Reactivity of the SIPr-SPh complexes (1 mol-%) with 0.1M of *N,N*-diallyl-4-methylbenzenesulfonamide in toluene- $d_8$ , under different conditions.

| Entry | Precatalyst              | % Conversion <sup>a</sup> | % Conversion <sup>b</sup> | % Conversion <sup>c</sup> |
|-------|--------------------------|---------------------------|---------------------------|---------------------------|
| 1     | SIPr-SPh-Cl <sub>2</sub> | 0                         | 0                         | 0                         |
| 2     | SIPr-SPh-Br <sub>2</sub> | 0                         | 0                         | 1                         |
| 3     | SIPr-SPh-I <sub>2</sub>  | 0                         | 0                         | 0                         |

<sup>a</sup> Irradiating the precatalyst at 350 nm for 1 h, and then addition of the RCM substrate at *RT* for 1h.

<sup>b</sup> Heating the precatalyst at 100 °C for 30 min, and then addition of the RCM substrate followed by irradiation at 350 nm for 1 h at *RT*.

<sup>c</sup> Irradiating the mixture of both precatalyst and RCM substrate at 350 nm for 1h.

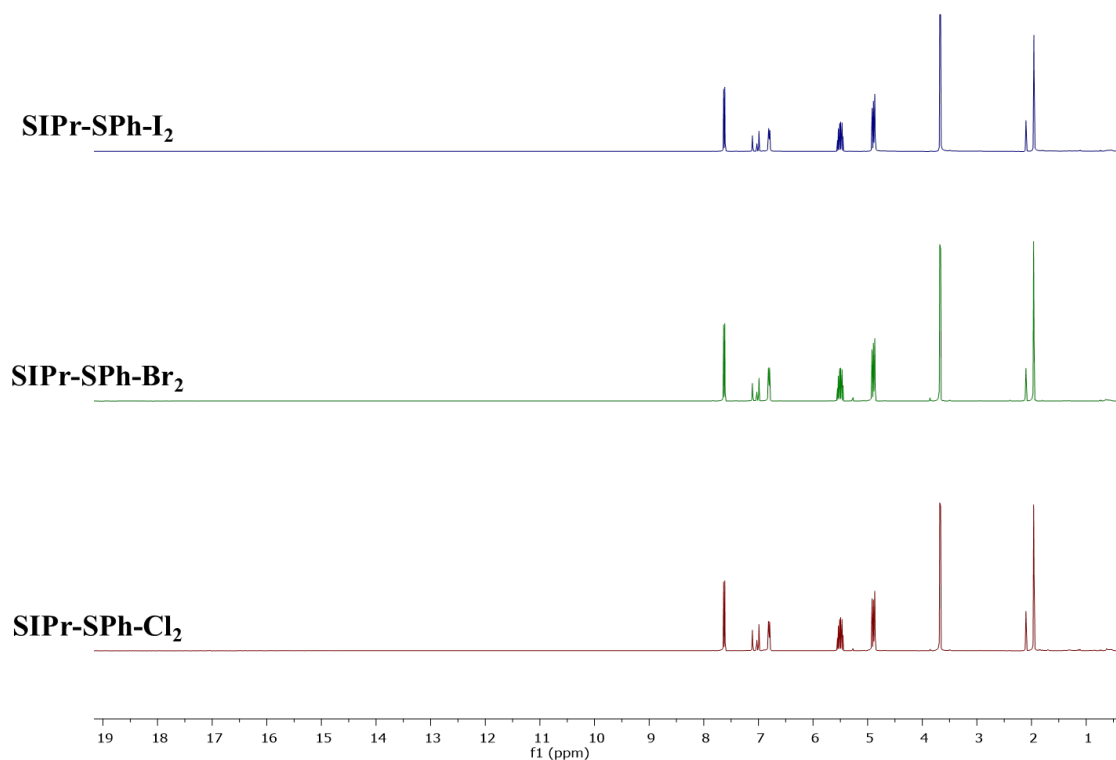

**Figure S61.** <sup>1</sup>H NMR spectra of *N,N*-diallyl-4-methylbenzenesulfonamide in toluene- $d_8$ , following irradiation of different precatalysts (1 mol-%) at 350 nm for 1 h and then addition of the RCM substrate at *RT* for 1h (Route a in Table S2).

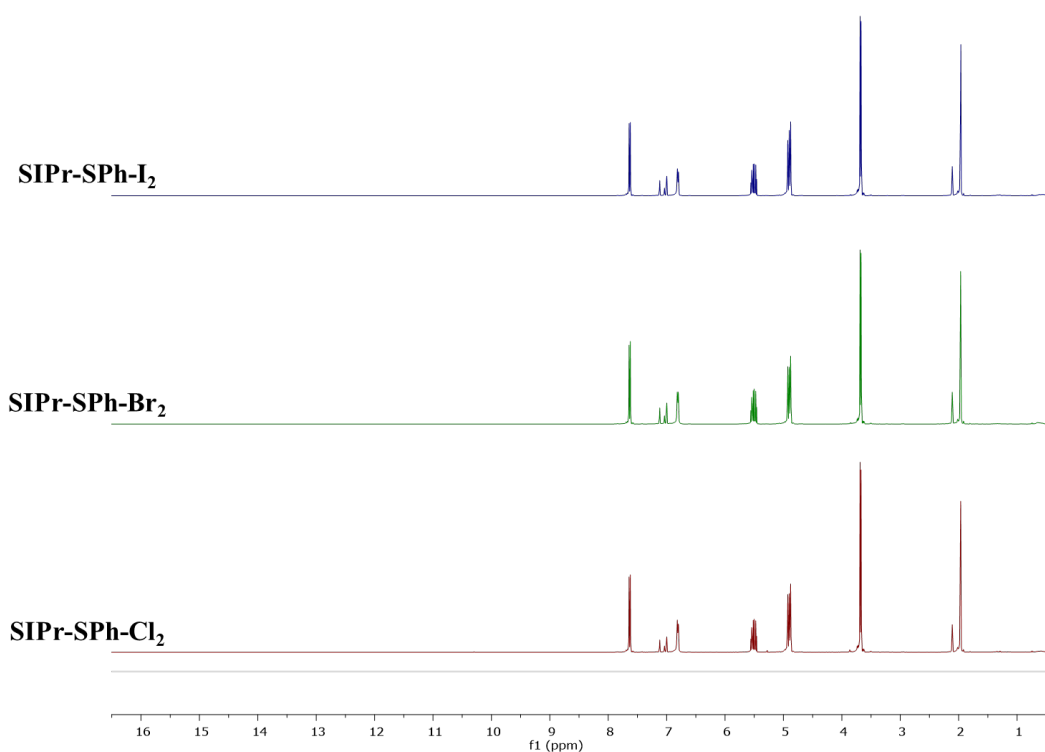

**Figure S62.**  $^1\text{H}$  NMR spectra of *N,N*-diallyl-4-methylbenzenesulfonamide in toluene- $d_8$ , following heating the different pre-catalysts (1 mol-%) to 100 °C for 30 min. and then addition of the RCM substrate followed by irradiation at 350 nm for 1h (Route b in Table S2).

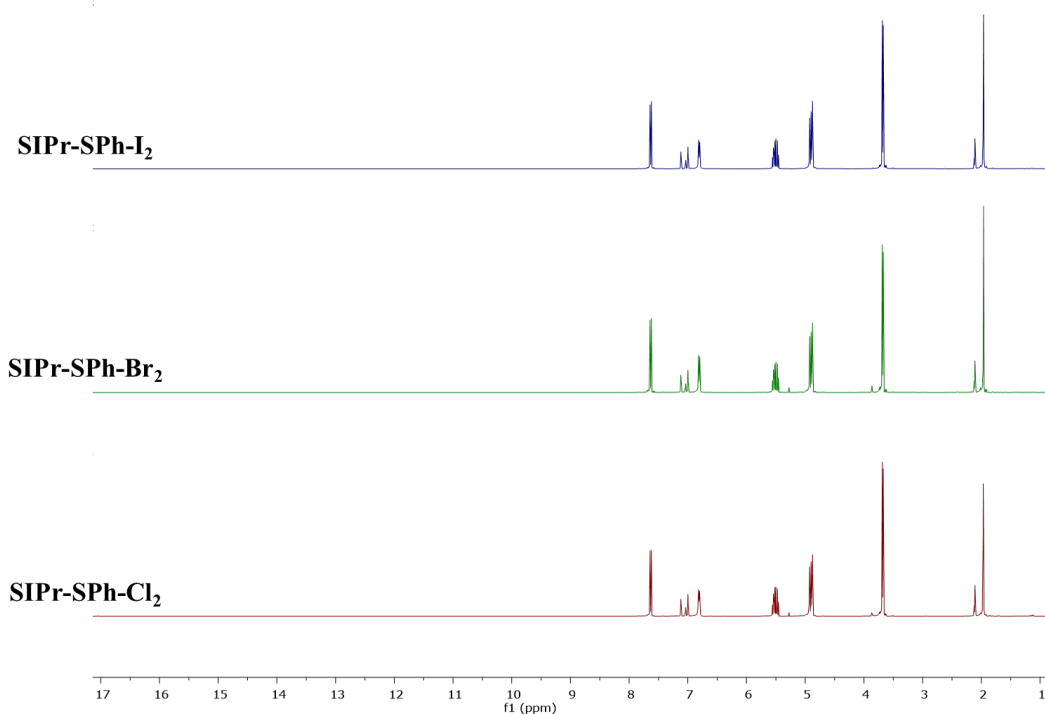

**Figure S63.**  $^1\text{H}$  NMR spectra with *N,N*-diallyl-4-methylbenzenesulfonamide in toluene- $d_8$ , following irradiation of different pre-catalysts (1 mol-%) and the RCM substrate at 350 nm for 1h (Route c in Table S2).

**Table S3.** Reactivity of the SIPr-SPh complexes (1 mol-%) with 0.1M of *N,N*-diallyl-4-methylbenzenesulfonamide in toluene- $d_8$  under irradiation at 510 nm in different conditions

| Entry | Precatalyst              | % Conversion <sup>a</sup> | % Conversion <sup>b</sup> |
|-------|--------------------------|---------------------------|---------------------------|
| 1     | SIPr-SPh-Cl <sub>2</sub> | 0                         | 0                         |
| 2     | SIPr-SPh-Br <sub>2</sub> | 0                         | 1                         |
| 3     | SIPr-SPh-I <sub>2</sub>  | 0                         | 0                         |

<sup>a</sup> Heating the precatalyst at 100 °C for 30 min. and then addition of the RCM substrate at *RT* followed by irradiation at 510 nm for 1 h.

<sup>b</sup> Irradiating both precatalyst and RCM substrate at 510 nm for 1 h.

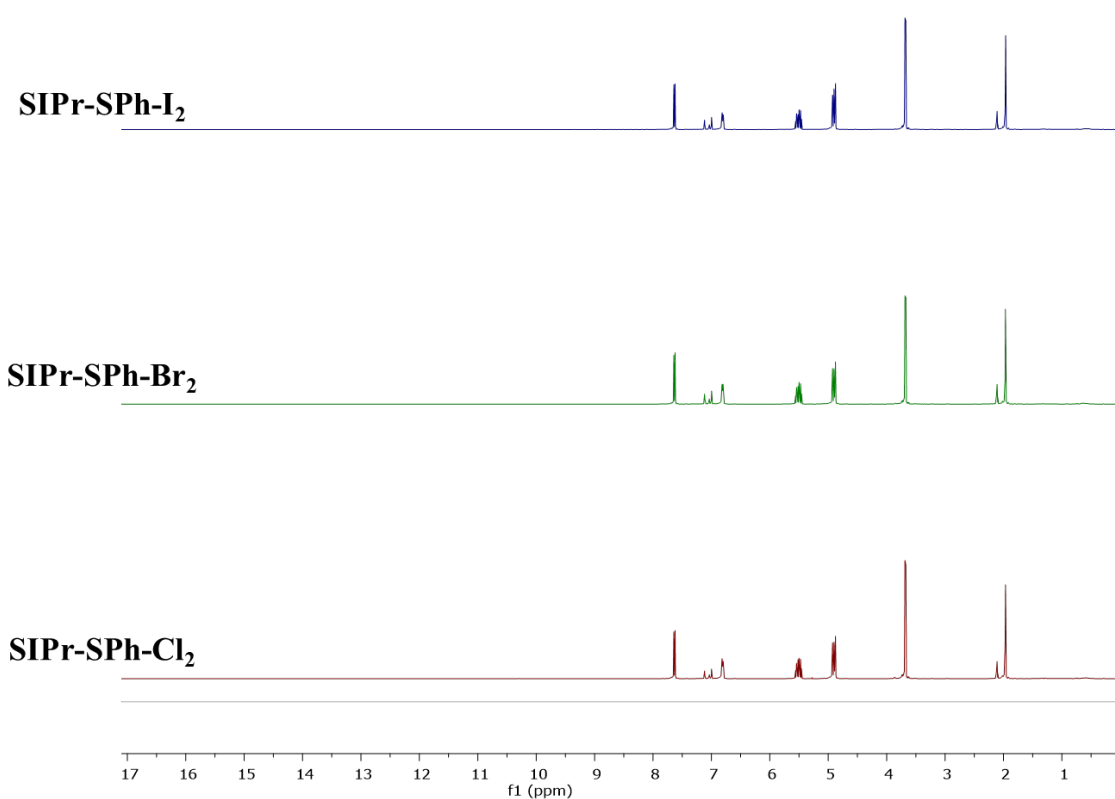

**Figure S64.** <sup>1</sup>H NMR spectra of *N,N*-diallyl-4-methylbenzenesulfonamide in toluene- $d_8$ , following heating the different precatalysts (1 mol-%) to 100 °C for 30 min. and then addition of the RCM substrate followed by irradiation at 510 nm for 1h (Route a in Table S3).

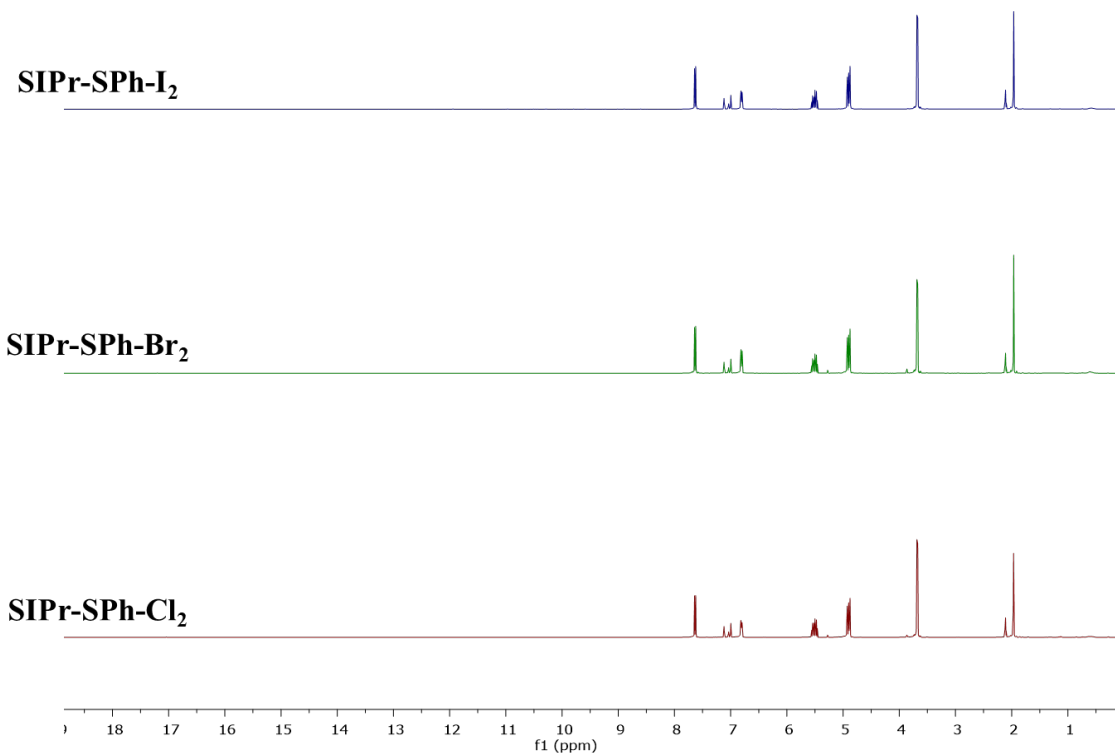

**Figure S65.** <sup>1</sup>H NMR spectra of *N,N*-diallyl-4-methylbenzenesulfonamide in toluene-*d*<sub>8</sub>, following irradiation of different pre-catalysts (1 mol-%) and the RCM substrate at 510 nm for 1 h (Route c in Table S3).



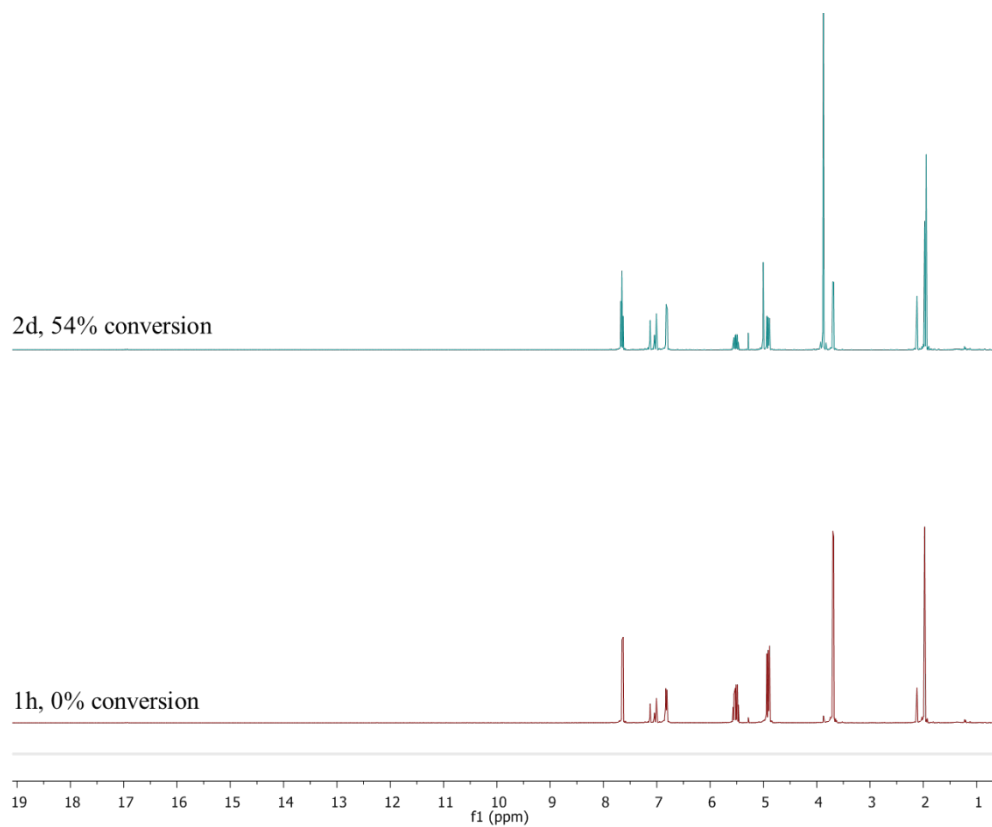

**Figure S66.** RCM of *N,N*-diallyl-4-methylbenzenesulfonamide. Reaction conditions: toluene- $d_8$ , 0.1M of substrate, 1 mol-% **SIPr-SPh-Br<sub>2</sub>** at *RT*.

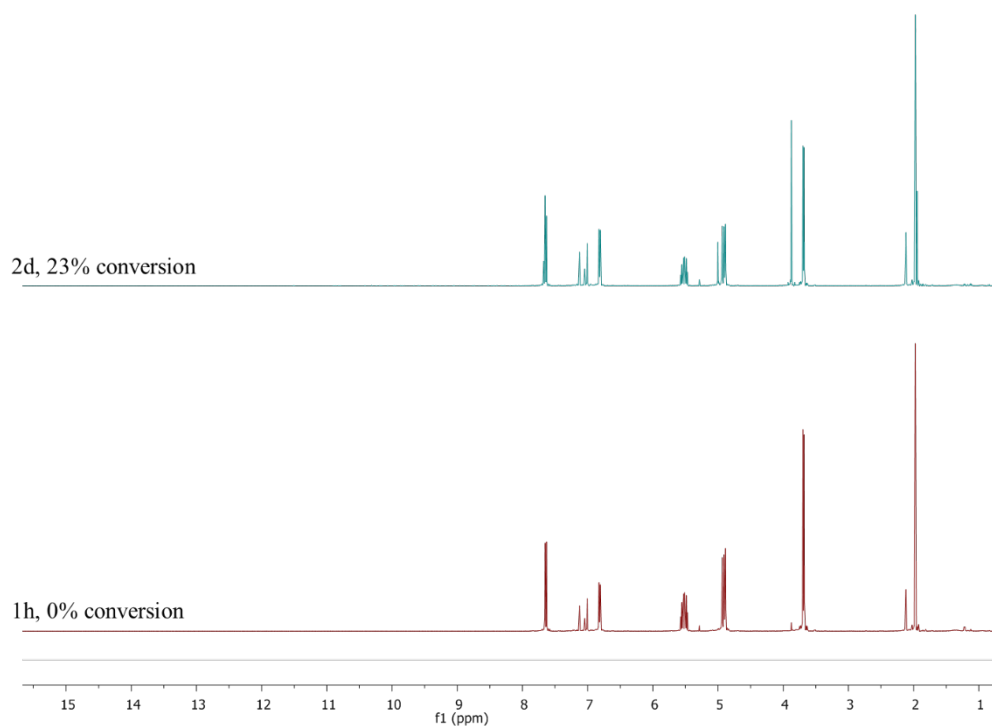

**Figure S67.** RCM of *N,N*-diallyl-4-methylbenzenesulfonamide. Reaction conditions: toluene- $d_8$ , 0.1M of substrate, 1 mol-% **SIPr-SPh-Br<sub>2</sub>** at 510 nm.

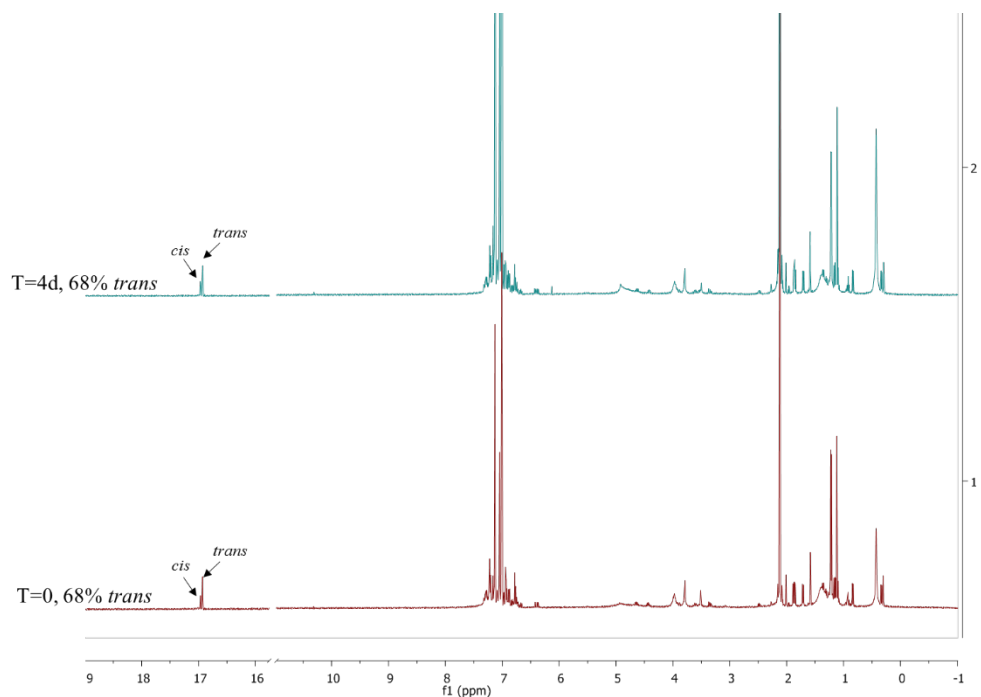

**Figure S68.** Isomerization 68% *trans*-SIPr-SPh-Br<sub>2</sub> at RT

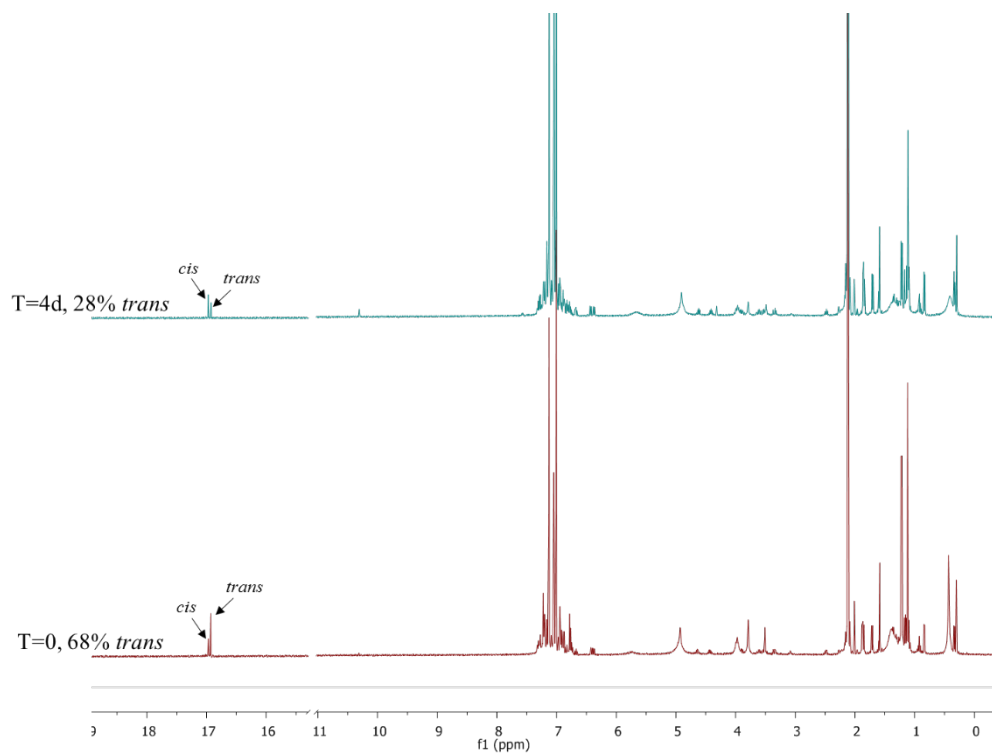

**Figure S69.** Isomerization 68% *trans*-SIPr-SPh-Br<sub>2</sub> at 510nm

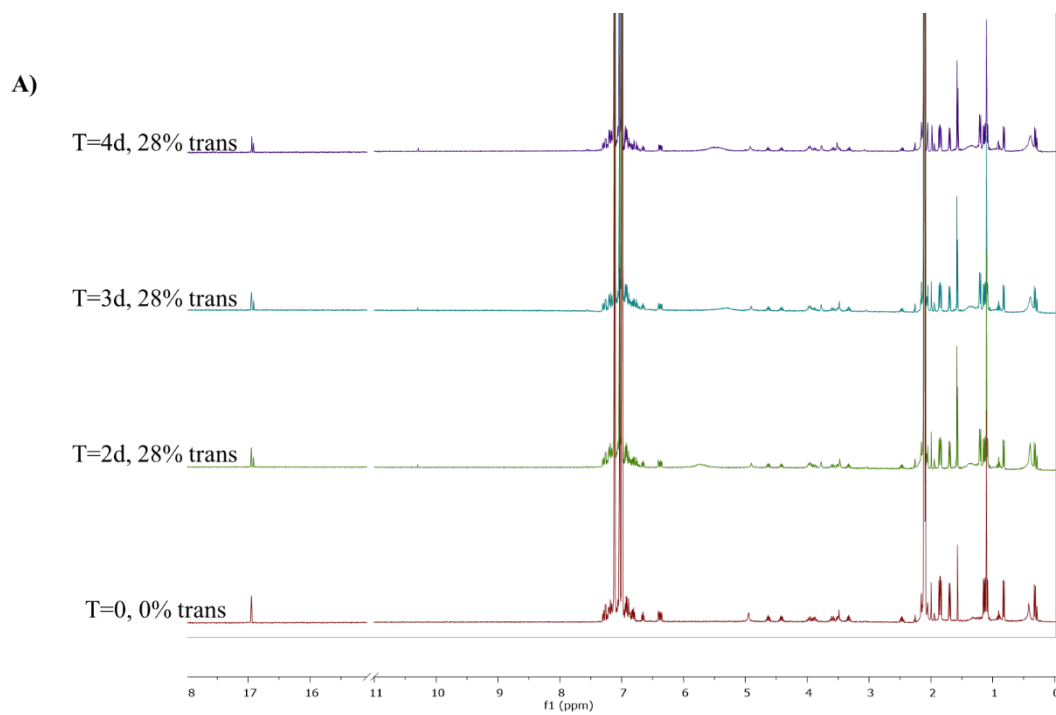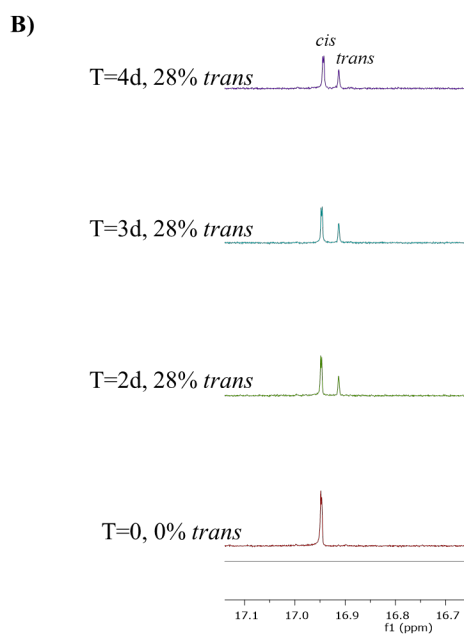

**Figure S71.** A) Isomerization of SIPr-SPh-Br<sub>2</sub> at 510nm for longer time. B) Zoom-in of the carbene region.

## Part XII. Kinetic analysis of initiation of SIPr-SPh complexes

1 mg of the complex was dissolved in 0.5 mL toluene- $d_8$  in an NMR tube, mesitylene was added as internal standard, and 10 eq of ethylvinyl ether was added. Then, the NMR tube was heated inside the NMR instrument to 80°C, and the  $^1\text{H}$ -NMR was recorded every one minute (the measuring can start only from the 5<sup>th</sup> minute, this is the time it takes to add the reagents, heat the solution inside the NMR, shim and record).

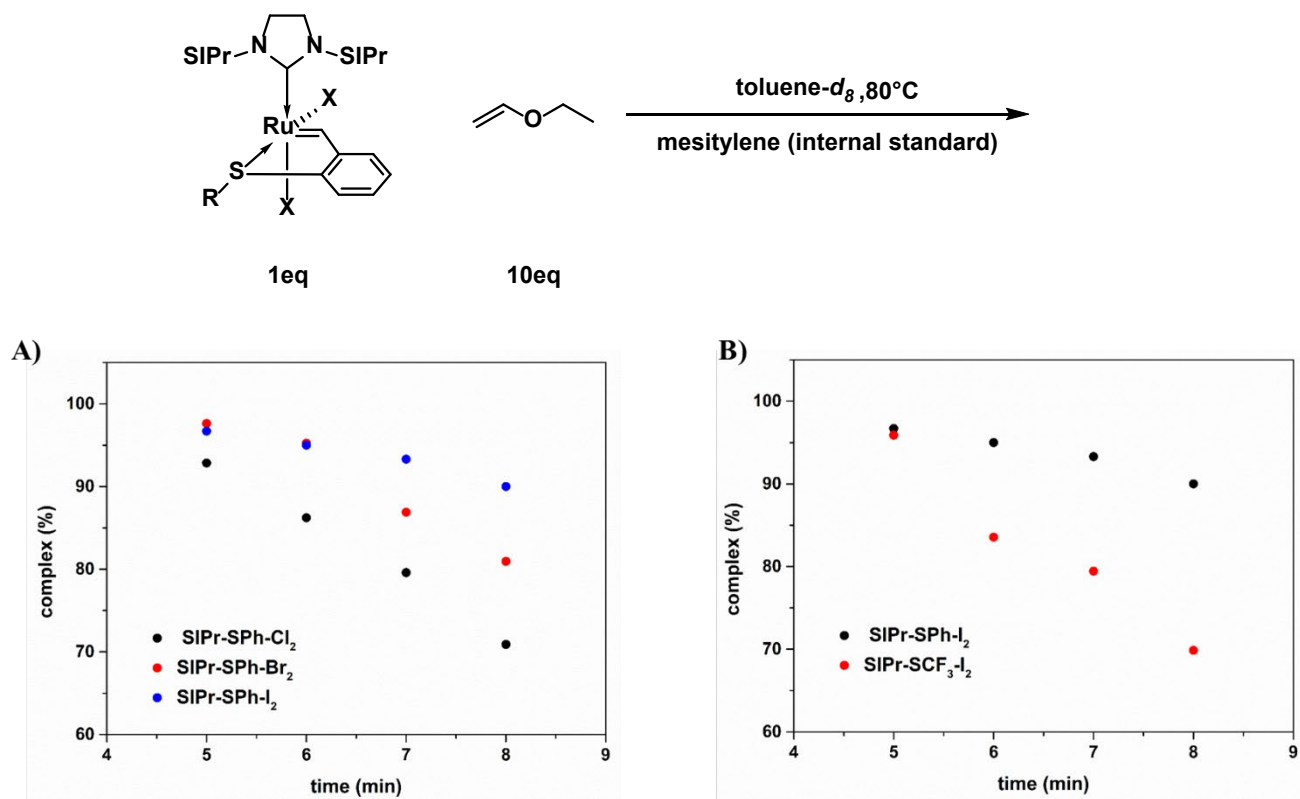

Figure S71. A) Kinetic profile of initiation of SIPr-SPh-X<sub>2</sub> complexes. B) Kinetic profile of initiation of SIPr-SPh-I<sub>2</sub> and SIPr-SCF<sub>3</sub>-I<sub>2</sub> complexes.

## References

- 1 a) Kost, T.; Sigalov, M.; Goldberg, I.; Ben-Asuly, A.; Lemcoff, N. G. *J. Organomet. Chem.* **2008**, 693, 2000 – 2203; b) Ginzburg, Y.; Anaby, A.; Vidavsky, Y.; Diesendruck, C. E.; Ben-Asuly, A.; Goldberg, I.; Lemcoff, N. G. *Organometallics*, **2011**, 30, 3430 – 3437; c) Ivry, E.; Nechmad, N.B.; Baranov, M.; Goldberg, I.; Lemcoff, N.G. *Inorg. Chem.* **2018**, 57, 15592-15599; d) Nechmad, N. B.; Kobernik, V.; Tarannam, N.; Phatake, R. S.; Eivgi, O.; Kozuch, S.; Lemcoff, N. G. *Angew. Chem., Int. Ed.* **2021**, 60, 6372–6376.
- 2 Dolomanov, O. V., Bourhis, L. J., Gildea, R. J., Howard, J. A. K. and Puschmann, H., *J. Appl. Cryst.*, **2009**, 42, 339-341.
- 3 Bourhis, L. J., Dolomanov, O. V., Gildea, R. J., Howard, J. A. K., Puschmann, H. *Acta Cryst.* **2015**, A71, 59-75.
- 4 Sheldrick, G. M. *Acta Cryst.* **2015**, C71, 3-7.
- 5 Ivry, E., Frenklah, A., Ginzburg, Y., Levin, E., Goldberg, I., Kozuch, S., Lemcoff, N.G. and Tzur, E. *Organometallics*, **2018**, 37, 176-181.
